# Supplementary material for: Cross-Link Guided Molecular Modeling with ROSETTA
Source: PLoS One. 2013 Sep 17;8(9):e73411. doi: 10.1371/journal.pone.0073411 (PMC3775805; doi:10.1371/journal.pone.0073411)
Supplement: Table S1 — List of cross-links in XLdb . (XLSX) [file pone.0073411.s006.xlsx]

## Sheet: XLdb
Table S1: List of cross-links in XLdb
# All distances were calculated with Xwalk v0.6 using following commandline command on the structure file: java -Xmx1024m Xwalk -infile xxx.pdb -dist xxx-xl.txt -bb -homo -max 80 -out xxx-xl-dist.txt
# Cross-link type	UniProt-Accession 1	UniProt-Accession 2	UniProt-Entry name 1	UniProt-Entry name 2	PDB-ID	Structure DB	Chain-ID 1	Chain-ID 2	UniProt amino-acid number 1	UniProt amino-acid number 2	PDB amino-acid number 1	PDB amino-acid number 2	Amino-acid name 1	Amno-acid name 2	Atom name 1	Atom name 2	Distance in PDB sequence	Euclidean distance	SAS distance	Cross-linkerreagent	Weblink to publication	Reference	Comments
intra	P02699	P02699	OPSD_BOVIN	OPSD_BOVIN	1f88	PDB	B	B	311	66	311	66	LYS	LYS	CB	CB	224	17.6	19.9	DST,DSG,DSS	http://onlinelibrary.wiley.com/doi/10.1110/ps.052040406/pdf	Jacobsen et al. Structure and dynamics of dark-state bovine rhodopsin revealed by chemical cross-linking and high-resolution mass spectrometry. Protein Science (2006) vol. 15 (6) pp. 1303-1317
intra	P02699	P02699	OPSD_BOVIN	OPSD_BOVIN	1f88	PDB	B	B	311	67	311	67	LYS	LYS	CB	CB	223	13.5	15	DST,DSG,DSS	http://onlinelibrary.wiley.com/doi/10.1110/ps.052040406/pdf	Jacobsen et al. Structure and dynamics of dark-state bovine rhodopsin revealed by chemical cross-linking and high-resolution mass spectrometry. Protein Science (2006) vol. 15 (6) pp. 1303-1317
intra	P02699	P02699	OPSD_BOVIN	OPSD_BOVIN	1f88	PDB	B	B	66	67	66	67	LYS	LYS	CB	CB	1	5.1	6.9	DST,DSG,DSS	http://onlinelibrary.wiley.com/doi/10.1110/ps.052040406/pdf	Jacobsen et al. Structure and dynamics of dark-state bovine rhodopsin revealed by chemical cross-linking and high-resolution mass spectrometry. Protein Science (2006) vol. 15 (6) pp. 1303-1317
intra	P02699	P02699	OPSD_BOVIN	OPSD_BOVIN	1f88	PDB	A	A	67	325	67	325	LYS	LYS	CB	CB	254	17.7	29.5	DST,DSG,DSS	http://onlinelibrary.wiley.com/doi/10.1110/ps.052040406/pdf	Jacobsen et al. Structure and dynamics of dark-state bovine rhodopsin revealed by chemical cross-linking and high-resolution mass spectrometry. Protein Science (2006) vol. 15 (6) pp. 1303-1317
intra	Q07869	Q07869	PPARA_HUMAN	PPARA_HUMAN	1kkq	PDB	A	A	349	449	349	449	LYS	LYS	CB	CB	100	15.3	18.8	BS3,BS2G	http://pubs.acs.org/doi/abs/10.1021/jm9000665	Mueller et al. An Innovative Method To Study Target Protein-Drug Interactions by Mass Spectrometry. J Med Chem (2009) vol. 52 (9) pp. 2875-2879
intra	Q07869	Q07869	PPARA_HUMAN	PPARA_HUMAN	1kkq	PDB	D	D	252	449	252	449	LYS	LYS	CB	CB	197	27.9	45.7	BS3	http://pubs.acs.org/doi/abs/10.1021/jm9000665	Mueller et al. An Innovative Method To Study Target Protein-Drug Interactions by Mass Spectrometry. J Med Chem (2009) vol. 52 (9) pp. 2875-2879
intra	P00004	P00004	CYC_HORSE	CYC_HORSE	1hrc	PDB	A	A	2	40	1	39	GLY	LYS	CA	CB	38	24.4	34.3	DSG,DSS	http://pubs.acs.org/doi/abs/10.1021/pr060154z	Seebacher et al. Protein cross-linking analysis using mass spectrometry, isotope-coded cross-linkers, and integrated computational data processing. J Proteome Res (2006) vol. 5 (9) pp. 2270-2282	# Cross-links mapped in publication on NMR structure 1akk
intra	P00004	P00004	CYC_HORSE	CYC_HORSE	1hrc	PDB	A	A	2	54	1	53	GLY	LYS	CA	CB	52	29.8	43.3	DSS	http://pubs.acs.org/doi/abs/10.1021/pr060154z	Seebacher et al. Protein cross-linking analysis using mass spectrometry, isotope-coded cross-linkers, and integrated computational data processing. J Proteome Res (2006) vol. 5 (9) pp. 2270-2282	# Cross-links mapped in publication on NMR structure 1akk
intra	P00004	P00004	CYC_HORSE	CYC_HORSE	1hrc	PDB	A	A	2	6	1	5	GLY	LYS	CA	CB	4	7.7	17.9	DSS	http://pubs.acs.org/doi/abs/10.1021/pr060154z	Seebacher et al. Protein cross-linking analysis using mass spectrometry, isotope-coded cross-linkers, and integrated computational data processing. J Proteome Res (2006) vol. 5 (9) pp. 2270-2282	# Cross-links mapped in publication on NMR structure 1akk
intra	P00004	P00004	CYC_HORSE	CYC_HORSE	1hrc	PDB	A	A	2	89	1	88	GLY	LYS	CA	CB	87	11.5	14.6	DSS	http://pubs.acs.org/doi/abs/10.1021/pr060154z	Seebacher et al. Protein cross-linking analysis using mass spectrometry, isotope-coded cross-linkers, and integrated computational data processing. J Proteome Res (2006) vol. 5 (9) pp. 2270-2282	# Cross-links mapped in publication on NMR structure 1akk
intra	P00004	P00004	CYC_HORSE	CYC_HORSE	1hrc	PDB	A	A	40	54	39	53	LYS	LYS	CB	CB	14	8.9	11.3	DSG,DSS	http://pubs.acs.org/doi/abs/10.1021/pr060154z	Seebacher et al. Protein cross-linking analysis using mass spectrometry, isotope-coded cross-linkers, and integrated computational data processing. J Proteome Res (2006) vol. 5 (9) pp. 2270-2282	# Cross-links mapped in publication on NMR structure 1akk
intra	P00004	P00004	CYC_HORSE	CYC_HORSE	1hrc	PDB	A	A	40	89	39	88	LYS	LYS	CB	CB	49	24.8	36	DSS	http://pubs.acs.org/doi/abs/10.1021/pr060154z	Seebacher et al. Protein cross-linking analysis using mass spectrometry, isotope-coded cross-linkers, and integrated computational data processing. J Proteome Res (2006) vol. 5 (9) pp. 2270-2282	# Cross-links mapped in publication on NMR structure 1akk
intra	P00004	P00004	CYC_HORSE	CYC_HORSE	1hrc	PDB	A	A	6	40	5	39	LYS	LYS	CB	CB	34	28.2	47.9	DSG,DSS	http://pubs.acs.org/doi/abs/10.1021/pr060154z	Seebacher et al. Protein cross-linking analysis using mass spectrometry, isotope-coded cross-linkers, and integrated computational data processing. J Proteome Res (2006) vol. 5 (9) pp. 2270-2282	# Cross-links mapped in publication on NMR structure 1akk
intra	P00004	P00004	CYC_HORSE	CYC_HORSE	1hrc	PDB	A	A	89	88	88	87	LYS	LYS	CB	CB	1	5.5	5.5	DSG,DSS	http://pubs.acs.org/doi/abs/10.1021/pr060154z	Seebacher et al. Protein cross-linking analysis using mass spectrometry, isotope-coded cross-linkers, and integrated computational data processing. J Proteome Res (2006) vol. 5 (9) pp. 2270-2282	# Cross-links mapped in publication on NMR structure 1akk
intra	P02185	P02185	MYG_PHYMC	MYG_PHYMC	1mbo	PDB	A	A	141	146	140	145	LYS	LYS	CB	CB	5	10.1	17.8	DSS	http://pubs.acs.org/doi/abs/10.1021/pr060154z	Seebacher et al. Protein cross-linking analysis using mass spectrometry, isotope-coded cross-linkers, and integrated computational data processing. J Proteome Res (2006) vol. 5 (9) pp. 2270-2282
intra	P02185	P02185	MYG_PHYMC	MYG_PHYMC	1mbo	PDB	A	A	148	141	147	140	LYS	LYS	CB	CB	7	10.8	13.1	DSG,DSS	http://pubs.acs.org/doi/abs/10.1021/pr060154z	Seebacher et al. Protein cross-linking analysis using mass spectrometry, isotope-coded cross-linkers, and integrated computational data processing. J Proteome Res (2006) vol. 5 (9) pp. 2270-2282
intra	P02185	P02185	MYG_PHYMC	MYG_PHYMC	1mbo	PDB	A	A	148	146	147	145	LYS	LYS	CB	CB	2	7.2	7.3	DSG,DSS	http://pubs.acs.org/doi/abs/10.1021/pr060154z	Seebacher et al. Protein cross-linking analysis using mass spectrometry, isotope-coded cross-linkers, and integrated computational data processing. J Proteome Res (2006) vol. 5 (9) pp. 2270-2282
intra	P02185	P02185	MYG_PHYMC	MYG_PHYMC	1mbo	PDB	A	A	43	63	42	62	LYS	LYS	CB	CB	20	18.1	32	DSS	http://pubs.acs.org/doi/abs/10.1021/pr060154z	Seebacher et al. Protein cross-linking analysis using mass spectrometry, isotope-coded cross-linkers, and integrated computational data processing. J Proteome Res (2006) vol. 5 (9) pp. 2270-2282
intra	P02185	P02185	MYG_PHYMC	MYG_PHYMC	1mbo	PDB	A	A	51	48	50	47	LYS	LYS	CB	CB	3	9.3	13.4	DSG,DSS	http://pubs.acs.org/doi/abs/10.1021/pr060154z	Seebacher et al. Protein cross-linking analysis using mass spectrometry, isotope-coded cross-linkers, and integrated computational data processing. J Proteome Res (2006) vol. 5 (9) pp. 2270-2282
intra	P02185	P02185	MYG_PHYMC	MYG_PHYMC	1mbo	PDB	A	A	51	57	50	56	LYS	LYS	CB	CB	6	12.3	22.6	DSS	http://pubs.acs.org/doi/abs/10.1021/pr060154z	Seebacher et al. Protein cross-linking analysis using mass spectrometry, isotope-coded cross-linkers, and integrated computational data processing. J Proteome Res (2006) vol. 5 (9) pp. 2270-2282
intra	P02185	P02185	MYG_PHYMC	MYG_PHYMC	1mbo	PDB	A	A	63	78	62	77	LYS	LYS	CB	CB	15	22.8	28.2	DSS	http://pubs.acs.org/doi/abs/10.1021/pr060154z	Seebacher et al. Protein cross-linking analysis using mass spectrometry, isotope-coded cross-linkers, and integrated computational data processing. J Proteome Res (2006) vol. 5 (9) pp. 2270-2282
intra	P02185	P02185	MYG_PHYMC	MYG_PHYMC	1mbo	PDB	A	A	64	63	63	62	LYS	LYS	CB	CB	1	5.3	5.7	DSG,DSS	http://pubs.acs.org/doi/abs/10.1021/pr060154z	Seebacher et al. Protein cross-linking analysis using mass spectrometry, isotope-coded cross-linkers, and integrated computational data processing. J Proteome Res (2006) vol. 5 (9) pp. 2270-2282
inter	Q03708	Q47112	IMM7_ECOLX	CEA7_ECOLX	1ujz	PDB	A	B	1	525	1	525	MET	LYS	CB	CB	165	22	37.7	DSS	http://pubs.acs.org/doi/abs/10.1021/pr060154z	Seebacher et al. Protein cross-linking analysis using mass spectrometry, isotope-coded cross-linkers, and integrated computational data processing. J Proteome Res (2006) vol. 5 (9) pp. 2270-2282
inter	Q03708	Q47112	IMM7_ECOLX	CEA7_ECOLX	1ujz	PDB	A	B	1	537	1	537	MET	LYS	CB	CB	177	23	28.6	DSS	http://pubs.acs.org/doi/abs/10.1021/pr060154z	Seebacher et al. Protein cross-linking analysis using mass spectrometry, isotope-coded cross-linkers, and integrated computational data processing. J Proteome Res (2006) vol. 5 (9) pp. 2270-2282
inter	Q03708	Q47112	IMM7_ECOLX	CEA7_ECOLX	1ujz	PDB	A	B	24	525	24	525	LYS	LYS	CB	CB	142	13.4	26.9	DSS	http://pubs.acs.org/doi/abs/10.1021/pr060154z	Seebacher et al. Protein cross-linking analysis using mass spectrometry, isotope-coded cross-linkers, and integrated computational data processing. J Proteome Res (2006) vol. 5 (9) pp. 2270-2282
inter	Q03708	Q47112	IMM7_ECOLX	CEA7_ECOLX	1ujz	PDB	A	B	43	537	43	537	LYS	LYS	CB	CB	135	16.8	19.8	DSG,DSS	http://pubs.acs.org/doi/abs/10.1021/pr060154z	Seebacher et al. Protein cross-linking analysis using mass spectrometry, isotope-coded cross-linkers, and integrated computational data processing. J Proteome Res (2006) vol. 5 (9) pp. 2270-2282
intra	Q03708	Q03708	IMM7_ECOLX	IMM7_ECOLX	1ujz	PDB	A	A	73	70	73	70	LYS	LYS	CB	CB	3	5.7	7.2	DSG,DSS	http://pubs.acs.org/doi/abs/10.1021/pr060154z	Seebacher et al. Protein cross-linking analysis using mass spectrometry, isotope-coded cross-linkers, and integrated computational data processing. J Proteome Res (2006) vol. 5 (9) pp. 2270-2282
intra	Q47112	Q47112	CEA7_ECOLX	CEA7_ECOLX	1ujz	PDB	B	B	452	456	452	456	LYS	LYS	CB	CB	4	14.4	19.3	DSS	http://pubs.acs.org/doi/abs/10.1021/pr060154z	Seebacher et al. Protein cross-linking analysis using mass spectrometry, isotope-coded cross-linkers, and integrated computational data processing. J Proteome Res (2006) vol. 5 (9) pp. 2270-2282
intra	Q47112	Q47112	CEA7_ECOLX	CEA7_ECOLX	1ujz	PDB	B	B	470	537	470	537	LYS	LYS	CB	CB	67	22.1	30.9	DSS	http://pubs.acs.org/doi/abs/10.1021/pr060154z	Seebacher et al. Protein cross-linking analysis using mass spectrometry, isotope-coded cross-linkers, and integrated computational data processing. J Proteome Res (2006) vol. 5 (9) pp. 2270-2282
intra	Q47112	Q47112	CEA7_ECOLX	CEA7_ECOLX	1ujz	PDB	B	B	490	522	490	522	LYS	LYS	CB	CB	32	20.1	25.8	DSS	http://pubs.acs.org/doi/abs/10.1021/pr060154z	Seebacher et al. Protein cross-linking analysis using mass spectrometry, isotope-coded cross-linkers, and integrated computational data processing. J Proteome Res (2006) vol. 5 (9) pp. 2270-2282
intra	Q47112	Q47112	CEA7_ECOLX	CEA7_ECOLX	1ujz	PDB	B	B	522	511	522	511	LYS	LYS	CB	CB	11	14	17.3	DSG,DSS	http://pubs.acs.org/doi/abs/10.1021/pr060154z	Seebacher et al. Protein cross-linking analysis using mass spectrometry, isotope-coded cross-linkers, and integrated computational data processing. J Proteome Res (2006) vol. 5 (9) pp. 2270-2282
intra	Q47112	Q47112	CEA7_ECOLX	CEA7_ECOLX	1ujz	PDB	B	B	525	537	525	537	LYS	LYS	CB	CB	12	14.1	16.7	DSS	http://pubs.acs.org/doi/abs/10.1021/pr060154z	Seebacher et al. Protein cross-linking analysis using mass spectrometry, isotope-coded cross-linkers, and integrated computational data processing. J Proteome Res (2006) vol. 5 (9) pp. 2270-2282
intra	Q47112	Q47112	CEA7_ECOLX	CEA7_ECOLX	1ujz	PDB	B	B	537	567	537	567	LYS	LYS	CB	CB	30	13.2	20.2	DSS	http://pubs.acs.org/doi/abs/10.1021/pr060154z	Seebacher et al. Protein cross-linking analysis using mass spectrometry, isotope-coded cross-linkers, and integrated computational data processing. J Proteome Res (2006) vol. 5 (9) pp. 2270-2282
intra	P02754	P02754	LACB_BOVIN	LACB_BOVIN	2akq	PDB	D	D	116	151	100	135	LYS	LYS	CB	CB	35	13.3	15.9	DSS	http://pubs.acs.org/doi/abs/10.1021/pr060154z	Seebacher et al. Protein cross-linking analysis using mass spectrometry, isotope-coded cross-linkers, and integrated computational data processing. J Proteome Res (2006) vol. 5 (9) pp. 2270-2282
intra	P02754	P02754	LACB_BOVIN	LACB_BOVIN	2akq	PDB	B	B	157	154	141	138	LYS	LYS	CB	CB	3	5.3	5.3	DSG,DSS	http://pubs.acs.org/doi/abs/10.1021/pr060154z	Seebacher et al. Protein cross-linking analysis using mass spectrometry, isotope-coded cross-linkers, and integrated computational data processing. J Proteome Res (2006) vol. 5 (9) pp. 2270-2282
intra	P02754	P02754	LACB_BOVIN	LACB_BOVIN	2akq	PDB	D	D	24	93	8	77	LYS	LYS	CB	CB	69	11.3	14.7	DSG,DSS	http://pubs.acs.org/doi/abs/10.1021/pr060154z	Seebacher et al. Protein cross-linking analysis using mass spectrometry, isotope-coded cross-linkers, and integrated computational data processing. J Proteome Res (2006) vol. 5 (9) pp. 2270-2282
intra	P02754	P02754	LACB_BOVIN	LACB_BOVIN	2akq	PDB	A	A	86	85	70	69	LYS	LYS	CB	CB	1	5.4	6.5	DSG,DSS	http://pubs.acs.org/doi/abs/10.1021/pr060154z	Seebacher et al. Protein cross-linking analysis using mass spectrometry, isotope-coded cross-linkers, and integrated computational data processing. J Proteome Res (2006) vol. 5 (9) pp. 2270-2282
intra	P00698	P00698	LYSC_CHICK	LYSC_CHICK	2lym	PDB	A	A	31	115	13	97	LYS	LYS	CB	CB	84	19	28.6	DSG,DSS	http://pubs.acs.org/doi/abs/10.1021/pr060154z	Seebacher et al. Protein cross-linking analysis using mass spectrometry, isotope-coded cross-linkers, and integrated computational data processing. J Proteome Res (2006) vol. 5 (9) pp. 2270-2282
intra	P61823	P61823	RNAS1_BOVIN	RNAS1_BOVIN	3rsp	PDB	A	A	33	63	7	37	LYS	LYS	CB	CB	30	13.5	15.4	DSG,DSS	http://pubs.acs.org/doi/abs/10.1021/pr060154z	Seebacher et al. Protein cross-linking analysis using mass spectrometry, isotope-coded cross-linkers, and integrated computational data processing. J Proteome Res (2006) vol. 5 (9) pp. 2270-2282
intra	P61823	P61823	RNAS1_BOVIN	RNAS1_BOVIN	3rsp	PDB	A	A	33	87	7	61	LYS	LYS	CB	CB	54	24.1	41.3	DSS	http://pubs.acs.org/doi/abs/10.1021/pr060154z	Seebacher et al. Protein cross-linking analysis using mass spectrometry, isotope-coded cross-linkers, and integrated computational data processing. J Proteome Res (2006) vol. 5 (9) pp. 2270-2282
intra	P00004	P00004	CYC_HORSE	CYC_HORSE	1hrc	PDB	A	A	26	28	25	27	LYS	LYS	CB	CB	2	6.1	6.7	DSG,DSS,BS3	http://pubs.acs.org/doi/abs/10.1021/pr060154z; http://pubs.acs.org/doi/abs/10.1021/pr070234i	Seebacher et al. Protein cross-linking analysis using mass spectrometry, isotope-coded cross-linkers, and integrated computational data processing. J Proteome Res (2006) vol. 5 (9) pp. 2270-2282; Lee et al. Shotgun cross-linking analysis for studying quaternary and tertiary protein structures. J Proteome Res (2007) vol. 6 (10) pp. 3908-3941	# Cross-links mapped in publication on NMR structure 1akk
intra	P00004	P00004	CYC_HORSE	CYC_HORSE	1hrc	PDB	A	A	6	88	5	87	LYS	LYS	CB	CB	82	11.5	14.4	DSG,BS3	http://pubs.acs.org/doi/abs/10.1021/pr060154z; http://pubs.acs.org/doi/abs/10.1021/pr070234i	Seebacher et al. Protein cross-linking analysis using mass spectrometry, isotope-coded cross-linkers, and integrated computational data processing. J Proteome Res (2006) vol. 5 (9) pp. 2270-2282; Lee et al. Shotgun cross-linking analysis for studying quaternary and tertiary protein structures. J Proteome Res (2007) vol. 6 (10) pp. 3908-3941	# Cross-links mapped in publication on NMR structure 1akk
intra	P00698	P00698	LYSC_CHICK	LYSC_CHICK	2lym	PDB	A	A	31	134	13	116	LYS	LYS	CB	CB	103	20.8	31.6	DSS,BS3	http://pubs.acs.org/doi/abs/10.1021/pr060154z; http://pubs.acs.org/doi/abs/10.1021/pr1001115	Seebacher et al. Protein cross-linking analysis using mass spectrometry, isotope-coded cross-linkers, and integrated computational data processing. J Proteome Res (2006) vol. 5 (9) pp. 2270-2282;Zelter et al. Isotope Signatures Allow Identification of Chemically Cross-Linked Peptides by Mass Spectrometry: A Novel Method to Determine Interresidue Distances in Protein Structures through Cross-Linki…
intra	P00004	P00004	CYC_HORSE	CYC_HORSE	1hrc	PDB	A	A	100	101	99	100	LYS	LYS	CB	CB	1	5.1	5.5	BS3	http://pubs.acs.org/doi/abs/10.1021/pr070234i	Lee et al. Shotgun cross-linking analysis for studying quaternary and tertiary protein structures. J Proteome Res (2007) vol. 6 (10) pp. 3908-3917	# Cross-links mapped in publication on NMR structure 1akk
intra	P00004	P00004	CYC_HORSE	CYC_HORSE	1hrc	PDB	A	A	23	26	22	25	LYS	LYS	CB	CB	3	11.4	17.6	BS3	http://pubs.acs.org/doi/abs/10.1021/pr070234i	Lee et al. Shotgun cross-linking analysis for studying quaternary and tertiary protein structures. J Proteome Res (2007) vol. 6 (10) pp. 3908-3917	# Cross-links mapped in publication on NMR structure 1akk
intra	P00004	P00004	CYC_HORSE	CYC_HORSE	1hrc	PDB	A	A	40	101	39	100	LYS	LYS	CB	CB	61	21	32.5	BS3	http://pubs.acs.org/doi/abs/10.1021/pr070234i	Lee et al. Shotgun cross-linking analysis for studying quaternary and tertiary protein structures. J Proteome Res (2007) vol. 6 (10) pp. 3908-3917	# Cross-links mapped in publication on NMR structure 1akk
intra	P00004	P00004	CYC_HORSE	CYC_HORSE	1hrc	PDB	A	A	54	56	53	55	LYS	LYS	CB	CB	2	7.5	9.7	BS3	http://pubs.acs.org/doi/abs/10.1021/pr070234i	Lee et al. Shotgun cross-linking analysis for studying quaternary and tertiary protein structures. J Proteome Res (2007) vol. 6 (10) pp. 3908-3917	# Cross-links mapped in publication on NMR structure 1akk
intra	P00004	P00004	CYC_HORSE	CYC_HORSE	1hrc	PDB	A	A	56	61	55	60	LYS	LYS	CB	CB	5	13.4	21.2	BS3	http://pubs.acs.org/doi/abs/10.1021/pr070234i	Lee et al. Shotgun cross-linking analysis for studying quaternary and tertiary protein structures. J Proteome Res (2007) vol. 6 (10) pp. 3908-3917	# Cross-links mapped in publication on NMR structure 1akk
intra	P00004	P00004	CYC_HORSE	CYC_HORSE	1hrc	PDB	A	A	6	9	5	8	LYS	LYS	CB	CB	3	6.1	6.1	BS3	http://pubs.acs.org/doi/abs/10.1021/pr070234i	Lee et al. Shotgun cross-linking analysis for studying quaternary and tertiary protein structures. J Proteome Res (2007) vol. 6 (10) pp. 3908-3917	# Cross-links mapped in publication on NMR structure 1akk
intra	P00004	P00004	CYC_HORSE	CYC_HORSE	1hrc	PDB	A	A	61	80	60	79	LYS	LYS	CB	CB	19	22.7	35.6	BS3	http://pubs.acs.org/doi/abs/10.1021/pr070234i	Lee et al. Shotgun cross-linking analysis for studying quaternary and tertiary protein structures. J Proteome Res (2007) vol. 6 (10) pp. 3908-3917	# Cross-links mapped in publication on NMR structure 1akk
intra	P00004	P00004	CYC_HORSE	CYC_HORSE	1hrc	PDB	A	A	73	100	72	99	LYS	LYS	CB	CB	27	23.8	39.8	BS3	http://pubs.acs.org/doi/abs/10.1021/pr070234i	Lee et al. Shotgun cross-linking analysis for studying quaternary and tertiary protein structures. J Proteome Res (2007) vol. 6 (10) pp. 3908-3917	# Cross-links mapped in publication on NMR structure 1akk
intra	P00004	P00004	CYC_HORSE	CYC_HORSE	1hrc	PDB	A	A	73	74	72	73	LYS	LYS	CB	CB	1	5.4	7.5	BS3	http://pubs.acs.org/doi/abs/10.1021/pr070234i	Lee et al. Shotgun cross-linking analysis for studying quaternary and tertiary protein structures. J Proteome Res (2007) vol. 6 (10) pp. 3908-3917	# Cross-links mapped in publication on NMR structure 1akk
intra	P00004	P00004	CYC_HORSE	CYC_HORSE	1hrc	PDB	A	A	73	80	72	79	LYS	LYS	CB	CB	7	9.9	13.1	BS3	http://pubs.acs.org/doi/abs/10.1021/pr070234i	Lee et al. Shotgun cross-linking analysis for studying quaternary and tertiary protein structures. J Proteome Res (2007) vol. 6 (10) pp. 3908-3917	# Cross-links mapped in publication on NMR structure 1akk
intra	P00004	P00004	CYC_HORSE	CYC_HORSE	1hrc	PDB	A	A	74	80	73	79	LYS	LYS	CB	CB	6	14.6	21.8	BS3	http://pubs.acs.org/doi/abs/10.1021/pr070234i	Lee et al. Shotgun cross-linking analysis for studying quaternary and tertiary protein structures. J Proteome Res (2007) vol. 6 (10) pp. 3908-3917	# Cross-links mapped in publication on NMR structure 1akk
intra	P00004	P00004	CYC_HORSE	CYC_HORSE	1hrc	PDB	A	A	74	89	73	88	LYS	LYS	CB	CB	15	16	18.7	BS3	http://pubs.acs.org/doi/abs/10.1021/pr070234i	Lee et al. Shotgun cross-linking analysis for studying quaternary and tertiary protein structures. J Proteome Res (2007) vol. 6 (10) pp. 3908-3917	# Cross-links mapped in publication on NMR structure 1akk
intra	P00004	P00004	CYC_HORSE	CYC_HORSE	1hrc	PDB	A	A	8	28	7	27	LYS	LYS	CB	CB	20	17.4	19.8	BS3	http://pubs.acs.org/doi/abs/10.1021/pr070234i	Lee et al. Shotgun cross-linking analysis for studying quaternary and tertiary protein structures. J Proteome Res (2007) vol. 6 (10) pp. 3908-3917	# Cross-links mapped in publication on NMR structure 1akk
intra	P00004	P00004	CYC_HORSE	CYC_HORSE	1hrc	PDB	A	A	8	9	7	8	LYS	LYS	CB	CB	1	5.4	6.6	BS3	http://pubs.acs.org/doi/abs/10.1021/pr070234i	Lee et al. Shotgun cross-linking analysis for studying quaternary and tertiary protein structures. J Proteome Res (2007) vol. 6 (10) pp. 3908-3917	# Cross-links mapped in publication on NMR structure 1akk
intra	P00004	P00004	CYC_HORSE	CYC_HORSE	1hrc	PDB	A	A	87	88	86	87	LYS	LYS	CB	CB	1	5.2	5.9	BS3	http://pubs.acs.org/doi/abs/10.1021/pr070234i	Lee et al. Shotgun cross-linking analysis for studying quaternary and tertiary protein structures. J Proteome Res (2007) vol. 6 (10) pp. 3908-3917	# Cross-links mapped in publication on NMR structure 1akk
intra	P00004	P00004	CYC_HORSE	CYC_HORSE	1hrc	PDB	A	A	87	89	86	88	LYS	LYS	CB	CB	2	8.6	9.6	BS3	http://pubs.acs.org/doi/abs/10.1021/pr070234i	Lee et al. Shotgun cross-linking analysis for studying quaternary and tertiary protein structures. J Proteome Res (2007) vol. 6 (10) pp. 3908-3917	# Cross-links mapped in publication on NMR structure 1akk
intra	P00004	P00004	CYC_HORSE	CYC_HORSE	1hrc	PDB	A	A	88	101	87	100	LYS	LYS	CB	CB	13	19.8	32.6	BS3	http://pubs.acs.org/doi/abs/10.1021/pr070234i	Lee et al. Shotgun cross-linking analysis for studying quaternary and tertiary protein structures. J Proteome Res (2007) vol. 6 (10) pp. 3908-3917	# Cross-links mapped in publication on NMR structure 1akk
intra	P00004	P00004	CYC_HORSE	CYC_HORSE	1hrc	PDB	A	A	9	101	8	100	LYS	LYS	CB	CB	92	13.5	19.4	BS3	http://pubs.acs.org/doi/abs/10.1021/pr070234i	Lee et al. Shotgun cross-linking analysis for studying quaternary and tertiary protein structures. J Proteome Res (2007) vol. 6 (10) pp. 3908-3917	# Cross-links mapped in publication on NMR structure 1akk
intra	P00004	P00004	CYC_HORSE	CYC_HORSE	1hrc	PDB	A	A	9	14	8	13	LYS	LYS	CB	CB	5	9.4	14.3	BS3	http://pubs.acs.org/doi/abs/10.1021/pr070234i	Lee et al. Shotgun cross-linking analysis for studying quaternary and tertiary protein structures. J Proteome Res (2007) vol. 6 (10) pp. 3908-3917	# Cross-links mapped in publication on NMR structure 1akk
intra	P00004	P00004	CYC_HORSE	CYC_HORSE	1hrc	PDB	A	A	9	88	8	87	LYS	LYS	CB	CB	79	13.7	16.8	BS3	http://pubs.acs.org/doi/abs/10.1021/pr070234i	Lee et al. Shotgun cross-linking analysis for studying quaternary and tertiary protein structures. J Proteome Res (2007) vol. 6 (10) pp. 3908-3917	# Cross-links mapped in publication on NMR structure 1akk
intra	P00004	P00004	CYC_HORSE	CYC_HORSE	1hrc	PDB	A	A	40	56	39	55	LYS	LYS	CB	CB	16	7.9	16.9	BS3	http://pubs.acs.org/doi/abs/10.1021/pr070234i; http://pubs.acs.org/doi/pdf/10.1021/ac101586z	Lee et al. Shotgun cross-linking analysis for studying quaternary and tertiary protein structures. J Proteome Res (2007) vol. 6 (10) pp. 3908-3917	# Cross-links mapped in publication on NMR structure 1akk
intra	P00004	P00004	CYC_HORSE	CYC_HORSE	1hrc	PDB	A	A	40	61	39	60	LYS	LYS	CB	CB	21	10.9	18	BS3	http://pubs.acs.org/doi/abs/10.1021/pr070234i; http://pubs.acs.org/doi/pdf/10.1021/ac101586z	Lee et al. Shotgun cross-linking analysis for studying quaternary and tertiary protein structures. J Proteome Res (2007) vol. 6 (10) pp. 3908-3917	# Cross-links mapped in publication on NMR structure 1akk
intra	P00004	P00004	CYC_HORSE	CYC_HORSE	1hrc	PDB	A	A	54	80	53	79	LYS	LYS	CB	CB	26	11.4	19.9	BS3	http://pubs.acs.org/doi/abs/10.1021/pr070234i; http://pubs.acs.org/doi/pdf/10.1021/ac101586z	Lee et al. Shotgun cross-linking analysis for studying quaternary and tertiary protein structures. J Proteome Res (2007) vol. 6 (10) pp. 3908-3917	# Cross-links mapped in publication on NMR structure 1akk
intra	P00004	P00004	CYC_HORSE	CYC_HORSE	1hrc	PDB	A	A	56	73	55	72	LYS	LYS	CB	CB	17	12.2	22.7	BS3	http://pubs.acs.org/doi/abs/10.1021/pr070234i; http://pubs.acs.org/doi/pdf/10.1021/ac101586z	Lee et al. Shotgun cross-linking analysis for studying quaternary and tertiary protein structures. J Proteome Res (2007) vol. 6 (10) pp. 3908-3917	# Cross-links mapped in publication on NMR structure 1akk
intra	P00004	P00004	CYC_HORSE	CYC_HORSE	1hrc	PDB	A	A	56	74	55	73	LYS	LYS	CB	CB	18	11.9	17.9	BS3	http://pubs.acs.org/doi/abs/10.1021/pr070234i; http://pubs.acs.org/doi/pdf/10.1021/ac101586z	Lee et al. Shotgun cross-linking analysis for studying quaternary and tertiary protein structures. J Proteome Res (2007) vol. 6 (10) pp. 3908-3917	# Cross-links mapped in publication on NMR structure 1akk
intra	P00004	P00004	CYC_HORSE	CYC_HORSE	1hrc	PDB	A	A	61	87	60	86	LYS	LYS	CB	CB	26	21.3	30.3	BS3	http://pubs.acs.org/doi/abs/10.1021/pr070234i; http://pubs.acs.org/doi/pdf/10.1021/ac101586z	Lee et al. Shotgun cross-linking analysis for studying quaternary and tertiary protein structures. J Proteome Res (2007) vol. 6 (10) pp. 3908-3917	# Cross-links mapped in publication on NMR structure 1akk
intra	P00004	P00004	CYC_HORSE	CYC_HORSE	1hrc	PDB	A	A	73	87	72	86	LYS	LYS	CB	CB	14	14.5	17.6	BS3	http://pubs.acs.org/doi/abs/10.1021/pr070234i; http://pubs.acs.org/doi/pdf/10.1021/ac101586z	Lee et al. Shotgun cross-linking analysis for studying quaternary and tertiary protein structures. J Proteome Res (2007) vol. 6 (10) pp. 3908-3917	# Cross-links mapped in publication on NMR structure 1akk
intra	P00004	P00004	CYC_HORSE	CYC_HORSE	1hrc	PDB	A	A	74	87	73	86	LYS	LYS	CB	CB	13	13	16.2	BS3	http://pubs.acs.org/doi/abs/10.1021/pr070234i; http://pubs.acs.org/doi/pdf/10.1021/ac101586z	Lee et al. Shotgun cross-linking analysis for studying quaternary and tertiary protein structures. J Proteome Res (2007) vol. 6 (10) pp. 3908-3917	# Cross-links mapped in publication on NMR structure 1akk
intra	P00004	P00004	CYC_HORSE	CYC_HORSE	1hrc	PDB	A	A	89	100	88	99	LYS	LYS	CB	CB	11	16.5	20	BS3	http://pubs.acs.org/doi/abs/10.1021/pr070234i; http://pubs.acs.org/doi/pdf/10.1021/ac101586z	Lee et al. Shotgun cross-linking analysis for studying quaternary and tertiary protein structures. J Proteome Res (2007) vol. 6 (10) pp. 3908-3917	# Cross-links mapped in publication on NMR structure 1akk
intra	P02754	P02754	LACB_BOVIN	LACB_BOVIN	1bsq	PDB	A	A	151	157	135	141	LYS	LYS	CB	CB	6	11.1	17.6	BS3	http://pubs.acs.org/doi/abs/10.1021/pr1001115	Zelter et al. Isotope Signatures Allow Identification of Chemically Cross-Linked Peptides by Mass Spectrometry: A Novel Method to Determine Interresidue Distances in Protein Structures through Cross-Linking. J Proteome Res (2010) vol. 9 (7) pp. 3583-3589
intra	P02754	P02754	LACB_BOVIN	LACB_BOVIN	1bsq	PDB	A	A	63	85	47	69	LYS	LYS	CB	CB	22	13.6	22.7	BS3	http://pubs.acs.org/doi/abs/10.1021/pr1001115	Zelter et al. Isotope Signatures Allow Identification of Chemically Cross-Linked Peptides by Mass Spectrometry: A Novel Method to Determine Interresidue Distances in Protein Structures through Cross-Linking. J Proteome Res (2010) vol. 9 (7) pp. 3583-3589
intra	P02754	P02754	LACB_BOVIN	LACB_BOVIN	1bsq	PDB	A	A	93	107	77	91	LYS	LYS	CB	CB	14	12.4	14.3	BS3	http://pubs.acs.org/doi/abs/10.1021/pr1001115	Zelter et al. Isotope Signatures Allow Identification of Chemically Cross-Linked Peptides by Mass Spectrometry: A Novel Method to Determine Interresidue Distances in Protein Structures through Cross-Linking. J Proteome Res (2010) vol. 9 (7) pp. 3583-3589
intra	P02754	P02754	LACB_BOVIN	LACB_BOVIN	1bsq	PDB	A	A	154	157	138	141	LYS	LYS	CB	CB	3	6.1	6.8	BS3	http://pubs.acs.org/doi/abs/10.1021/pr1001115	Zelter et al. Isotope Signatures Allow Identification of Chemically Cross-Linked Peptides by Mass Spectrometry: A Novel Method to Determine Interresidue Distances in Protein Structures through Cross-Linking. J Proteome Res (2010) vol. 9 (7) pp. 3583-3589
inter	P38398	Q99728	BRCA1_HUMAN	BARD1_HUMAN	1jm7	PDB	A	B	20	110	20	110	LYS	LYS	CB	CB	1956	12.3	17	BS3	http://pubs.acs.org/doi/abs/10.1021/pr1001115	Zelter et al. Isotope Signatures Allow Identification of Chemically Cross-Linked Peptides by Mass Spectrometry: A Novel Method to Determine Interresidue Distances in Protein Structures through Cross-Linking. J Proteome Res (2010) vol. 9 (7) pp. 3583-3589
intra	P38398	P38398	BRCA1_HUMAN	BRCA1_HUMAN	1jm7	PDB	A	A	45	70	45	70	LYS	LYS	CB	CB	181	10.6	12.7	BS3	http://pubs.acs.org/doi/abs/10.1021/pr1001115	Zelter et al. Isotope Signatures Allow Identification of Chemically Cross-Linked Peptides by Mass Spectrometry: A Novel Method to Determine Interresidue Distances in Protein Structures through Cross-Linking. J Proteome Res (2010) vol. 9 (7) pp. 3583-3589
intra	P38398	P38398	BRCA1_HUMAN	BRCA1_HUMAN	1jm7	PDB	A	A	50	70	50	70	LYS	LYS	CB	CB	20	11.4	23.6	BS3	http://pubs.acs.org/doi/abs/10.1021/pr1001115	Zelter et al. Isotope Signatures Allow Identification of Chemically Cross-Linked Peptides by Mass Spectrometry: A Novel Method to Determine Interresidue Distances in Protein Structures through Cross-Linking. J Proteome Res (2010) vol. 9 (7) pp. 3583-3589
intra	P38398	P38398	BRCA1_HUMAN	BRCA1_HUMAN	1jm7	PDB	A	A	38	70	38	70	LYS	LYS	CB	CB	959	8.7	24.5	BS3	http://pubs.acs.org/doi/abs/10.1021/pr1001115	Zelter et al. Isotope Signatures Allow Identification of Chemically Cross-Linked Peptides by Mass Spectrometry: A Novel Method to Determine Interresidue Distances in Protein Structures through Cross-Linking. J Proteome Res (2010) vol. 9 (7) pp. 3583-3589
intra	P38398	P38398	BRCA1_HUMAN	BRCA1_HUMAN	1jm7	PDB	A	A	50	56	50	56	LYS	LYS	CB	CB	1242	10.6	19.2	BS3	http://pubs.acs.org/doi/abs/10.1021/pr1001115	Zelter et al. Isotope Signatures Allow Identification of Chemically Cross-Linked Peptides by Mass Spectrometry: A Novel Method to Determine Interresidue Distances in Protein Structures through Cross-Linking. J Proteome Res (2010) vol. 9 (7) pp. 3583-3589
intra	P38398	P38398	BRCA1_HUMAN	BRCA1_HUMAN	1jm7	PDB	A	A	56	70	56	70	LYS	LYS	CB	CB	1119	8.9	16.9	BS3	http://pubs.acs.org/doi/abs/10.1021/pr1001115	Zelter et al. Isotope Signatures Allow Identification of Chemically Cross-Linked Peptides by Mass Spectrometry: A Novel Method to Determine Interresidue Distances in Protein Structures through Cross-Linking. J Proteome Res (2010) vol. 9 (7) pp. 3583-3589
intra	P42212	P42212	GFP_AEQVI	GFP_AEQVI	2hgd	PDB	A	A	101	131	101	131	LYS	LYS	CB	CB	30	11.7	19.2	BS3	http://pubs.acs.org/doi/abs/10.1021/pr1001115	Zelter et al. Isotope Signatures Allow Identification of Chemically Cross-Linked Peptides by Mass Spectrometry: A Novel Method to Determine Interresidue Distances in Protein Structures through Cross-Linking. J Proteome Res (2010) vol. 9 (7) pp. 3583-3589
intra	P42212	P42212	GFP_AEQVI	GFP_AEQVI	2hgd	PDB	A	A	107	126	107	126	LYS	LYS	CB	CB	19	4.7	5.7	BS3	http://pubs.acs.org/doi/abs/10.1021/pr1001115	Zelter et al. Isotope Signatures Allow Identification of Chemically Cross-Linked Peptides by Mass Spectrometry: A Novel Method to Determine Interresidue Distances in Protein Structures through Cross-Linking. J Proteome Res (2010) vol. 9 (7) pp. 3583-3589
intra	P42212	P42212	GFP_AEQVI	GFP_AEQVI	2hgd	PDB	A	A	107	162	107	162	LYS	LYS	CB	CB	55	16	18.4	BS3	http://pubs.acs.org/doi/abs/10.1021/pr1001115	Zelter et al. Isotope Signatures Allow Identification of Chemically Cross-Linked Peptides by Mass Spectrometry: A Novel Method to Determine Interresidue Distances in Protein Structures through Cross-Linking. J Proteome Res (2010) vol. 9 (7) pp. 3583-3589
intra	P42212	P42212	GFP_AEQVI	GFP_AEQVI	2hgd	PDB	A	A	101	166	101	166	LYS	LYS	CB	CB	65	9.3	11.6	BS3	http://pubs.acs.org/doi/abs/10.1021/pr1001115	Zelter et al. Isotope Signatures Allow Identification of Chemically Cross-Linked Peptides by Mass Spectrometry: A Novel Method to Determine Interresidue Distances in Protein Structures through Cross-Linking. J Proteome Res (2010) vol. 9 (7) pp. 3583-3589
intra	P42212	P42212	GFP_AEQVI	GFP_AEQVI	2hgd	PDB	A	A	156	162	156	162	LYS	LYS	CB	CB	6	10.3	14.4	BS3	http://pubs.acs.org/doi/abs/10.1021/pr1001115	Zelter et al. Isotope Signatures Allow Identification of Chemically Cross-Linked Peptides by Mass Spectrometry: A Novel Method to Determine Interresidue Distances in Protein Structures through Cross-Linking. J Proteome Res (2010) vol. 9 (7) pp. 3583-3589
intra	P00698	P00698	LYSC_CHICK	LYSC_CHICK	2lym	PDB	A	A	31	51	13	33	LYS	LYS	CB	CB	20	15.9	39.5	BS3	http://pubs.acs.org/doi/abs/10.1021/pr1001115	Zelter et al. Isotope Signatures Allow Identification of Chemically Cross-Linked Peptides by Mass Spectrometry: A Novel Method to Determine Interresidue Distances in Protein Structures through Cross-Linking. J Proteome Res (2010) vol. 9 (7) pp. 3583-3589
intra	P00698	P00698	LYSC_CHICK	LYSC_CHICK	2lym	PDB	A	A	51	134	33	116	LYS	LYS	CB	CB	83	13.5	24.4	BS3	http://pubs.acs.org/doi/abs/10.1021/pr1001115	Zelter et al. Isotope Signatures Allow Identification of Chemically Cross-Linked Peptides by Mass Spectrometry: A Novel Method to Determine Interresidue Distances in Protein Structures through Cross-Linking. J Proteome Res (2010) vol. 9 (7) pp. 3583-3589
intra	P61823	P61823	RNAS1_BOVIN	RNAS1_BOVIN	3rsp	PDB	A	A	57	63	31	37	LYS	LYS	CB	CB	6	9.1	12.8	BS3	http://pubs.acs.org/doi/abs/10.1021/pr1001115	Zelter et al. Isotope Signatures Allow Identification of Chemically Cross-Linked Peptides by Mass Spectrometry: A Novel Method to Determine Interresidue Distances in Protein Structures through Cross-Linking. J Proteome Res (2010) vol. 9 (7) pp. 3583-3589
intra	P61823	P61823	RNAS1_BOVIN	RNAS1_BOVIN	3rsp	PDB	A	A	63	67	37	41	LYS	LYS	CB	CB	4	9.1	12.2	BS3	http://pubs.acs.org/doi/abs/10.1021/pr1001115	Zelter et al. Isotope Signatures Allow Identification of Chemically Cross-Linked Peptides by Mass Spectrometry: A Novel Method to Determine Interresidue Distances in Protein Structures through Cross-Linking. J Proteome Res (2010) vol. 9 (7) pp. 3583-3589
inter	P62152	P07313	CALM_DROME	MYLK2_RABIT	2bbm	PDB	A	B	76	596	75	18	LYS	LYS	CB	CB	91	18.5	20.8	BS3	http://pubs.acs.org/doi/pdf/10.1021/ac0487294	Kalkhof et al. Chemical cross-linking and high-performance Fourier transform ion cyclotron resonance mass spectrometry for protein interaction analysis: Application to a calmodulin/target peptide complex. Anal Chem (2005) vol. 77 (2) pp. 495-503
inter	P62152	P07313	CALM_DROME	MYLK2_RABIT	2bbm	PDB	A	B	76	597	75	19	LYS	LYS	CB	CB	92	14.7	16.7	Sulfo-EGS,BS3	http://pubs.acs.org/doi/pdf/10.1021/ac0487294	Kalkhof et al. Chemical cross-linking and high-performance Fourier transform ion cyclotron resonance mass spectrometry for protein interaction analysis: Application to a calmodulin/target peptide complex. Anal Chem (2005) vol. 77 (2) pp. 495-503
inter	P62152	P07313	CALM_DROME	MYLK2_RABIT	2bbm	PDB	A	B	78	596	77	18	LYS	LYS	CB	CB	89	23	27.8	Sulfo-EGS,BS3,DSA-d0	http://pubs.acs.org/doi/pdf/10.1021/ac0487294	Kalkhof et al. Chemical cross-linking and high-performance Fourier transform ion cyclotron resonance mass spectrometry for protein interaction analysis: Application to a calmodulin/target peptide complex. Anal Chem (2005) vol. 77 (2) pp. 495-503
inter	P62152	P07313	CALM_DROME	MYLK2_RABIT	2bbm	PDB	A	B	78	597	77	19	LYS	LYS	CB	CB	90	18.4	23.6	BS3	http://pubs.acs.org/doi/pdf/10.1021/ac0487294	Kalkhof et al. Chemical cross-linking and high-performance Fourier transform ion cyclotron resonance mass spectrometry for protein interaction analysis: Application to a calmodulin/target peptide complex. Anal Chem (2005) vol. 77 (2) pp. 495-503
intra	P00004	P00004	CYC_HORSE	CYC_HORSE	1hrc	PDB	A	A	23	101	22	100	LYS	LYS	CB	CB	78	13.3	17.9	DEST	http://pubs.acs.org/doi/pdf/10.1021/ac101586z	Lauber and Reilly. Novel Amidinating Cross-Linker for Facilitating Analyses of Protein Structures and Interactions. Anal Chem (2010) vol. 82 (18) pp. 7736-7743
intra	P00004	P00004	CYC_HORSE	CYC_HORSE	1hrc	PDB	A	A	28	74	27	73	LYS	LYS	CB	CB	46	23.4	36.1	DEST	http://pubs.acs.org/doi/pdf/10.1021/ac101586z	Lauber and Reilly. Novel Amidinating Cross-Linker for Facilitating Analyses of Protein Structures and Interactions. Anal Chem (2010) vol. 82 (18) pp. 7736-7743
intra	P00004	P00004	CYC_HORSE	CYC_HORSE	1hrc	PDB	A	A	28	80	27	79	LYS	LYS	CB	CB	52	12.9	20.2	DEST	http://pubs.acs.org/doi/pdf/10.1021/ac101586z	Lauber and Reilly. Novel Amidinating Cross-Linker for Facilitating Analyses of Protein Structures and Interactions. Anal Chem (2010) vol. 82 (18) pp. 7736-7743
intra	P00004	P00004	CYC_HORSE	CYC_HORSE	1hrc	PDB	A	A	28	87	27	86	LYS	LYS	CB	CB	59	24.3	32.5	DEST	http://pubs.acs.org/doi/pdf/10.1021/ac101586z	Lauber and Reilly. Novel Amidinating Cross-Linker for Facilitating Analyses of Protein Structures and Interactions. Anal Chem (2010) vol. 82 (18) pp. 7736-7743
intra	P00004	P00004	CYC_HORSE	CYC_HORSE	1hrc	PDB	A	A	40	73	39	72	LYS	LYS	CB	CB	33	19.3	37.7	DEST	http://pubs.acs.org/doi/pdf/10.1021/ac101586z	Lauber and Reilly. Novel Amidinating Cross-Linker for Facilitating Analyses of Protein Structures and Interactions. Anal Chem (2010) vol. 82 (18) pp. 7736-7743
intra	P00004	P00004	CYC_HORSE	CYC_HORSE	1hrc	PDB	A	A	54	74	53	73	LYS	LYS	CB	CB	20	17.7	26.2	DEST	http://pubs.acs.org/doi/pdf/10.1021/ac101586z	Lauber and Reilly. Novel Amidinating Cross-Linker for Facilitating Analyses of Protein Structures and Interactions. Anal Chem (2010) vol. 82 (18) pp. 7736-7743
intra	P00004	P00004	CYC_HORSE	CYC_HORSE	1hrc	PDB	A	A	6	14	5	13	LYS	LYS	CB	CB	8	12.7	16.3	DEST	http://pubs.acs.org/doi/pdf/10.1021/ac101586z	Lauber and Reilly. Novel Amidinating Cross-Linker for Facilitating Analyses of Protein Structures and Interactions. Anal Chem (2010) vol. 82 (18) pp. 7736-7743
intra	P00004	P00004	CYC_HORSE	CYC_HORSE	1hrc	PDB	A	A	8	40	7	39	LYS	LYS	CB	CB	32	25.7	41.3	DEST	http://pubs.acs.org/doi/pdf/10.1021/ac101586z	Lauber and Reilly. Novel Amidinating Cross-Linker for Facilitating Analyses of Protein Structures and Interactions. Anal Chem (2010) vol. 82 (18) pp. 7736-7743
intra	P00004	P00004	CYC_HORSE	CYC_HORSE	1hrc	PDB	A	A	88	100	87	99	LYS	LYS	CB	CB	12	18.5	31.3	DEST	http://pubs.acs.org/doi/pdf/10.1021/ac101586z	Lauber and Reilly. Novel Amidinating Cross-Linker for Facilitating Analyses of Protein Structures and Interactions. Anal Chem (2010) vol. 82 (18) pp. 7736-7743
intra	P23254	P23254	TKT1_YEAST	TKT1_YEAST	1trk	PDB	B	B	303	311	303	311	LYS	LYS	CB	CB	8	12.9	18.1	BS3	http://uwspace.uwaterloo.ca/handle/10012/1228	Mak. Using Chemical Crosslinking and Mass Spectrometry for Protein Model Validation and Fold Recognition. Citeseer (2007)
intra	P23254	P23254	TKT1_YEAST	TKT1_YEAST	1trk	PDB	A	A	303	314	303	314	LYS	LYS	CB	CB	11	17	20.1	BS3	http://uwspace.uwaterloo.ca/handle/10012/1228	Mak. Using Chemical Crosslinking and Mass Spectrometry for Protein Model Validation and Fold Recognition. Citeseer (2007)
intra	P23254	P23254	TKT1_YEAST	TKT1_YEAST	1trk	PDB	B	B	311	321	311	321	LYS	LYS	CB	CB	10	16.1	21.5	BS3	http://uwspace.uwaterloo.ca/handle/10012/1228	Mak. Using Chemical Crosslinking and Mass Spectrometry for Protein Model Validation and Fold Recognition. Citeseer (2007)
intra	P23254	P23254	TKT1_YEAST	TKT1_YEAST	1trk	PDB	B	B	311	322	311	322	LYS	LYS	CB	CB	11	16.1	20.3	BS3	http://uwspace.uwaterloo.ca/handle/10012/1228	Mak. Using Chemical Crosslinking and Mass Spectrometry for Protein Model Validation and Fold Recognition. Citeseer (2007)
intra	P23254	P23254	TKT1_YEAST	TKT1_YEAST	1trk	PDB	A	A	345	392	345	392	LYS	LYS	CB	CB	47	16	17.5	BS3	http://uwspace.uwaterloo.ca/handle/10012/1228	Mak. Using Chemical Crosslinking and Mass Spectrometry for Protein Model Validation and Fold Recognition. Citeseer (2007)
intra	P23254	P23254	TKT1_YEAST	TKT1_YEAST	1trk	PDB	B	B	582	671	582	671	LYS	LYS	CB	CB	89	18.6	23.5	BS3	http://uwspace.uwaterloo.ca/handle/10012/1228	Mak. Using Chemical Crosslinking and Mass Spectrometry for Protein Model Validation and Fold Recognition. Citeseer (2007)
intra	P23254	P23254	TKT1_YEAST	TKT1_YEAST	1trk	PDB	A	A	9	276	9	276	LYS	LYS	CB	CB	267	15.1	20.1	BS3	http://uwspace.uwaterloo.ca/handle/10012/1228	Mak. Using Chemical Crosslinking and Mass Spectrometry for Protein Model Validation and Fold Recognition. Citeseer (2007)
intra	P23254	P23254	TKT1_YEAST	TKT1_YEAST	1trk	PDB	A	A	9	278	9	278	LYS	LYS	CB	CB	269	12.7	14.1	BS3	http://uwspace.uwaterloo.ca/handle/10012/1228	Mak. Using Chemical Crosslinking and Mass Spectrometry for Protein Model Validation and Fold Recognition. Citeseer (2007)
intra	P02768	P02768	ALBU_HUMAN	ALBU_HUMAN	1ao6	PDB	A	A	229	490	205	466	LYS	LYS	CB	CB	261	13.9	18.1	DSS,DSG,BS3	http://www.biochemj.org/bj/387/bj3870695.htm	Huang et al. Probing conformational changes of human serum albumin due to unsaturated fatty acid binding by chemical cross-linking and mass spectrometry. Biochem J (2005) vol. 387 pp. 695-702
intra	P02768	P02768	ALBU_HUMAN	ALBU_HUMAN	1ao6	PDB	B	B	236	264	212	240	LYS	LYS	CB	CB	28	10.7	14.9	DSS,DSG	http://www.biochemj.org/bj/387/bj3870695.htm	Huang et al. Probing conformational changes of human serum albumin due to unsaturated fatty acid binding by chemical cross-linking and mass spectrometry. Biochem J (2005) vol. 387 pp. 695-702
intra	P02768	P02768	ALBU_HUMAN	ALBU_HUMAN	1ao6	PDB	A	A	236	375	212	351	LYS	LYS	CB	CB	139	13.5	17.3	DSS,BS3	http://www.biochemj.org/bj/387/bj3870695.htm	Huang et al. Probing conformational changes of human serum albumin due to unsaturated fatty acid binding by chemical cross-linking and mass spectrometry. Biochem J (2005) vol. 387 pp. 695-702
intra	P02768	P02768	ALBU_HUMAN	ALBU_HUMAN	1ao6	PDB	A	A	300	310	276	286	LYS	LYS	CB	CB	10	11.4	20	DSS	http://www.biochemj.org/bj/387/bj3870695.htm	Huang et al. Probing conformational changes of human serum albumin due to unsaturated fatty acid binding by chemical cross-linking and mass spectrometry. Biochem J (2005) vol. 387 pp. 695-702
intra	P02768	P02768	ALBU_HUMAN	ALBU_HUMAN	1ao6	PDB	A	A	337	341	313	317	LYS	LYS	CB	CB	4	8.7	11.4	DSS,DSG	http://www.biochemj.org/bj/387/bj3870695.htm	Huang et al. Probing conformational changes of human serum albumin due to unsaturated fatty acid binding by chemical cross-linking and mass spectrometry. Biochem J (2005) vol. 387 pp. 695-702
intra	P02768	P02768	ALBU_HUMAN	ALBU_HUMAN	1ao6	PDB	B	B	375	383	351	359	LYS	LYS	CB	CB	8	13	17.5	DSS,DSG,BS3	http://www.biochemj.org/bj/387/bj3870695.htm	Huang et al. Probing conformational changes of human serum albumin due to unsaturated fatty acid binding by chemical cross-linking and mass spectrometry. Biochem J (2005) vol. 387 pp. 695-702
intra	P02768	P02768	ALBU_HUMAN	ALBU_HUMAN	1ao6	PDB	A	A	426	549	402	525	LYS	LYS	CB	CB	123	11.3	12.7	DSS,DSG,BS3	http://www.biochemj.org/bj/387/bj3870695.htm	Huang et al. Probing conformational changes of human serum albumin due to unsaturated fatty acid binding by chemical cross-linking and mass spectrometry. Biochem J (2005) vol. 387 pp. 695-702
intra	P02768	P02768	ALBU_HUMAN	ALBU_HUMAN	1ao6	PDB	A	A	426	565	402	541	LYS	LYS	CB	CB	139	15.4	21.3	DSS,DSG,BS3	http://www.biochemj.org/bj/387/bj3870695.htm	Huang et al. Probing conformational changes of human serum albumin due to unsaturated fatty acid binding by chemical cross-linking and mass spectrometry. Biochem J (2005) vol. 387 pp. 695-702
intra	P02768	P02768	ALBU_HUMAN	ALBU_HUMAN	1ao6	PDB	A	A	438	565	414	541	LYS	LYS	CB	CB	127	17	20.9	DSS	http://www.biochemj.org/bj/387/bj3870695.htm	Huang et al. Probing conformational changes of human serum albumin due to unsaturated fatty acid binding by chemical cross-linking and mass spectrometry. Biochem J (2005) vol. 387 pp. 695-702
intra	P02768	P02768	ALBU_HUMAN	ALBU_HUMAN	1ao6	PDB	A	A	460	463	436	439	LYS	LYS	CB	CB	3	7.2	8.9	DSS,DSG,BS3	http://www.biochemj.org/bj/387/bj3870695.htm	Huang et al. Probing conformational changes of human serum albumin due to unsaturated fatty acid binding by chemical cross-linking and mass spectrometry. Biochem J (2005) vol. 387 pp. 695-702
intra	P02768	P02768	ALBU_HUMAN	ALBU_HUMAN	1ao6	PDB	B	B	565	569	541	545	LYS	LYS	CB	CB	4	8.2	16.1	DSS,DSG,BS3	http://www.biochemj.org/bj/387/bj3870695.htm	Huang et al. Probing conformational changes of human serum albumin due to unsaturated fatty acid binding by chemical cross-linking and mass spectrometry. Biochem J (2005) vol. 387 pp. 695-702
intra	P02768	P02768	ALBU_HUMAN	ALBU_HUMAN	1ao6	PDB	B	B	88	97	64	73	LYS	LYS	CB	CB	9	10.9	13.9	DSS,DSG	http://www.biochemj.org/bj/387/bj3870695.htm	Huang et al. Probing conformational changes of human serum albumin due to unsaturated fatty acid binding by chemical cross-linking and mass spectrometry. Biochem J (2005) vol. 387 pp. 695-702
intra	P24627	P24627	TRFL_BOVIN	TRFL_BOVIN	1blf	PDB	A	A	296	301	277	282	LYS	LYS	CB	CB	5	6.1	7.6	DSS	http://www.mcponline.org/content/11/3/M111.014126	Leitner, A. et al. Expanding the chemical cross-linking toolbox by the use of multiple proteases and enrichment by size exclusion chromatography. Molecular & cellular proteomics (2012) vol.11 (3) M111.014126
intra	P24627	P24627	TRFL_BOVIN	TRFL_BOVIN	1blf	PDB	A	A	517	533	498	514	LYS	LYS	CB	CB	16	10.1	11.8	DSS	http://www.mcponline.org/content/11/3/M111.014127	Leitner, A. et al. Expanding the chemical cross-linking toolbox by the use of multiple proteases and enrichment by size exclusion chromatography. Molecular & cellular proteomics (2012) vol.11 (3) M111.014126
intra	P24627	P24627	TRFL_BOVIN	TRFL_BOVIN	1blf	PDB	A	A	375	539	356	520	LYS	LYS	CB	CB	164	11	13.4	DSS	http://www.mcponline.org/content/11/3/M111.014128	Leitner, A. et al. Expanding the chemical cross-linking toolbox by the use of multiple proteases and enrichment by size exclusion chromatography. Molecular & cellular proteomics (2012) vol.11 (3) M111.014126
intra	P24627	P24627	TRFL_BOVIN	TRFL_BOVIN	1blf	PDB	A	A	423	693	404	674	LYS	LYS	CB	CB	270	14	14.9	DSS	http://www.mcponline.org/content/11/3/M111.014129	Leitner, A. et al. Expanding the chemical cross-linking toolbox by the use of multiple proteases and enrichment by size exclusion chromatography. Molecular & cellular proteomics (2012) vol.11 (3) M111.014126
intra	P24627	P24627	TRFL_BOVIN	TRFL_BOVIN	1blf	PDB	A	A	118	132	99	113	LYS	LYS	CB	CB	14	12	16.1	DSS	http://www.mcponline.org/content/11/3/M111.014130	Leitner, A. et al. Expanding the chemical cross-linking toolbox by the use of multiple proteases and enrichment by size exclusion chromatography. Molecular & cellular proteomics (2012) vol.11 (3) M111.014126
intra	P24627	P24627	TRFL_BOVIN	TRFL_BOVIN	1blf	PDB	A	A	533	541	514	522	LYS	LYS	CB	CB	8	9	19.5	DSS	http://www.mcponline.org/content/11/3/M111.014131	Leitner, A. et al. Expanding the chemical cross-linking toolbox by the use of multiple proteases and enrichment by size exclusion chromatography. Molecular & cellular proteomics (2012) vol.11 (3) M111.014126
intra	P24627	P24627	TRFL_BOVIN	TRFL_BOVIN	1blf	PDB	A	A	92	332	73	313	LYS	LYS	CB	CB	240	14.6	17.3	DSS	http://www.mcponline.org/content/11/3/M111.014132	Leitner, A. et al. Expanding the chemical cross-linking toolbox by the use of multiple proteases and enrichment by size exclusion chromatography. Molecular & cellular proteomics (2012) vol.11 (3) M111.014126
intra	P24627	P24627	TRFL_BOVIN	TRFL_BOVIN	1blf	PDB	A	A	92	405	73	386	LYS	LYS	CB	CB	313	15.3	17.8	DSS	http://www.mcponline.org/content/11/3/M111.014133	Leitner, A. et al. Expanding the chemical cross-linking toolbox by the use of multiple proteases and enrichment by size exclusion chromatography. Molecular & cellular proteomics (2012) vol.11 (3) M111.014126
intra	P24627	P24627	TRFL_BOVIN	TRFL_BOVIN	1blf	PDB	A	A	119	240	100	221	LYS	LYS	CB	CB	121	12.6	18.8	DSS	http://www.mcponline.org/content/11/3/M111.014134	Leitner, A. et al. Expanding the chemical cross-linking toolbox by the use of multiple proteases and enrichment by size exclusion chromatography. Molecular & cellular proteomics (2012) vol.11 (3) M111.014126
intra	P24627	P24627	TRFL_BOVIN	TRFL_BOVIN	1blf	PDB	A	A	375	541	356	522	LYS	LYS	CB	CB	166	17.5	19.3	DSS	http://www.mcponline.org/content/11/3/M111.014135	Leitner, A. et al. Expanding the chemical cross-linking toolbox by the use of multiple proteases and enrichment by size exclusion chromatography. Molecular & cellular proteomics (2012) vol.11 (3) M111.014126
intra	P24627	P24627	TRFL_BOVIN	TRFL_BOVIN	1blf	PDB	A	A	132	193	113	174	LYS	LYS	CB	CB	61	13	18.3	DSS	http://www.mcponline.org/content/11/3/M111.014136	Leitner, A. et al. Expanding the chemical cross-linking toolbox by the use of multiple proteases and enrichment by size exclusion chromatography. Molecular & cellular proteomics (2012) vol.11 (3) M111.014126
intra	P24627	P24627	TRFL_BOVIN	TRFL_BOVIN	1blf	PDB	A	A	460	598	441	579	LYS	LYS	CB	CB	138	10.8	18.3	DSS	http://www.mcponline.org/content/11/3/M111.014137	Leitner, A. et al. Expanding the chemical cross-linking toolbox by the use of multiple proteases and enrichment by size exclusion chromatography. Molecular & cellular proteomics (2012) vol.11 (3) M111.014126
intra	P24627	P24627	TRFL_BOVIN	TRFL_BOVIN	1blf	PDB	A	A	92	348	73	329	LYS	LYS	CB	CB	256	18.1	21.4	DSS	http://www.mcponline.org/content/11/3/M111.014138	Leitner, A. et al. Expanding the chemical cross-linking toolbox by the use of multiple proteases and enrichment by size exclusion chromatography. Molecular & cellular proteomics (2012) vol.11 (3) M111.014126
intra	P24627	P24627	TRFL_BOVIN	TRFL_BOVIN	1blf	PDB	A	A	459	581	440	562	LYS	LYS	CB	CB	122	17	24.2	DSS	http://www.mcponline.org/content/11/3/M111.014139	Leitner, A. et al. Expanding the chemical cross-linking toolbox by the use of multiple proteases and enrichment by size exclusion chromatography. Molecular & cellular proteomics (2012) vol.11 (3) M111.014126
intra	P24627	P24627	TRFL_BOVIN	TRFL_BOVIN	1blf	PDB	A	A	332	517	313	498	LYS	LYS	CB	CB	185	20.3	23.1	DSS	http://www.mcponline.org/content/11/3/M111.014140	Leitner, A. et al. Expanding the chemical cross-linking toolbox by the use of multiple proteases and enrichment by size exclusion chromatography. Molecular & cellular proteomics (2012) vol.11 (3) M111.014126
intra	P24627	P24627	TRFL_BOVIN	TRFL_BOVIN	1blf	PDB	A	A	104	262	85	243	LYS	LYS	CB	CB	158	18.1	24.5	DSS	http://www.mcponline.org/content/11/3/M111.014141	Leitner, A. et al. Expanding the chemical cross-linking toolbox by the use of multiple proteases and enrichment by size exclusion chromatography. Molecular & cellular proteomics (2012) vol.11 (3) M111.014126
intra	P24627	P24627	TRFL_BOVIN	TRFL_BOVIN	1blf	PDB	A	A	581	652	562	633	LYS	LYS	CB	CB	71	18.5	25	DSS	http://www.mcponline.org/content/11/3/M111.014142	Leitner, A. et al. Expanding the chemical cross-linking toolbox by the use of multiple proteases and enrichment by size exclusion chromatography. Molecular & cellular proteomics (2012) vol.11 (3) M111.014126
intra	P24627	P24627	TRFL_BOVIN	TRFL_BOVIN	1blf	PDB	A	A	517	541	498	522	LYS	LYS	CB	CB	24	18.6	27.4	DSS	http://www.mcponline.org/content/11/3/M111.014143	Leitner, A. et al. Expanding the chemical cross-linking toolbox by the use of multiple proteases and enrichment by size exclusion chromatography. Molecular & cellular proteomics (2012) vol.11 (3) M111.014126
intra	P24627	P24627	TRFL_BOVIN	TRFL_BOVIN	1blf	PDB	A	A	348	358	329	339	LYS	LYS	CB	CB	10	13.9	19.6	DSS	http://www.mcponline.org/content/11/3/M111.014144	Leitner, A. et al. Expanding the chemical cross-linking toolbox by the use of multiple proteases and enrichment by size exclusion chromatography. Molecular & cellular proteomics (2012) vol.11 (3) M111.014126
intra	P24627	P24627	TRFL_BOVIN	TRFL_BOVIN	1blf	PDB	A	A	459	598	440	579	LYS	LYS	CB	CB	139	13.9	31.5	DSS	http://www.mcponline.org/content/11/3/M111.014145	Leitner, A. et al. Expanding the chemical cross-linking toolbox by the use of multiple proteases and enrichment by size exclusion chromatography. Molecular & cellular proteomics (2012) vol.11 (3) M111.014126
intra	P24627	P24627	TRFL_BOVIN	TRFL_BOVIN	1blf	PDB	A	A	262	423	243	404	LYS	LYS	CB	CB	161	28.4	34	DSS	http://www.mcponline.org/content/11/3/M111.014146	Leitner, A. et al. Expanding the chemical cross-linking toolbox by the use of multiple proteases and enrichment by size exclusion chromatography. Molecular & cellular proteomics (2012) vol.11 (3) M111.014126
intra	P24627	P24627	TRFL_BOVIN	TRFL_BOVIN	1blf	PDB	A	A	262	358	243	339	LYS	LYS	CB	CB	96	32.2	35.3	DSS	http://www.mcponline.org/content/11/3/M111.014147	Leitner, A. et al. Expanding the chemical cross-linking toolbox by the use of multiple proteases and enrichment by size exclusion chromatography. Molecular & cellular proteomics (2012) vol.11 (3) M111.014126
intra	P24627	P24627	TRFL_BOVIN	TRFL_BOVIN	1blf	PDB	A	A	474	598	455	579	LYS	LYS	CB	CB	124	21.1	40.7	DSS	http://www.mcponline.org/content/11/3/M111.014148	Leitner, A. et al. Expanding the chemical cross-linking toolbox by the use of multiple proteases and enrichment by size exclusion chromatography. Molecular & cellular proteomics (2012) vol.11 (3) M111.014126
intra	P24627	P24627	TRFL_BOVIN	TRFL_BOVIN	1blf	PDB	A	A	262	296	243	277	LYS	LYS	CB	CB	34	32.5	43.7	DSS	http://www.mcponline.org/content/11/3/M111.014149	Leitner, A. et al. Expanding the chemical cross-linking toolbox by the use of multiple proteases and enrichment by size exclusion chromatography. Molecular & cellular proteomics (2012) vol.11 (3) M111.014126
intra	P24627	P24627	TRFL_BOVIN	TRFL_BOVIN	1blf	PDB	A	A	320	348	301	329	LYS	LYS	CB	CB	28	25.1	33.5	DSS	http://www.mcponline.org/content/11/3/M111.014150	Leitner, A. et al. Expanding the chemical cross-linking toolbox by the use of multiple proteases and enrichment by size exclusion chromatography. Molecular & cellular proteomics (2012) vol.11 (3) M111.014126
intra	P24627	P24627	TRFL_BOVIN	TRFL_BOVIN	1blf	PDB	A	A	332	358	313	339	LYS	LYS	CB	CB	26	32.6	42.6	DSS	http://www.mcponline.org/content/11/3/M111.014151	Leitner, A. et al. Expanding the chemical cross-linking toolbox by the use of multiple proteases and enrichment by size exclusion chromatography. Molecular & cellular proteomics (2012) vol.11 (3) M111.014126
intra	P24627	P24627	TRFL_BOVIN	TRFL_BOVIN	1blf	PDB	A	A	132	262	113	243	LYS	LYS	CB	CB	130	27.5	53	DSS	http://www.mcponline.org/content/11/3/M111.014152	Leitner, A. et al. Expanding the chemical cross-linking toolbox by the use of multiple proteases and enrichment by size exclusion chromatography. Molecular & cellular proteomics (2012) vol.11 (3) M111.014126
intra	P24627	P24627	TRFL_BOVIN	TRFL_BOVIN	1blf	PDB	A	A	375	598	356	579	LYS	LYS	CB	CB	223	38.7	58.7	DSS	http://www.mcponline.org/content/11/3/M111.014153	Leitner, A. et al. Expanding the chemical cross-linking toolbox by the use of multiple proteases and enrichment by size exclusion chromatography. Molecular & cellular proteomics (2012) vol.11 (3) M111.014126
intra	P24627	P24627	TRFL_BOVIN	TRFL_BOVIN	1blf	PDB	A	A	358	598	339	579	LYS	LYS	CB	CB	240	57.3	-	DSS	http://www.mcponline.org/content/11/3/M111.014154	Leitner, A. et al. Expanding the chemical cross-linking toolbox by the use of multiple proteases and enrichment by size exclusion chromatography. Molecular & cellular proteomics (2012) vol.11 (3) M111.014126	# distance exceeds 80 Å SASD
intra	P24627	P24627	TRFL_BOVIN	TRFL_BOVIN	1blf	PDB	A	A	216	581	197	562	LYS	LYS	CB	CB	365	79.5	-	DSS	http://www.mcponline.org/content/11/3/M111.014155	Leitner, A. et al. Expanding the chemical cross-linking toolbox by the use of multiple proteases and enrichment by size exclusion chromatography. Molecular & cellular proteomics (2012) vol.11 (3) M111.014126	# 2nd amino acid seems solvent inaccessible
intra	P24627	P24627	TRFL_BOVIN	TRFL_BOVIN	1blf	PDB	A	A	193	598	174	579	LYS	LYS	CB	CB	405	84.2	-	DSS	http://www.mcponline.org/content/11/3/M111.014156	Leitner, A. et al. Expanding the chemical cross-linking toolbox by the use of multiple proteases and enrichment by size exclusion chromatography. Molecular & cellular proteomics (2012) vol.11 (3) M111.014126	# distance exceeds 80 Å SASD
intra	P00563	P00563	KCRM_RABIT	KCRM_RABIT	1u6r	PDB	A	A	366	369	365	368	LYS	LYS	CB	CB	3	5.8	6.1	DSS	http://www.mcponline.org/content/11/3/M111.014157	Leitner, A. et al. Expanding the chemical cross-linking toolbox by the use of multiple proteases and enrichment by size exclusion chromatography. Molecular & cellular proteomics (2012) vol.11 (3) M111.014126
intra	P00563	P00563	KCRM_RABIT	KCRM_RABIT	1u6r	PDB	B	B	365	369	364	368	LYS	LYS	CB	CB	4	6.6	6.6	DSS	http://www.mcponline.org/content/11/3/M111.014158	Leitner, A. et al. Expanding the chemical cross-linking toolbox by the use of multiple proteases and enrichment by size exclusion chromatography. Molecular & cellular proteomics (2012) vol.11 (3) M111.014126
intra	P00563	P00563	KCRM_RABIT	KCRM_RABIT	1u6r	PDB	A	A	15	40	14	39	LYS	LYS	CB	CB	25	8.7	12	DSS	http://www.mcponline.org/content/11/3/M111.014159	Leitner, A. et al. Expanding the chemical cross-linking toolbox by the use of multiple proteases and enrichment by size exclusion chromatography. Molecular & cellular proteomics (2012) vol.11 (3) M111.014126
intra	P00563	P00563	KCRM_RABIT	KCRM_RABIT	1u6r	PDB	A	A	116	247	115	246	LYS	LYS	CB	CB	131	9	14.5	DSS	http://www.mcponline.org/content/11/3/M111.014160	Leitner, A. et al. Expanding the chemical cross-linking toolbox by the use of multiple proteases and enrichment by size exclusion chromatography. Molecular & cellular proteomics (2012) vol.11 (3) M111.014126
intra	P00563	P00563	KCRM_RABIT	KCRM_RABIT	1u6r	PDB	B	B	259	266	258	265	LYS	LYS	CB	CB	7	10.7	13.2	DSS	http://www.mcponline.org/content/11/3/M111.014161	Leitner, A. et al. Expanding the chemical cross-linking toolbox by the use of multiple proteases and enrichment by size exclusion chromatography. Molecular & cellular proteomics (2012) vol.11 (3) M111.014126
intra	P00563	P00563	KCRM_RABIT	KCRM_RABIT	1u6r	PDB	B	B	101	105	100	104	LYS	LYS	CB	CB	4	9.7	15	DSS	http://www.mcponline.org/content/11/3/M111.014162	Leitner, A. et al. Expanding the chemical cross-linking toolbox by the use of multiple proteases and enrichment by size exclusion chromatography. Molecular & cellular proteomics (2012) vol.11 (3) M111.014126
intra	P00563	P00563	KCRM_RABIT	KCRM_RABIT	1u6r	PDB	A	A	138	265	137	264	LYS	LYS	CB	CB	127	9.4	14.9	DSS	http://www.mcponline.org/content/11/3/M111.014163	Leitner, A. et al. Expanding the chemical cross-linking toolbox by the use of multiple proteases and enrichment by size exclusion chromatography. Molecular & cellular proteomics (2012) vol.11 (3) M111.014126
intra	P00563	P00563	KCRM_RABIT	KCRM_RABIT	1u6r	PDB	B	B	40	45	39	44	LYS	LYS	CB	CB	5	11	19.2	DSS	http://www.mcponline.org/content/11/3/M111.014164	Leitner, A. et al. Expanding the chemical cross-linking toolbox by the use of multiple proteases and enrichment by size exclusion chromatography. Molecular & cellular proteomics (2012) vol.11 (3) M111.014126
intra	P00563	P00563	KCRM_RABIT	KCRM_RABIT	1u6r	PDB	B	B	242	298	241	297	LYS	LYS	CB	CB	56	13.2	15.7	DSS	http://www.mcponline.org/content/11/3/M111.014165	Leitner, A. et al. Expanding the chemical cross-linking toolbox by the use of multiple proteases and enrichment by size exclusion chromatography. Molecular & cellular proteomics (2012) vol.11 (3) M111.014126
intra	P00563	P00563	KCRM_RABIT	KCRM_RABIT	1u6r	PDB	A	A	107	116	106	115	LYS	LYS	CB	CB	9	17.1	19.4	DSS	http://www.mcponline.org/content/11/3/M111.014166	Leitner, A. et al. Expanding the chemical cross-linking toolbox by the use of multiple proteases and enrichment by size exclusion chromatography. Molecular & cellular proteomics (2012) vol.11 (3) M111.014126
intra	P00563	P00563	KCRM_RABIT	KCRM_RABIT	1u6r	PDB	B	B	101	107	100	106	LYS	LYS	CB	CB	6	13.3	16.9	DSS	http://www.mcponline.org/content/11/3/M111.014167	Leitner, A. et al. Expanding the chemical cross-linking toolbox by the use of multiple proteases and enrichment by size exclusion chromatography. Molecular & cellular proteomics (2012) vol.11 (3) M111.014126
intra	P00563	P00563	KCRM_RABIT	KCRM_RABIT	1u6r	PDB	B	B	298	369	297	368	LYS	LYS	CB	CB	71	15.7	17.5	DSS	http://www.mcponline.org/content/11/3/M111.014168	Leitner, A. et al. Expanding the chemical cross-linking toolbox by the use of multiple proteases and enrichment by size exclusion chromatography. Molecular & cellular proteomics (2012) vol.11 (3) M111.014126
intra	P00563	P00563	KCRM_RABIT	KCRM_RABIT	1u6r	PDB	B	B	32	101	31	100	LYS	LYS	CB	CB	69	16.6	19.3	DSS	http://www.mcponline.org/content/11/3/M111.014169	Leitner, A. et al. Expanding the chemical cross-linking toolbox by the use of multiple proteases and enrichment by size exclusion chromatography. Molecular & cellular proteomics (2012) vol.11 (3) M111.014126
intra	P00563	P00563	KCRM_RABIT	KCRM_RABIT	1u6r	PDB	A	A	107	265	106	264	LYS	LYS	CB	CB	158	19.8	23.5	DSS	http://www.mcponline.org/content/11/3/M111.014170	Leitner, A. et al. Expanding the chemical cross-linking toolbox by the use of multiple proteases and enrichment by size exclusion chromatography. Molecular & cellular proteomics (2012) vol.11 (3) M111.014126
intra	P00563	P00563	KCRM_RABIT	KCRM_RABIT	1u6r	PDB	B	B	298	366	297	365	LYS	LYS	CB	CB	68	14.9	22.5	DSS	http://www.mcponline.org/content/11/3/M111.014171	Leitner, A. et al. Expanding the chemical cross-linking toolbox by the use of multiple proteases and enrichment by size exclusion chromatography. Molecular & cellular proteomics (2012) vol.11 (3) M111.014126
intra	P00563	P00563	KCRM_RABIT	KCRM_RABIT	1u6r	PDB	A	A	105	116	104	115	LYS	LYS	CB	CB	11	23.6	27.2	DSS	http://www.mcponline.org/content/11/3/M111.014172	Leitner, A. et al. Expanding the chemical cross-linking toolbox by the use of multiple proteases and enrichment by size exclusion chromatography. Molecular & cellular proteomics (2012) vol.11 (3) M111.014126
intra	P00563	P00563	KCRM_RABIT	KCRM_RABIT	1u6r	PDB	A	A	105	265	104	264	LYS	LYS	CB	CB	160	21.5	25.2	DSS	http://www.mcponline.org/content/11/3/M111.014173	Leitner, A. et al. Expanding the chemical cross-linking toolbox by the use of multiple proteases and enrichment by size exclusion chromatography. Molecular & cellular proteomics (2012) vol.11 (3) M111.014126
inter	P00563	P00563	KCRM_RABIT	KCRM_RABIT	1u6r	PDB	A	B	25	196	24	195	LYS	LYS	CB	CB	551	15.7	16.3	DSS	http://www.mcponline.org/content/11/3/M111.014174	Leitner, A. et al. Expanding the chemical cross-linking toolbox by the use of multiple proteases and enrichment by size exclusion chromatography. Molecular & cellular proteomics (2012) vol.11 (3) M111.014126
intra	P00563	P00563	KCRM_RABIT	KCRM_RABIT	1u6r	PDB	B	B	105	298	104	297	LYS	LYS	CB	CB	193	38.2	57	DSS	http://www.mcponline.org/content/11/3/M111.014175	Leitner, A. et al. Expanding the chemical cross-linking toolbox by the use of multiple proteases and enrichment by size exclusion chromatography. Molecular & cellular proteomics (2012) vol.11 (3) M111.014126
intra	P02789	P02789	TRFE_CHICK	TRFE_CHICK	2d3i	PDB	A	A	573	578	554	559	LYS	LYS	CB	CB	5	5.2	5.4	DSS	http://www.mcponline.org/content/11/3/M111.014176	Leitner, A. et al. Expanding the chemical cross-linking toolbox by the use of multiple proteases and enrichment by size exclusion chromatography. Molecular & cellular proteomics (2012) vol.11 (3) M111.014126
intra	P02789	P02789	TRFE_CHICK	TRFE_CHICK	2d3i	PDB	A	A	194	200	175	181	LYS	LYS	CB	CB	6	6.1	6.6	DSS	http://www.mcponline.org/content/11/3/M111.014177	Leitner, A. et al. Expanding the chemical cross-linking toolbox by the use of multiple proteases and enrichment by size exclusion chromatography. Molecular & cellular proteomics (2012) vol.11 (3) M111.014126
intra	P02789	P02789	TRFE_CHICK	TRFE_CHICK	2d3i	PDB	A	A	194	221	175	202	LYS	LYS	CB	CB	27	6.8	7	DSS	http://www.mcponline.org/content/11/3/M111.014178	Leitner, A. et al. Expanding the chemical cross-linking toolbox by the use of multiple proteases and enrichment by size exclusion chromatography. Molecular & cellular proteomics (2012) vol.11 (3) M111.014126
intra	P02789	P02789	TRFE_CHICK	TRFE_CHICK	2d3i	PDB	A	A	58	66	39	47	LYS	LYS	CB	CB	8	8.4	13.7	DSS	http://www.mcponline.org/content/11/3/M111.014179	Leitner, A. et al. Expanding the chemical cross-linking toolbox by the use of multiple proteases and enrichment by size exclusion chromatography. Molecular & cellular proteomics (2012) vol.11 (3) M111.014126
intra	P02789	P02789	TRFE_CHICK	TRFE_CHICK	2d3i	PDB	A	A	200	221	181	202	LYS	LYS	CB	CB	21	10.9	16.4	DSS	http://www.mcponline.org/content/11/3/M111.014180	Leitner, A. et al. Expanding the chemical cross-linking toolbox by the use of multiple proteases and enrichment by size exclusion chromatography. Molecular & cellular proteomics (2012) vol.11 (3) M111.014126
intra	P02789	P02789	TRFE_CHICK	TRFE_CHICK	2d3i	PDB	A	A	632	665	613	646	LYS	LYS	CB	CB	33	13.3	15.3	DSS	http://www.mcponline.org/content/11/3/M111.014181	Leitner, A. et al. Expanding the chemical cross-linking toolbox by the use of multiple proteases and enrichment by size exclusion chromatography. Molecular & cellular proteomics (2012) vol.11 (3) M111.014126
intra	P02789	P02789	TRFE_CHICK	TRFE_CHICK	2d3i	PDB	A	A	371	652	352	633	LYS	LYS	CB	CB	275	11.3	14.6	DSS	http://www.mcponline.org/content/11/3/M111.014182	Leitner, A. et al. Expanding the chemical cross-linking toolbox by the use of multiple proteases and enrichment by size exclusion chromatography. Molecular & cellular proteomics (2012) vol.11 (3) M111.014126
intra	P02789	P02789	TRFE_CHICK	TRFE_CHICK	2d3i	PDB	A	A	37	310	18	291	LYS	LYS	CB	CB	273	14.2	15.7	DSS	http://www.mcponline.org/content/11/3/M111.014183	Leitner, A. et al. Expanding the chemical cross-linking toolbox by the use of multiple proteases and enrichment by size exclusion chromatography. Molecular & cellular proteomics (2012) vol.11 (3) M111.014126
intra	P02789	P02789	TRFE_CHICK	TRFE_CHICK	2d3i	PDB	A	A	539	553	520	534	LYS	LYS	CB	CB	14	10.5	11.7	DSS	http://www.mcponline.org/content/11/3/M111.014184	Leitner, A. et al. Expanding the chemical cross-linking toolbox by the use of multiple proteases and enrichment by size exclusion chromatography. Molecular & cellular proteomics (2012) vol.11 (3) M111.014126
intra	P02789	P02789	TRFE_CHICK	TRFE_CHICK	2d3i	PDB	A	A	92	405	73	386	LYS	LYS	CB	CB	307	15.2	16	DSS	http://www.mcponline.org/content/11/3/M111.014185	Leitner, A. et al. Expanding the chemical cross-linking toolbox by the use of multiple proteases and enrichment by size exclusion chromatography. Molecular & cellular proteomics (2012) vol.11 (3) M111.014126
intra	P02789	P02789	TRFE_CHICK	TRFE_CHICK	2d3i	PDB	A	A	573	652	554	633	LYS	LYS	CB	CB	79	13	17.2	DSS	http://www.mcponline.org/content/11/3/M111.014186	Leitner, A. et al. Expanding the chemical cross-linking toolbox by the use of multiple proteases and enrichment by size exclusion chromatography. Molecular & cellular proteomics (2012) vol.11 (3) M111.014126
intra	P02789	P02789	TRFE_CHICK	TRFE_CHICK	2d3i	PDB	A	A	309	315	290	296	LYS	LYS	CB	CB	6	9.8	21.1	DSS	http://www.mcponline.org/content/11/3/M111.014187	Leitner, A. et al. Expanding the chemical cross-linking toolbox by the use of multiple proteases and enrichment by size exclusion chromatography. Molecular & cellular proteomics (2012) vol.11 (3) M111.014126
intra	P02789	P02789	TRFE_CHICK	TRFE_CHICK	2d3i	PDB	A	A	641	661	622	642	LYS	LYS	CB	CB	20	12.7	17.8	DSS	http://www.mcponline.org/content/11/3/M111.014188	Leitner, A. et al. Expanding the chemical cross-linking toolbox by the use of multiple proteases and enrichment by size exclusion chromatography. Molecular & cellular proteomics (2012) vol.11 (3) M111.014126
intra	P02789	P02789	TRFE_CHICK	TRFE_CHICK	2d3i	PDB	A	A	92	402	73	383	LYS	LYS	CB	CB	304	18	19.6	DSS	http://www.mcponline.org/content/11/3/M111.014189	Leitner, A. et al. Expanding the chemical cross-linking toolbox by the use of multiple proteases and enrichment by size exclusion chromatography. Molecular & cellular proteomics (2012) vol.11 (3) M111.014126
intra	P02789	P02789	TRFE_CHICK	TRFE_CHICK	2d3i	PDB	A	A	673	688	654	669	LYS	LYS	CB	CB	15	13.3	14.4	DSS	http://www.mcponline.org/content/11/3/M111.014190	Leitner, A. et al. Expanding the chemical cross-linking toolbox by the use of multiple proteases and enrichment by size exclusion chromatography. Molecular & cellular proteomics (2012) vol.11 (3) M111.014126
intra	P02789	P02789	TRFE_CHICK	TRFE_CHICK	2d3i	PDB	A	A	327	688	308	669	LYS	LYS	CB	CB	349	19.3	20.6	DSS	http://www.mcponline.org/content/11/3/M111.014191	Leitner, A. et al. Expanding the chemical cross-linking toolbox by the use of multiple proteases and enrichment by size exclusion chromatography. Molecular & cellular proteomics (2012) vol.11 (3) M111.014126
intra	P02789	P02789	TRFE_CHICK	TRFE_CHICK	2d3i	PDB	A	A	66	92	47	73	LYS	LYS	CB	CB	26	12.2	19.9	DSS	http://www.mcponline.org/content/11/3/M111.014192	Leitner, A. et al. Expanding the chemical cross-linking toolbox by the use of multiple proteases and enrichment by size exclusion chromatography. Molecular & cellular proteomics (2012) vol.11 (3) M111.014126
intra	P02789	P02789	TRFE_CHICK	TRFE_CHICK	2d3i	PDB	A	A	37	309	18	290	LYS	LYS	CB	CB	272	19.6	21	DSS	http://www.mcponline.org/content/11/3/M111.014193	Leitner, A. et al. Expanding the chemical cross-linking toolbox by the use of multiple proteases and enrichment by size exclusion chromatography. Molecular & cellular proteomics (2012) vol.11 (3) M111.014126
intra	P02789	P02789	TRFE_CHICK	TRFE_CHICK	2d3i	PDB	A	A	352	619	333	600	LYS	LYS	CB	CB	255	19.4	21.1	DSS	http://www.mcponline.org/content/11/3/M111.014194	Leitner, A. et al. Expanding the chemical cross-linking toolbox by the use of multiple proteases and enrichment by size exclusion chromatography. Molecular & cellular proteomics (2012) vol.11 (3) M111.014126
intra	P02789	P02789	TRFE_CHICK	TRFE_CHICK	2d3i	PDB	A	A	471	539	452	520	LYS	LYS	CB	CB	68	15.5	18.2	DSS	http://www.mcponline.org/content/11/3/M111.014195	Leitner, A. et al. Expanding the chemical cross-linking toolbox by the use of multiple proteases and enrichment by size exclusion chromatography. Molecular & cellular proteomics (2012) vol.11 (3) M111.014126
intra	P02789	P02789	TRFE_CHICK	TRFE_CHICK	2d3i	PDB	A	A	198	221	179	202	LYS	LYS	CB	CB	23	18.3	27.6	DSS	http://www.mcponline.org/content/11/3/M111.014196	Leitner, A. et al. Expanding the chemical cross-linking toolbox by the use of multiple proteases and enrichment by size exclusion chromatography. Molecular & cellular proteomics (2012) vol.11 (3) M111.014126
intra	P02789	P02789	TRFE_CHICK	TRFE_CHICK	2d3i	PDB	A	A	665	679	646	660	LYS	LYS	CB	CB	14	22.5	27.5	DSS	http://www.mcponline.org/content/11/3/M111.014197	Leitner, A. et al. Expanding the chemical cross-linking toolbox by the use of multiple proteases and enrichment by size exclusion chromatography. Molecular & cellular proteomics (2012) vol.11 (3) M111.014126
intra	P02789	P02789	TRFE_CHICK	TRFE_CHICK	2d3i	PDB	A	A	376	661	357	642	LYS	LYS	CB	CB	279	17.9	26.9	DSS	http://www.mcponline.org/content/11/3/M111.014198	Leitner, A. et al. Expanding the chemical cross-linking toolbox by the use of multiple proteases and enrichment by size exclusion chromatography. Molecular & cellular proteomics (2012) vol.11 (3) M111.014126
intra	P02789	P02789	TRFE_CHICK	TRFE_CHICK	2d3i	PDB	A	A	665	673	646	654	LYS	LYS	CB	CB	8	18.5	29.3	DSS	http://www.mcponline.org/content/11/3/M111.014199	Leitner, A. et al. Expanding the chemical cross-linking toolbox by the use of multiple proteases and enrichment by size exclusion chromatography. Molecular & cellular proteomics (2012) vol.11 (3) M111.014126
intra	P02789	P02789	TRFE_CHICK	TRFE_CHICK	2d3i	PDB	A	A	259	327	240	308	LYS	LYS	CB	CB	68	20.9	29	DSS	http://www.mcponline.org/content/11/3/M111.014200	Leitner, A. et al. Expanding the chemical cross-linking toolbox by the use of multiple proteases and enrichment by size exclusion chromatography. Molecular & cellular proteomics (2012) vol.11 (3) M111.014126
intra	P02789	P02789	TRFE_CHICK	TRFE_CHICK	2d3i	PDB	A	A	468	679	449	660	LYS	LYS	CB	CB	211	25.3	28.6	DSS	http://www.mcponline.org/content/11/3/M111.014201	Leitner, A. et al. Expanding the chemical cross-linking toolbox by the use of multiple proteases and enrichment by size exclusion chromatography. Molecular & cellular proteomics (2012) vol.11 (3) M111.014126
intra	P02789	P02789	TRFE_CHICK	TRFE_CHICK	2d3i	PDB	A	A	259	352	240	333	LYS	LYS	CB	CB	93	32.3	37.7	DSS	http://www.mcponline.org/content/11/3/M111.014202	Leitner, A. et al. Expanding the chemical cross-linking toolbox by the use of multiple proteases and enrichment by size exclusion chromatography. Molecular & cellular proteomics (2012) vol.11 (3) M111.014126
intra	P02789	P02789	TRFE_CHICK	TRFE_CHICK	2d3i	PDB	A	A	66	619	47	600	LYS	LYS	CB	CB	541	36.7	41.4	DSS	http://www.mcponline.org/content/11/3/M111.014203	Leitner, A. et al. Expanding the chemical cross-linking toolbox by the use of multiple proteases and enrichment by size exclusion chromatography. Molecular & cellular proteomics (2012) vol.11 (3) M111.014126
intra	P02789	P02789	TRFE_CHICK	TRFE_CHICK	2d3i	PDB	A	A	194	352	175	333	LYS	LYS	CB	CB	158	34.2	51.5	DSS	http://www.mcponline.org/content/11/3/M111.014204	Leitner, A. et al. Expanding the chemical cross-linking toolbox by the use of multiple proteases and enrichment by size exclusion chromatography. Molecular & cellular proteomics (2012) vol.11 (3) M111.014126
intra	P02789	P02789	TRFE_CHICK	TRFE_CHICK	2d3i	PDB	A	A	376	665	357	646	LYS	LYS	CB	CB	283	23.1	49	DSS	http://www.mcponline.org/content/11/3/M111.014205	Leitner, A. et al. Expanding the chemical cross-linking toolbox by the use of multiple proteases and enrichment by size exclusion chromatography. Molecular & cellular proteomics (2012) vol.11 (3) M111.014126
intra	P02789	P02789	TRFE_CHICK	TRFE_CHICK	2d3i	PDB	A	A	327	352	308	333	LYS	LYS	CB	CB	25	32.1	55	DSS	http://www.mcponline.org/content/11/3/M111.014206	Leitner, A. et al. Expanding the chemical cross-linking toolbox by the use of multiple proteases and enrichment by size exclusion chromatography. Molecular & cellular proteomics (2012) vol.11 (3) M111.014126
intra	P02789	P02789	TRFE_CHICK	TRFE_CHICK	2d3i	PDB	A	A	37	352	18	333	LYS	LYS	CB	CB	315	40.4	56.2	DSS	http://www.mcponline.org/content/11/3/M111.014207	Leitner, A. et al. Expanding the chemical cross-linking toolbox by the use of multiple proteases and enrichment by size exclusion chromatography. Molecular & cellular proteomics (2012) vol.11 (3) M111.014126
intra	P02789	P02789	TRFE_CHICK	TRFE_CHICK	2d3i	PDB	A	A	661	688	642	669	LYS	LYS	CB	CB	27	30.7	61	DSS	http://www.mcponline.org/content/11/3/M111.014208	Leitner, A. et al. Expanding the chemical cross-linking toolbox by the use of multiple proteases and enrichment by size exclusion chromatography. Molecular & cellular proteomics (2012) vol.11 (3) M111.014126
intra	P02789	P02789	TRFE_CHICK	TRFE_CHICK	2d3i	PDB	A	A	352	471	333	452	LYS	LYS	CB	CB	107	54.4	68.8	DSS	http://www.mcponline.org/content/11/3/M111.014209	Leitner, A. et al. Expanding the chemical cross-linking toolbox by the use of multiple proteases and enrichment by size exclusion chromatography. Molecular & cellular proteomics (2012) vol.11 (3) M111.014126
intra	P11974	P11974	KPYM_RABIT	KPYM_RABIT	2g50	PISA	A	A	498	505	497	504	LYS	LYS	CB	CB	7	7.6	8.1	DSS	http://www.mcponline.org/content/11/3/M111.014210	Leitner, A. et al. Expanding the chemical cross-linking toolbox by the use of multiple proteases and enrichment by size exclusion chromatography. Molecular & cellular proteomics (2012) vol.11 (3) M111.014126
intra	P11974	P11974	KPYM_RABIT	KPYM_RABIT	2g50	PISA	A	A	230	261	229	260	LYS	LYS	CB	CB	31	9	11.4	DSS	http://www.mcponline.org/content/11/3/M111.014211	Leitner, A. et al. Expanding the chemical cross-linking toolbox by the use of multiple proteases and enrichment by size exclusion chromatography. Molecular & cellular proteomics (2012) vol.11 (3) M111.014126
intra	P11974	P11974	KPYM_RABIT	KPYM_RABIT	2g50	PISA	A	A	336	367	335	366	LYS	LYS	CB	CB	31	10.4	13.3	DSS	http://www.mcponline.org/content/11/3/M111.014212	Leitner, A. et al. Expanding the chemical cross-linking toolbox by the use of multiple proteases and enrichment by size exclusion chromatography. Molecular & cellular proteomics (2012) vol.11 (3) M111.014126
intra	P11974	P11974	KPYM_RABIT	KPYM_RABIT	2g50	PISA	A	A	256	263	255	262	LYS	LYS	CB	CB	7	10.6	13.1	DSS	http://www.mcponline.org/content/11/3/M111.014213	Leitner, A. et al. Expanding the chemical cross-linking toolbox by the use of multiple proteases and enrichment by size exclusion chromatography. Molecular & cellular proteomics (2012) vol.11 (3) M111.014126
intra	P11974	P11974	KPYM_RABIT	KPYM_RABIT	2g50	PISA	A	A	230	256	229	255	LYS	LYS	CB	CB	26	11.7	15.7	DSS	http://www.mcponline.org/content/11/3/M111.014214	Leitner, A. et al. Expanding the chemical cross-linking toolbox by the use of multiple proteases and enrichment by size exclusion chromatography. Molecular & cellular proteomics (2012) vol.11 (3) M111.014126
intra	P11974	P11974	KPYM_RABIT	KPYM_RABIT	2g50	PISA	A	A	206	367	205	366	LYS	LYS	CB	CB	161	14.5	16.8	DSS	http://www.mcponline.org/content/11/3/M111.014215	Leitner, A. et al. Expanding the chemical cross-linking toolbox by the use of multiple proteases and enrichment by size exclusion chromatography. Molecular & cellular proteomics (2012) vol.11 (3) M111.014126
intra	P11974	P11974	KPYM_RABIT	KPYM_RABIT	2g50	PISA	A	A	247	256	246	255	LYS	LYS	CB	CB	9	14.4	20.1	DSS	http://www.mcponline.org/content/11/3/M111.014216	Leitner, A. et al. Expanding the chemical cross-linking toolbox by the use of multiple proteases and enrichment by size exclusion chromatography. Molecular & cellular proteomics (2012) vol.11 (3) M111.014126
intra	P11974	P11974	KPYM_RABIT	KPYM_RABIT	2g50	PISA	A	A	62	89	61	88	LYS	LYS	CB	CB	27	13.9	21	DSS	http://www.mcponline.org/content/11/3/M111.014217	Leitner, A. et al. Expanding the chemical cross-linking toolbox by the use of multiple proteases and enrichment by size exclusion chromatography. Molecular & cellular proteomics (2012) vol.11 (3) M111.014126
intra	P11974	P11974	KPYM_RABIT	KPYM_RABIT	2g50	PISA	A	A	166	247	165	246	LYS	LYS	CB	CB	79	19.9	21.4	DSS	http://www.mcponline.org/content/11/3/M111.014218	Leitner, A. et al. Expanding the chemical cross-linking toolbox by the use of multiple proteases and enrichment by size exclusion chromatography. Molecular & cellular proteomics (2012) vol.11 (3) M111.014126
intra	P11974	P11974	KPYM_RABIT	KPYM_RABIT	2g50	PISA	A	A	89	261	88	260	LYS	LYS	CB	CB	167	20.2	22.5	DSS	http://www.mcponline.org/content/11/3/M111.014219	Leitner, A. et al. Expanding the chemical cross-linking toolbox by the use of multiple proteases and enrichment by size exclusion chromatography. Molecular & cellular proteomics (2012) vol.11 (3) M111.014126
intra	P11974	P11974	KPYM_RABIT	KPYM_RABIT	2g50	PISA	A	A	115	367	114	366	LYS	LYS	CB	CB	252	17.7	23.5	DSS	http://www.mcponline.org/content/11/3/M111.014220	Leitner, A. et al. Expanding the chemical cross-linking toolbox by the use of multiple proteases and enrichment by size exclusion chromatography. Molecular & cellular proteomics (2012) vol.11 (3) M111.014126
inter	P11974	P11974	KPYM_RABIT	KPYM_RABIT	2g50	PISA	A	M	135	337	134	336	LYS	LYS	CB	CB	719	16.2	18.5	DSS	http://www.mcponline.org/content/11/3/M111.014221	Leitner, A. et al. Expanding the chemical cross-linking toolbox by the use of multiple proteases and enrichment by size exclusion chromatography. Molecular & cellular proteomics (2012) vol.11 (3) M111.014126
intra	P11974	P11974	KPYM_RABIT	KPYM_RABIT	2g50	PISA	A	A	230	266	229	265	LYS	LYS	CB	CB	36	16.8	34.8	DSS	http://www.mcponline.org/content/11/3/M111.014222	Leitner, A. et al. Expanding the chemical cross-linking toolbox by the use of multiple proteases and enrichment by size exclusion chromatography. Molecular & cellular proteomics (2012) vol.11 (3) M111.014126
intra	P11974	P11974	KPYM_RABIT	KPYM_RABIT	2g50	PISA	O	O	162	173	161	172	LYS	LYS	CB	CB	11	19.9	38.8	DSS	http://www.mcponline.org/content/11/3/M111.014223	Leitner, A. et al. Expanding the chemical cross-linking toolbox by the use of multiple proteases and enrichment by size exclusion chromatography. Molecular & cellular proteomics (2012) vol.11 (3) M111.014126
intra	P11974	P11974	KPYM_RABIT	KPYM_RABIT	2g50	PISA	A	A	337	367	336	366	LYS	LYS	CB	CB	30	14.1	21.5	DSS	http://www.mcponline.org/content/11/3/M111.014225	Leitner, A. et al. Expanding the chemical cross-linking toolbox by the use of multiple proteases and enrichment by size exclusion chromatography. Molecular & cellular proteomics (2012) vol.11 (3) M111.014126
intra	P00883	P00883	ALDOA_RABIT	ALDOA_RABIT	3dfq	PDB	C	C	42	312	41	311	LYS	LYS	CB	CB	270	13.3	16.7	DSS	http://www.mcponline.org/content/11/3/M111.014226	Leitner, A. et al. Expanding the chemical cross-linking toolbox by the use of multiple proteases and enrichment by size exclusion chromatography. Molecular & cellular proteomics (2012) vol.11 (3) M111.014126
intra	P00883	P00883	ALDOA_RABIT	ALDOA_RABIT	3dfq	PDB	C	C	28	99	27	98	LYS	LYS	CB	CB	71	13.9	18.5	DSS	http://www.mcponline.org/content/11/3/M111.014227	Leitner, A. et al. Expanding the chemical cross-linking toolbox by the use of multiple proteases and enrichment by size exclusion chromatography. Molecular & cellular proteomics (2012) vol.11 (3) M111.014126
intra	P00883	P00883	ALDOA_RABIT	ALDOA_RABIT	3dfq	PDB	D	D	99	140	98	139	LYS	LYS	CB	CB	41	14	19.5	DSS	http://www.mcponline.org/content/11/3/M111.014228	Leitner, A. et al. Expanding the chemical cross-linking toolbox by the use of multiple proteases and enrichment by size exclusion chromatography. Molecular & cellular proteomics (2012) vol.11 (3) M111.014126
intra	P00883	P00883	ALDOA_RABIT	ALDOA_RABIT	3dfq	PDB	A	A	101	322	100	321	LYS	LYS	CB	CB	221	17.1	20.1	DSS	http://www.mcponline.org/content/11/3/M111.014229	Leitner, A. et al. Expanding the chemical cross-linking toolbox by the use of multiple proteases and enrichment by size exclusion chromatography. Molecular & cellular proteomics (2012) vol.11 (3) M111.014126
intra	P00883	P00883	ALDOA_RABIT	ALDOA_RABIT	3dfq	PDB	A	A	87	99	86	98	LYS	LYS	CB	CB	12	13.7	21.7	DSS	http://www.mcponline.org/content/11/3/M111.014230	Leitner, A. et al. Expanding the chemical cross-linking toolbox by the use of multiple proteases and enrichment by size exclusion chromatography. Molecular & cellular proteomics (2012) vol.11 (3) M111.014126
intra	P00883	P00883	ALDOA_RABIT	ALDOA_RABIT	3dfq	PDB	C	C	28	101	27	100	LYS	LYS	CB	CB	73	11.3	24.2	DSS	http://www.mcponline.org/content/11/3/M111.014231	Leitner, A. et al. Expanding the chemical cross-linking toolbox by the use of multiple proteases and enrichment by size exclusion chromatography. Molecular & cellular proteomics (2012) vol.11 (3) M111.014126
intra	P00883	P00883	ALDOA_RABIT	ALDOA_RABIT	3dfq	PDB	C	C	87	139	86	138	LYS	LYS	CB	CB	52	19.4	28.2	DSS	http://www.mcponline.org/content/11/3/M111.014232	Leitner, A. et al. Expanding the chemical cross-linking toolbox by the use of multiple proteases and enrichment by size exclusion chromatography. Molecular & cellular proteomics (2012) vol.11 (3) M111.014126
intra	P00883	P00883	ALDOA_RABIT	ALDOA_RABIT	3dfq	PDB	C	C	13	139	12	138	LYS	LYS	CB	CB	126	15.9	35.6	DSS	http://www.mcponline.org/content/11/3/M111.014233	Leitner, A. et al. Expanding the chemical cross-linking toolbox by the use of multiple proteases and enrichment by size exclusion chromatography. Molecular & cellular proteomics (2012) vol.11 (3) M111.014126
intra	P00883	P00883	ALDOA_RABIT	ALDOA_RABIT	3dfq	PDB	A	A	13	140	12	139	LYS	LYS	CB	CB	127	20.3	34.2	DSS	http://www.mcponline.org/content/11/3/M111.014234	Leitner, A. et al. Expanding the chemical cross-linking toolbox by the use of multiple proteases and enrichment by size exclusion chromatography. Molecular & cellular proteomics (2012) vol.11 (3) M111.014126
intra	P00883	P00883	ALDOA_RABIT	ALDOA_RABIT	3dfq	PDB	A	A	101	330	100	329	LYS	LYS	CB	CB	229	16.9	30.8	DSS	http://www.mcponline.org/content/11/3/M111.014235	Leitner, A. et al. Expanding the chemical cross-linking toolbox by the use of multiple proteases and enrichment by size exclusion chromatography. Molecular & cellular proteomics (2012) vol.11 (3) M111.014126
intra	P00883	P00883	ALDOA_RABIT	ALDOA_RABIT	3dfq	PDB	A	A	101	317	100	316	LYS	LYS	CB	CB	216	24.1	37	DSS	http://www.mcponline.org/content/11/3/M111.014236	Leitner, A. et al. Expanding the chemical cross-linking toolbox by the use of multiple proteases and enrichment by size exclusion chromatography. Molecular & cellular proteomics (2012) vol.11 (3) M111.014126
intra	P00883	P00883	ALDOA_RABIT	ALDOA_RABIT	3dfq	PDB	A	A	140	322	139	321	LYS	LYS	CB	CB	182	34.8	44.7	DSS	http://www.mcponline.org/content/11/3/M111.014237	Leitner, A. et al. Expanding the chemical cross-linking toolbox by the use of multiple proteases and enrichment by size exclusion chromatography. Molecular & cellular proteomics (2012) vol.11 (3) M111.014126
intra	P00883	P00883	ALDOA_RABIT	ALDOA_RABIT	3dfq	PDB	C	C	140	147	139	146	LYS	LYS	CB	CB	7	18	38.1	DSS	http://www.mcponline.org/content/11/3/M111.014238	Leitner, A. et al. Expanding the chemical cross-linking toolbox by the use of multiple proteases and enrichment by size exclusion chromatography. Molecular & cellular proteomics (2012) vol.11 (3) M111.014126
inter	P00883	P00883	ALDOA_RABIT	ALDOA_RABIT	3dfq	PDB	A	B	42	140	41	139	LYS	LYS	CB	CB	448	32.3	35.6	DSS	http://www.mcponline.org/content/11/3/M111.014239	Leitner, A. et al. Expanding the chemical cross-linking toolbox by the use of multiple proteases and enrichment by size exclusion chromatography. Molecular & cellular proteomics (2012) vol.11 (3) M111.014126
intra	P00883	P00883	ALDOA_RABIT	ALDOA_RABIT	3dfq	PDB	C	C	42	101	41	100	LYS	LYS	CB	CB	59	27.7	50.2	DSS	http://www.mcponline.org/content/11/3/M111.014240	Leitner, A. et al. Expanding the chemical cross-linking toolbox by the use of multiple proteases and enrichment by size exclusion chromatography. Molecular & cellular proteomics (2012) vol.11 (3) M111.014126
intra	P00883	P00883	ALDOA_RABIT	ALDOA_RABIT	3dfq	PDB	C	C	140	330	139	329	LYS	LYS	CB	CB	190	35.3	56.2	DSS	http://www.mcponline.org/content/11/3/M111.014241	Leitner, A. et al. Expanding the chemical cross-linking toolbox by the use of multiple proteases and enrichment by size exclusion chromatography. Molecular & cellular proteomics (2012) vol.11 (3) M111.014126
inter	P00883	P00883	ALDOA_RABIT	ALDOA_RABIT	3dfq	PDB	B	C	13	200	12	199	LYS	LYS	CB	CB	537	12.9	15.2	DSS	http://www.mcponline.org/content/11/3/M111.014242	Leitner, A. et al. Expanding the chemical cross-linking toolbox by the use of multiple proteases and enrichment by size exclusion chromatography. Molecular & cellular proteomics (2012) vol.11 (3) M111.014126
intra	P00883	P00883	ALDOA_RABIT	ALDOA_RABIT	3dfq	PDB	A	A	101	147	100	146	LYS	LYS	CB	CB	46	19.3	61.3	DSS	http://www.mcponline.org/content/11/3/M111.014243	Leitner, A. et al. Expanding the chemical cross-linking toolbox by the use of multiple proteases and enrichment by size exclusion chromatography. Molecular & cellular proteomics (2012) vol.11 (3) M111.014126
inter	P00883	P00883	ALDOA_RABIT	ALDOA_RABIT	3dfq	PDB	A	D	13	208	12	207	LYS	LYS	CB	CB	1248	17.8	20.1	DSS	http://www.mcponline.org/content/11/3/M111.014244	Leitner, A. et al. Expanding the chemical cross-linking toolbox by the use of multiple proteases and enrichment by size exclusion chromatography. Molecular & cellular proteomics (2012) vol.11 (3) M111.014126
intra	P00432	P00432	CATA_BOVIN	CATA_BOVIN	4blc	PDB	B	B	476	480	475	479	LYS	LYS	CB	CB	4	5.9	5.9	DSS	http://www.mcponline.org/content/11/3/M111.014245	Leitner, A. et al. Expanding the chemical cross-linking toolbox by the use of multiple proteases and enrichment by size exclusion chromatography. Molecular & cellular proteomics (2012) vol.11 (3) M111.014126
intra	P00432	P00432	CATA_BOVIN	CATA_BOVIN	4blc	PDB	B	B	449	457	448	456	LYS	LYS	CB	CB	8	15.1	23.4	DSS	http://www.mcponline.org/content/11/3/M111.014246	Leitner, A. et al. Expanding the chemical cross-linking toolbox by the use of multiple proteases and enrichment by size exclusion chromatography. Molecular & cellular proteomics (2012) vol.11 (3) M111.014126
inter	P00432	P00432	CATA_BOVIN	CATA_BOVIN	4blc	PDB	B	D	23	98	22	97	LYS	LYS	CB	CB	1073	19	19.5	DSS	http://www.mcponline.org/content/11/3/M111.014247	Leitner, A. et al. Expanding the chemical cross-linking toolbox by the use of multiple proteases and enrichment by size exclusion chromatography. Molecular & cellular proteomics (2012) vol.11 (3) M111.014126
inter	P00432	P00432	CATA_BOVIN	CATA_BOVIN	4blc	PDB	A	D	13	477	12	476	LYS	LYS	CB	CB	1961	14.7	18.9	DSS	http://www.mcponline.org/content/11/3/M111.014248	Leitner, A. et al. Expanding the chemical cross-linking toolbox by the use of multiple proteases and enrichment by size exclusion chromatography. Molecular & cellular proteomics (2012) vol.11 (3) M111.014126
inter	P00432	P00432	CATA_BOVIN	CATA_BOVIN	4blc	PDB	B	C	16	476	15	475	LYS	LYS	CB	CB	959	16.4	21.3	DSS	http://www.mcponline.org/content/11/3/M111.014249	Leitner, A. et al. Expanding the chemical cross-linking toolbox by the use of multiple proteases and enrichment by size exclusion chromatography. Molecular & cellular proteomics (2012) vol.11 (3) M111.014126
intra	P02769	P02769	ALBU_BOVIN	ALBU_BOVIN	4f5s	PDB	A	A	544	548	520	524	LYS	LYS	CB	CB	4	6.7	8.2	DSS	http://www.mcponline.org/content/11/3/M111.014250	Leitner, A. et al. Expanding the chemical cross-linking toolbox by the use of multiple proteases and enrichment by size exclusion chromatography. Molecular & cellular proteomics (2012) vol.11 (3) M111.014126
intra	P02769	P02769	ALBU_BOVIN	ALBU_BOVIN	4f5s	PDB	B	B	285	309	261	285	LYS	LYS	CB	CB	24	8.3	9.6	DSS	http://www.mcponline.org/content/11/3/M111.014251	Leitner, A. et al. Expanding the chemical cross-linking toolbox by the use of multiple proteases and enrichment by size exclusion chromatography. Molecular & cellular proteomics (2012) vol.11 (3) M111.014126
intra	P02769	P02769	ALBU_BOVIN	ALBU_BOVIN	4f5s	PDB	A	A	183	204	159	180	LYS	LYS	CB	CB	21	9	9	DSS	http://www.mcponline.org/content/11/3/M111.014252	Leitner, A. et al. Expanding the chemical cross-linking toolbox by the use of multiple proteases and enrichment by size exclusion chromatography. Molecular & cellular proteomics (2012) vol.11 (3) M111.014126
intra	P02769	P02769	ALBU_BOVIN	ALBU_BOVIN	4f5s	PDB	A	A	235	263	211	239	LYS	LYS	CB	CB	28	9.8	13.8	DSS	http://www.mcponline.org/content/11/3/M111.014253	Leitner, A. et al. Expanding the chemical cross-linking toolbox by the use of multiple proteases and enrichment by size exclusion chromatography. Molecular & cellular proteomics (2012) vol.11 (3) M111.014126
intra	P02769	P02769	ALBU_BOVIN	ALBU_BOVIN	4f5s	PDB	B	B	285	304	261	280	LYS	LYS	CB	CB	19	12	13.1	DSS	http://www.mcponline.org/content/11/3/M111.014254	Leitner, A. et al. Expanding the chemical cross-linking toolbox by the use of multiple proteases and enrichment by size exclusion chromatography. Molecular & cellular proteomics (2012) vol.11 (3) M111.014126
intra	P02769	P02769	ALBU_BOVIN	ALBU_BOVIN	4f5s	PDB	B	B	65	100	41	76	LYS	LYS	CB	CB	35	10.4	11.7	DSS	http://www.mcponline.org/content/11/3/M111.014255	Leitner, A. et al. Expanding the chemical cross-linking toolbox by the use of multiple proteases and enrichment by size exclusion chromatography. Molecular & cellular proteomics (2012) vol.11 (3) M111.014126
intra	P02769	P02769	ALBU_BOVIN	ALBU_BOVIN	4f5s	PDB	A	A	65	156	41	132	LYS	LYS	CB	CB	91	13.3	14.3	DSS	http://www.mcponline.org/content/11/3/M111.014256	Leitner, A. et al. Expanding the chemical cross-linking toolbox by the use of multiple proteases and enrichment by size exclusion chromatography. Molecular & cellular proteomics (2012) vol.11 (3) M111.014126
intra	P02769	P02769	ALBU_BOVIN	ALBU_BOVIN	4f5s	PDB	B	B	420	568	396	544	LYS	LYS	CB	CB	148	12.8	13.6	DSS	http://www.mcponline.org/content/11/3/M111.014257	Leitner, A. et al. Expanding the chemical cross-linking toolbox by the use of multiple proteases and enrichment by size exclusion chromatography. Molecular & cellular proteomics (2012) vol.11 (3) M111.014126
intra	P02769	P02769	ALBU_BOVIN	ALBU_BOVIN	4f5s	PDB	A	A	235	266	211	242	LYS	LYS	CB	CB	31	9.3	14.4	DSS	http://www.mcponline.org/content/11/3/M111.014258	Leitner, A. et al. Expanding the chemical cross-linking toolbox by the use of multiple proteases and enrichment by size exclusion chromatography. Molecular & cellular proteomics (2012) vol.11 (3) M111.014126
intra	P02769	P02769	ALBU_BOVIN	ALBU_BOVIN	4f5s	PDB	B	B	248	297	224	273	LYS	LYS	CB	CB	49	10.2	19.4	DSS	http://www.mcponline.org/content/11/3/M111.014259	Leitner, A. et al. Expanding the chemical cross-linking toolbox by the use of multiple proteases and enrichment by size exclusion chromatography. Molecular & cellular proteomics (2012) vol.11 (3) M111.014126
intra	P02769	P02769	ALBU_BOVIN	ALBU_BOVIN	4f5s	PDB	B	B	28	36	4	12	LYS	LYS	CB	CB	8	12.4	14.5	DSS	http://www.mcponline.org/content/11/3/M111.014260	Leitner, A. et al. Expanding the chemical cross-linking toolbox by the use of multiple proteases and enrichment by size exclusion chromatography. Molecular & cellular proteomics (2012) vol.11 (3) M111.014126
intra	P02769	P02769	ALBU_BOVIN	ALBU_BOVIN	4f5s	PDB	A	A	228	489	204	465	LYS	LYS	CB	CB	261	12.9	15	DSS	http://www.mcponline.org/content/11/3/M111.014261	Leitner, A. et al. Expanding the chemical cross-linking toolbox by the use of multiple proteases and enrichment by size exclusion chromatography. Molecular & cellular proteomics (2012) vol.11 (3) M111.014126
intra	P02769	P02769	ALBU_BOVIN	ALBU_BOVIN	4f5s	PDB	B	B	248	299	224	275	LYS	LYS	CB	CB	51	14.2	18.6	DSS	http://www.mcponline.org/content/11/3/M111.014262	Leitner, A. et al. Expanding the chemical cross-linking toolbox by the use of multiple proteases and enrichment by size exclusion chromatography. Molecular & cellular proteomics (2012) vol.11 (3) M111.014126
intra	P02769	P02769	ALBU_BOVIN	ALBU_BOVIN	4f5s	PDB	A	A	412	420	388	396	LYS	LYS	CB	CB	8	12.2	15.9	DSS	http://www.mcponline.org/content/11/3/M111.014263	Leitner, A. et al. Expanding the chemical cross-linking toolbox by the use of multiple proteases and enrichment by size exclusion chromatography. Molecular & cellular proteomics (2012) vol.11 (3) M111.014126
intra	P02769	P02769	ALBU_BOVIN	ALBU_BOVIN	4f5s	PDB	A	A	28	88	4	64	LYS	LYS	CB	CB	60	11	19.1	DSS	http://www.mcponline.org/content/11/3/M111.014264	Leitner, A. et al. Expanding the chemical cross-linking toolbox by the use of multiple proteases and enrichment by size exclusion chromatography. Molecular & cellular proteomics (2012) vol.11 (3) M111.014126
intra	P02769	P02769	ALBU_BOVIN	ALBU_BOVIN	4f5s	PDB	B	B	523	528	499	504	LYS	LYS	CB	CB	5	12.4	15.8	DSS	http://www.mcponline.org/content/11/3/M111.014265	Leitner, A. et al. Expanding the chemical cross-linking toolbox by the use of multiple proteases and enrichment by size exclusion chromatography. Molecular & cellular proteomics (2012) vol.11 (3) M111.014126
intra	P02769	P02769	ALBU_BOVIN	ALBU_BOVIN	4f5s	PDB	A	A	235	374	211	350	LYS	LYS	CB	CB	139	13.6	18.1	DSS	http://www.mcponline.org/content/11/3/M111.014266	Leitner, A. et al. Expanding the chemical cross-linking toolbox by the use of multiple proteases and enrichment by size exclusion chromatography. Molecular & cellular proteomics (2012) vol.11 (3) M111.014126
intra	P02769	P02769	ALBU_BOVIN	ALBU_BOVIN	4f5s	PDB	A	A	346	374	322	350	LYS	LYS	CB	CB	28	12.8	14.7	DSS	http://www.mcponline.org/content/11/3/M111.014267	Leitner, A. et al. Expanding the chemical cross-linking toolbox by the use of multiple proteases and enrichment by size exclusion chromatography. Molecular & cellular proteomics (2012) vol.11 (3) M111.014126
intra	P02769	P02769	ALBU_BOVIN	ALBU_BOVIN	4f5s	PDB	A	A	36	285	12	261	LYS	LYS	CB	CB	249	15.5	17.3	DSS	http://www.mcponline.org/content/11/3/M111.014268	Leitner, A. et al. Expanding the chemical cross-linking toolbox by the use of multiple proteases and enrichment by size exclusion chromatography. Molecular & cellular proteomics (2012) vol.11 (3) M111.014126
intra	P02769	P02769	ALBU_BOVIN	ALBU_BOVIN	4f5s	PDB	A	A	88	100	64	76	LYS	LYS	CB	CB	12	14.7	18.1	DSS	http://www.mcponline.org/content/11/3/M111.014269	Leitner, A. et al. Expanding the chemical cross-linking toolbox by the use of multiple proteases and enrichment by size exclusion chromatography. Molecular & cellular proteomics (2012) vol.11 (3) M111.014126
intra	P02769	P02769	ALBU_BOVIN	ALBU_BOVIN	4f5s	PDB	B	B	548	568	524	544	LYS	LYS	CB	CB	20	14.5	17	DSS	http://www.mcponline.org/content/11/3/M111.014270	Leitner, A. et al. Expanding the chemical cross-linking toolbox by the use of multiple proteases and enrichment by size exclusion chromatography. Molecular & cellular proteomics (2012) vol.11 (3) M111.014126
intra	P02769	P02769	ALBU_BOVIN	ALBU_BOVIN	4f5s	PDB	A	A	455	463	431	439	LYS	LYS	CB	CB	8	13.7	19.6	DSS	http://www.mcponline.org/content/11/3/M111.014271	Leitner, A. et al. Expanding the chemical cross-linking toolbox by the use of multiple proteases and enrichment by size exclusion chromatography. Molecular & cellular proteomics (2012) vol.11 (3) M111.014126
intra	P02769	P02769	ALBU_BOVIN	ALBU_BOVIN	4f5s	PDB	A	A	437	561	413	537	LYS	LYS	CB	CB	124	13.5	20.8	DSS	http://www.mcponline.org/content/11/3/M111.014272	Leitner, A. et al. Expanding the chemical cross-linking toolbox by the use of multiple proteases and enrichment by size exclusion chromatography. Molecular & cellular proteomics (2012) vol.11 (3) M111.014126
intra	P02769	P02769	ALBU_BOVIN	ALBU_BOVIN	4f5s	PDB	B	B	297	304	273	280	LYS	LYS	CB	CB	7	13.5	20.1	DSS	http://www.mcponline.org/content/11/3/M111.014273	Leitner, A. et al. Expanding the chemical cross-linking toolbox by the use of multiple proteases and enrichment by size exclusion chromatography. Molecular & cellular proteomics (2012) vol.11 (3) M111.014126
intra	P02769	P02769	ALBU_BOVIN	ALBU_BOVIN	4f5s	PDB	B	B	138	455	114	431	LYS	LYS	CB	CB	317	16.9	18	DSS	http://www.mcponline.org/content/11/3/M111.014274	Leitner, A. et al. Expanding the chemical cross-linking toolbox by the use of multiple proteases and enrichment by size exclusion chromatography. Molecular & cellular proteomics (2012) vol.11 (3) M111.014126
intra	P02769	P02769	ALBU_BOVIN	ALBU_BOVIN	4f5s	PDB	A	A	228	498	204	474	LYS	LYS	CB	CB	270	13.8	20.7	DSS	http://www.mcponline.org/content/11/3/M111.014275	Leitner, A. et al. Expanding the chemical cross-linking toolbox by the use of multiple proteases and enrichment by size exclusion chromatography. Molecular & cellular proteomics (2012) vol.11 (3) M111.014126
intra	P02769	P02769	ALBU_BOVIN	ALBU_BOVIN	4f5s	PDB	B	B	140	455	116	431	LYS	LYS	CB	CB	315	19.5	20.3	DSS	http://www.mcponline.org/content/11/3/M111.014276	Leitner, A. et al. Expanding the chemical cross-linking toolbox by the use of multiple proteases and enrichment by size exclusion chromatography. Molecular & cellular proteomics (2012) vol.11 (3) M111.014126
intra	P02769	P02769	ALBU_BOVIN	ALBU_BOVIN	4f5s	PDB	A	A	374	498	350	474	LYS	LYS	CB	CB	124	17.2	20.7	DSS	http://www.mcponline.org/content/11/3/M111.014277	Leitner, A. et al. Expanding the chemical cross-linking toolbox by the use of multiple proteases and enrichment by size exclusion chromatography. Molecular & cellular proteomics (2012) vol.11 (3) M111.014126
intra	P02769	P02769	ALBU_BOVIN	ALBU_BOVIN	4f5s	PDB	A	A	65	75	41	51	LYS	LYS	CB	CB	10	16.2	21.1	DSS	http://www.mcponline.org/content/11/3/M111.014278	Leitner, A. et al. Expanding the chemical cross-linking toolbox by the use of multiple proteases and enrichment by size exclusion chromatography. Molecular & cellular proteomics (2012) vol.11 (3) M111.014126
intra	P02769	P02769	ALBU_BOVIN	ALBU_BOVIN	4f5s	PDB	B	B	245	463	221	439	LYS	LYS	CB	CB	218	19.6	21	DSS	http://www.mcponline.org/content/11/3/M111.014279	Leitner, A. et al. Expanding the chemical cross-linking toolbox by the use of multiple proteases and enrichment by size exclusion chromatography. Molecular & cellular proteomics (2012) vol.11 (3) M111.014126
intra	P02769	P02769	ALBU_BOVIN	ALBU_BOVIN	4f5s	PDB	A	A	75	156	51	132	LYS	LYS	CB	CB	81	20.3	20.3	DSS	http://www.mcponline.org/content/11/3/M111.014280	Leitner, A. et al. Expanding the chemical cross-linking toolbox by the use of multiple proteases and enrichment by size exclusion chromatography. Molecular & cellular proteomics (2012) vol.11 (3) M111.014126
intra	P02769	P02769	ALBU_BOVIN	ALBU_BOVIN	4f5s	PDB	A	A	228	266	204	242	LYS	LYS	CB	CB	38	13.4	23.2	DSS	http://www.mcponline.org/content/11/3/M111.014281	Leitner, A. et al. Expanding the chemical cross-linking toolbox by the use of multiple proteases and enrichment by size exclusion chromatography. Molecular & cellular proteomics (2012) vol.11 (3) M111.014126
intra	P02769	P02769	ALBU_BOVIN	ALBU_BOVIN	4f5s	PDB	B	B	228	374	204	350	LYS	LYS	CB	CB	146	15.4	22.5	DSS	http://www.mcponline.org/content/11/3/M111.014282	Leitner, A. et al. Expanding the chemical cross-linking toolbox by the use of multiple proteases and enrichment by size exclusion chromatography. Molecular & cellular proteomics (2012) vol.11 (3) M111.014126
intra	P02769	P02769	ALBU_BOVIN	ALBU_BOVIN	4f5s	PDB	B	B	401	412	377	388	LYS	LYS	CB	CB	11	18.5	21.6	DSS	http://www.mcponline.org/content/11/3/M111.014283	Leitner, A. et al. Expanding the chemical cross-linking toolbox by the use of multiple proteases and enrichment by size exclusion chromatography. Molecular & cellular proteomics (2012) vol.11 (3) M111.014126
intra	P02769	P02769	ALBU_BOVIN	ALBU_BOVIN	4f5s	PDB	A	A	28	263	4	239	LYS	LYS	CB	CB	235	21.9	26	DSS	http://www.mcponline.org/content/11/3/M111.014284	Leitner, A. et al. Expanding the chemical cross-linking toolbox by the use of multiple proteases and enrichment by size exclusion chromatography. Molecular & cellular proteomics (2012) vol.11 (3) M111.014126
intra	P02769	P02769	ALBU_BOVIN	ALBU_BOVIN	4f5s	PDB	A	A	204	455	180	431	LYS	LYS	CB	CB	251	19.7	25.7	DSS	http://www.mcponline.org/content/11/3/M111.014285	Leitner, A. et al. Expanding the chemical cross-linking toolbox by the use of multiple proteases and enrichment by size exclusion chromatography. Molecular & cellular proteomics (2012) vol.11 (3) M111.014126
intra	P02769	P02769	ALBU_BOVIN	ALBU_BOVIN	4f5s	PDB	B	B	204	463	180	439	LYS	LYS	CB	CB	259	23.7	26.8	DSS	http://www.mcponline.org/content/11/3/M111.014286	Leitner, A. et al. Expanding the chemical cross-linking toolbox by the use of multiple proteases and enrichment by size exclusion chromatography. Molecular & cellular proteomics (2012) vol.11 (3) M111.014126
intra	P02769	P02769	ALBU_BOVIN	ALBU_BOVIN	4f5s	PDB	A	A	100	117	76	93	LYS	LYS	CB	CB	17	15.3	26.9	DSS	http://www.mcponline.org/content/11/3/M111.014287	Leitner, A. et al. Expanding the chemical cross-linking toolbox by the use of multiple proteases and enrichment by size exclusion chromatography. Molecular & cellular proteomics (2012) vol.11 (3) M111.014126
intra	P02769	P02769	ALBU_BOVIN	ALBU_BOVIN	4f5s	PDB	A	A	117	489	93	465	LYS	LYS	CB	CB	372	21.6	26.2	DSS	http://www.mcponline.org/content/11/3/M111.014288	Leitner, A. et al. Expanding the chemical cross-linking toolbox by the use of multiple proteases and enrichment by size exclusion chromatography. Molecular & cellular proteomics (2012) vol.11 (3) M111.014126
intra	P02769	P02769	ALBU_BOVIN	ALBU_BOVIN	4f5s	PDB	A	A	36	304	12	280	LYS	LYS	CB	CB	268	22.3	32	DSS	http://www.mcponline.org/content/11/3/M111.014289	Leitner, A. et al. Expanding the chemical cross-linking toolbox by the use of multiple proteases and enrichment by size exclusion chromatography. Molecular & cellular proteomics (2012) vol.11 (3) M111.014126
intra	P02769	P02769	ALBU_BOVIN	ALBU_BOVIN	4f5s	PDB	B	B	75	88	51	64	LYS	LYS	CB	CB	13	15.6	27.6	DSS	http://www.mcponline.org/content/11/3/M111.014290	Leitner, A. et al. Expanding the chemical cross-linking toolbox by the use of multiple proteases and enrichment by size exclusion chromatography. Molecular & cellular proteomics (2012) vol.11 (3) M111.014126
intra	P02769	P02769	ALBU_BOVIN	ALBU_BOVIN	4f5s	PDB	A	A	266	489	242	465	LYS	LYS	CB	CB	223	22.1	25.8	DSS	http://www.mcponline.org/content/11/3/M111.014291	Leitner, A. et al. Expanding the chemical cross-linking toolbox by the use of multiple proteases and enrichment by size exclusion chromatography. Molecular & cellular proteomics (2012) vol.11 (3) M111.014126
intra	P02769	P02769	ALBU_BOVIN	ALBU_BOVIN	4f5s	PDB	A	A	495	561	471	537	LYS	LYS	CB	CB	66	17.8	26.9	DSS	http://www.mcponline.org/content/11/3/M111.014292	Leitner, A. et al. Expanding the chemical cross-linking toolbox by the use of multiple proteases and enrichment by size exclusion chromatography. Molecular & cellular proteomics (2012) vol.11 (3) M111.014126
intra	P02769	P02769	ALBU_BOVIN	ALBU_BOVIN	4f5s	PDB	A	A	28	266	4	242	LYS	LYS	CB	CB	238	23.9	28.8	DSS	http://www.mcponline.org/content/11/3/M111.014293	Leitner, A. et al. Expanding the chemical cross-linking toolbox by the use of multiple proteases and enrichment by size exclusion chromatography. Molecular & cellular proteomics (2012) vol.11 (3) M111.014126
intra	P02769	P02769	ALBU_BOVIN	ALBU_BOVIN	4f5s	PDB	B	B	28	285	4	261	LYS	LYS	CB	CB	257	24	27.5	DSS	http://www.mcponline.org/content/11/3/M111.014294	Leitner, A. et al. Expanding the chemical cross-linking toolbox by the use of multiple proteases and enrichment by size exclusion chromatography. Molecular & cellular proteomics (2012) vol.11 (3) M111.014126
intra	P02769	P02769	ALBU_BOVIN	ALBU_BOVIN	4f5s	PDB	A	A	318	455	294	431	LYS	LYS	CB	CB	137	25	27.8	DSS	http://www.mcponline.org/content/11/3/M111.014295	Leitner, A. et al. Expanding the chemical cross-linking toolbox by the use of multiple proteases and enrichment by size exclusion chromatography. Molecular & cellular proteomics (2012) vol.11 (3) M111.014126
intra	P02769	P02769	ALBU_BOVIN	ALBU_BOVIN	4f5s	PDB	B	B	248	304	224	280	LYS	LYS	CB	CB	56	21.8	35.9	DSS	http://www.mcponline.org/content/11/3/M111.014296	Leitner, A. et al. Expanding the chemical cross-linking toolbox by the use of multiple proteases and enrichment by size exclusion chromatography. Molecular & cellular proteomics (2012) vol.11 (3) M111.014126
intra	P02769	P02769	ALBU_BOVIN	ALBU_BOVIN	4f5s	PDB	A	A	489	495	465	471	LYS	LYS	CB	CB	6	16.5	33.7	DSS	http://www.mcponline.org/content/11/3/M111.014297	Leitner, A. et al. Expanding the chemical cross-linking toolbox by the use of multiple proteases and enrichment by size exclusion chromatography. Molecular & cellular proteomics (2012) vol.11 (3) M111.014126
intra	P02769	P02769	ALBU_BOVIN	ALBU_BOVIN	4f5s	PDB	B	B	28	309	4	285	LYS	LYS	CB	CB	281	29.8	35.2	DSS	http://www.mcponline.org/content/11/3/M111.014298	Leitner, A. et al. Expanding the chemical cross-linking toolbox by the use of multiple proteases and enrichment by size exclusion chromatography. Molecular & cellular proteomics (2012) vol.11 (3) M111.014126
intra	P02769	P02769	ALBU_BOVIN	ALBU_BOVIN	4f5s	PDB	B	B	547	568	523	544	LYS	LYS	CB	CB	21	19.7	27	DSS	http://www.mcponline.org/content/11/3/M111.014299	Leitner, A. et al. Expanding the chemical cross-linking toolbox by the use of multiple proteases and enrichment by size exclusion chromatography. Molecular & cellular proteomics (2012) vol.11 (3) M111.014126
intra	P02769	P02769	ALBU_BOVIN	ALBU_BOVIN	4f5s	PDB	A	A	437	489	413	465	LYS	LYS	CB	CB	52	19.8	57	DSS	http://www.mcponline.org/content/11/3/M111.014300	Leitner, A. et al. Expanding the chemical cross-linking toolbox by the use of multiple proteases and enrichment by size exclusion chromatography. Molecular & cellular proteomics (2012) vol.11 (3) M111.014126
intra	P02769	P02769	ALBU_BOVIN	ALBU_BOVIN	4f5s	PDB	B	B	245	374	221	350	LYS	LYS	CB	CB	129	20.9	31.5	DSS	http://www.mcponline.org/content/11/3/M111.014301	Leitner, A. et al. Expanding the chemical cross-linking toolbox by the use of multiple proteases and enrichment by size exclusion chromatography. Molecular & cellular proteomics (2012) vol.11 (3) M111.014126
intra	P02769	P02769	ALBU_BOVIN	ALBU_BOVIN	4f5s	PDB	B	B	245	263	221	239	LYS	LYS	CB	CB	18	18.4	32.3	DSS	http://www.mcponline.org/content/11/3/M111.014302	Leitner, A. et al. Expanding the chemical cross-linking toolbox by the use of multiple proteases and enrichment by size exclusion chromatography. Molecular & cellular proteomics (2012) vol.11 (3) M111.014126
intra	P02769	P02769	ALBU_BOVIN	ALBU_BOVIN	4f5s	PDB	A	A	340	561	316	537	LYS	LYS	CB	CB	221	56.8	70.6	DSS	http://www.mcponline.org/content/11/3/M111.014303	Leitner, A. et al. Expanding the chemical cross-linking toolbox by the use of multiple proteases and enrichment by size exclusion chromatography. Molecular & cellular proteomics (2012) vol.11 (3) M111.014126
intra	P02769	P02769	ALBU_BOVIN	ALBU_BOVIN	4f5s	PDB	B	B	245	266	221	242	LYS	LYS	CB	CB	21	20.1	38.1	DSS	http://www.mcponline.org/content/11/3/M111.014304	Leitner, A. et al. Expanding the chemical cross-linking toolbox by the use of multiple proteases and enrichment by size exclusion chromatography. Molecular & cellular proteomics (2012) vol.11 (3) M111.014126
inter	P04050	P08518	RPB1_YEAST	RPB2_YEAST	1wcm	PDB	A	B	1112	510	1112	510	LYS	LYS	CB	CB	734	16.7	19	BS3	http://www.nature.com/emboj/journal/v29/n4/full/emboj2009401a.html	Chen et al. Architecture of the RNA polymerase II-TFIIF complex revealed by cross-linking and mass spectrometry. Embo J (2010) vol. 29 (4) pp. 717-621	# low confident
inter	P04050	P08518	RPB1_YEAST	RPB2_YEAST	1wcm	PDB	A	B	343	864	343	864	LYS	LYS	CB	CB	1832	37.2	-	BS3	http://www.nature.com/emboj/journal/v29/n4/full/emboj2009401a.html	Chen et al. Architecture of the RNA polymerase II-TFIIF complex revealed by cross-linking and mass spectrometry. Embo J (2010) vol. 29 (4) pp. 717-621	# high confident; 1st residue seems solvent inaccessible
inter	P04050	P08518	RPB1_YEAST	RPB2_YEAST	1wcm	PDB	A	B	343	886	343	886	LYS	LYS	CB	CB	1854	29.7	-	BS3	http://www.nature.com/emboj/journal/v29/n4/full/emboj2009401a.html	Chen et al. Architecture of the RNA polymerase II-TFIIF complex revealed by cross-linking and mass spectrometry. Embo J (2010) vol. 29 (4) pp. 717-621	# high confident; 1st residue seems solvent inaccessible
inter	P04050	P08518	RPB1_YEAST	RPB2_YEAST	1wcm	PDB	A	B	372	886	372	886	LYS	LYS	CB	CB	1825	24.6	28.5	BS3	http://www.nature.com/emboj/journal/v29/n4/full/emboj2009401a.html	Chen et al. Architecture of the RNA polymerase II-TFIIF complex revealed by cross-linking and mass spectrometry. Embo J (2010) vol. 29 (4) pp. 717-621	# high confident
inter	P04050	P08518	RPB1_YEAST	RPB2_YEAST	1wcm	PDB	A	B	419	886	419	886	LYS	LYS	CB	CB	1778	24.1	30.2	BS3	http://www.nature.com/emboj/journal/v29/n4/full/emboj2009401a.html	Chen et al. Architecture of the RNA polymerase II-TFIIF complex revealed by cross-linking and mass spectrometry. Embo J (2010) vol. 29 (4) pp. 717-621	# low confident
inter	P04050	P08518	RPB1_YEAST	RPB2_YEAST	1wcm	PDB	A	B	419	892	419	892	LYS	LYS	CB	CB	1784	27.3	30.1	BS3	http://www.nature.com/emboj/journal/v29/n4/full/emboj2009401a.html	Chen et al. Architecture of the RNA polymerase II-TFIIF complex revealed by cross-linking and mass spectrometry. Embo J (2010) vol. 29 (4) pp. 717-621	# low confident
inter	P04050	P08518	RPB1_YEAST	RPB2_YEAST	1wcm	PDB	A	B	419	914	419	914	LYS	LYS	CB	CB	1806	34	-	BS3	http://www.nature.com/emboj/journal/v29/n4/full/emboj2009401a.html	Chen et al. Architecture of the RNA polymerase II-TFIIF complex revealed by cross-linking and mass spectrometry. Embo J (2010) vol. 29 (4) pp. 717-621	# low confident; distance exceeds 80 Å SASD
inter	P04050	P20434	RPB1_YEAST	RPAB1_YEAST	1wcm	PDB	A	E	1003	166	1003	166	LYS	LYS	CB	CB	2127	12.5	13.5	BS3	http://www.nature.com/emboj/journal/v29/n4/full/emboj2009401a.html	Chen et al. Architecture of the RNA polymerase II-TFIIF complex revealed by cross-linking and mass spectrometry. Embo J (2010) vol. 29 (4) pp. 717-621	# high confident
inter	P04050	P20434	RPB1_YEAST	RPAB1_YEAST	1wcm	PDB	A	E	129	161	129	161	LYS	LYS	CB	CB	2988	19.8	21.4	BS3	http://www.nature.com/emboj/journal/v29/n4/full/emboj2009401a.html	Chen et al. Architecture of the RNA polymerase II-TFIIF complex revealed by cross-linking and mass spectrometry. Embo J (2010) vol. 29 (4) pp. 717-621	# high confident
inter	P04050	P20434	RPB1_YEAST	RPAB1_YEAST	1wcm	PDB	A	E	129	171	129	171	LYS	LYS	CB	CB	2998	12.9	13.7	BS3	http://www.nature.com/emboj/journal/v29/n4/full/emboj2009401a.html	Chen et al. Architecture of the RNA polymerase II-TFIIF complex revealed by cross-linking and mass spectrometry. Embo J (2010) vol. 29 (4) pp. 717-621	# high confident
inter	P04050	P20434	RPB1_YEAST	RPAB1_YEAST	1wcm	PDB	A	E	15	171	15	171	LYS	LYS	CB	CB	3112	19.6	24	BS3	http://www.nature.com/emboj/journal/v29/n4/full/emboj2009401a.html	Chen et al. Architecture of the RNA polymerase II-TFIIF complex revealed by cross-linking and mass spectrometry. Embo J (2010) vol. 29 (4) pp. 717-621	# high confident
inter	P04050	P20434	RPB1_YEAST	RPAB1_YEAST	1wcm	PDB	A	E	934	201	934	201	LYS	LYS	CB	CB	2231	21.8	27	BS3	http://www.nature.com/emboj/journal/v29/n4/full/emboj2009401a.html	Chen et al. Architecture of the RNA polymerase II-TFIIF complex revealed by cross-linking and mass spectrometry. Embo J (2010) vol. 29 (4) pp. 717-621	# high confident
inter	P04050	P20434	RPB1_YEAST	RPAB1_YEAST	1wcm	PDB	A	E	938	201	938	201	LYS	LYS	CB	CB	2227	15.1	18	BS3	http://www.nature.com/emboj/journal/v29/n4/full/emboj2009401a.html	Chen et al. Architecture of the RNA polymerase II-TFIIF complex revealed by cross-linking and mass spectrometry. Embo J (2010) vol. 29 (4) pp. 717-621	# high confident
inter	P04050	P20435	RPB1_YEAST	RPAB2_YEAST	1wcm	PDB	A	F	1003	76	1003	76	LYS	LYS	CB	CB	2181	13.6	19.2	BS3	http://www.nature.com/emboj/journal/v29/n4/full/emboj2009401a.html	Chen et al. Architecture of the RNA polymerase II-TFIIF complex revealed by cross-linking and mass spectrometry. Embo J (2010) vol. 29 (4) pp. 717-621	# high confident
inter	P04050	P20435	RPB1_YEAST	RPAB2_YEAST	1wcm	PDB	A	F	15	72	15	72	LYS	LYS	CB	CB	3157	17.2	19.6	BS3	http://www.nature.com/emboj/journal/v29/n4/full/emboj2009401a.html	Chen et al. Architecture of the RNA polymerase II-TFIIF complex revealed by cross-linking and mass spectrometry. Embo J (2010) vol. 29 (4) pp. 717-621	# low confident
inter	P04050	P34087	RPB1_YEAST	RPB7_YEAST	1wcm	PDB	A	G	15	73	15	73	LYS	LYS	CB	CB	3313	21.2	23.4	BS3	http://www.nature.com/emboj/journal/v29/n4/full/emboj2009401a.html	Chen et al. Architecture of the RNA polymerase II-TFIIF complex revealed by cross-linking and mass spectrometry. Embo J (2010) vol. 29 (4) pp. 717-621	# high confident
inter	P04050	P27999	RPB1_YEAST	RPB9_YEAST	1wcm	PDB	A	I	695	117	695	117	LYS	LYS	CB	CB	2988	19	23	BS3	http://www.nature.com/emboj/journal/v29/n4/full/emboj2009401a.html	Chen et al. Architecture of the RNA polymerase II-TFIIF complex revealed by cross-linking and mass spectrometry. Embo J (2010) vol. 29 (4) pp. 717-621	# low confident
inter	P04050	P38902	RPB1_YEAST	RPB11_YEAST	1wcm	PDB	A	K	637	20	637	20	LYS	LYS	CB	CB	3134	32.8	38	BS3	http://www.nature.com/emboj/journal/v29/n4/full/emboj2009401a.html	Chen et al. Architecture of the RNA polymerase II-TFIIF complex revealed by cross-linking and mass spectrometry. Embo J (2010) vol. 29 (4) pp. 717-621	# high confident
inter	P04050	P38902	RPB1_YEAST	RPB11_YEAST	1wcm	PDB	A	K	637	26	637	26	LYS	LYS	CB	CB	3140	20	21.7	BS3	http://www.nature.com/emboj/journal/v29/n4/full/emboj2009401a.html	Chen et al. Architecture of the RNA polymerase II-TFIIF complex revealed by cross-linking and mass spectrometry. Embo J (2010) vol. 29 (4) pp. 717-621	# high confident
inter	P04050	P38902	RPB1_YEAST	RPB11_YEAST	1wcm	PDB	A	K	644	20	644	20	LYS	LYS	CB	CB	3127	25	27.2	BS3	http://www.nature.com/emboj/journal/v29/n4/full/emboj2009401a.html	Chen et al. Architecture of the RNA polymerase II-TFIIF complex revealed by cross-linking and mass spectrometry. Embo J (2010) vol. 29 (4) pp. 717-621	# high confident
inter	P04050	P38902	RPB1_YEAST	RPB11_YEAST	1wcm	PDB	A	K	644	26	644	26	LYS	LYS	CB	CB	3133	16.3	17.8	BS3	http://www.nature.com/emboj/journal/v29/n4/full/emboj2009401a.html	Chen et al. Architecture of the RNA polymerase II-TFIIF complex revealed by cross-linking and mass spectrometry. Embo J (2010) vol. 29 (4) pp. 717-621	# high confident
inter	P08518	P16370	RPB2_YEAST	RPB3_YEAST	1wcm	PDB	B	C	1057	199	1057	199	LYS	LYS	CB	CB	364	13.6	15	BS3	http://www.nature.com/emboj/journal/v29/n4/full/emboj2009401a.html	Chen et al. Architecture of the RNA polymerase II-TFIIF complex revealed by cross-linking and mass spectrometry. Embo J (2010) vol. 29 (4) pp. 717-621	# high confident
inter	P08518	P16370	RPB2_YEAST	RPB3_YEAST	1wcm	PDB	B	C	191	149	191	149	LYS	LYS	CB	CB	1120	12.4	14	BS3	http://www.nature.com/emboj/journal/v29/n4/full/emboj2009401a.html	Chen et al. Architecture of the RNA polymerase II-TFIIF complex revealed by cross-linking and mass spectrometry. Embo J (2010) vol. 29 (4) pp. 717-621	# high confident
inter	P08518	P22139	RPB2_YEAST	RPAB5_YEAST	1wcm	PDB	B	J	813	59	813	59	LYS	LYS	CB	CB	1621	11.9	14	BS3	http://www.nature.com/emboj/journal/v29/n4/full/emboj2009401a.html	Chen et al. Architecture of the RNA polymerase II-TFIIF complex revealed by cross-linking and mass spectrometry. Embo J (2010) vol. 29 (4) pp. 717-621	# high confident
inter	P08518	P40422	RPB2_YEAST	RPAB4_YEAST	1wcm	PDB	B	L	191	58	191	58	LYS	LYS	CB	CB	2351	22.4	43	BS3	http://www.nature.com/emboj/journal/v29/n4/full/emboj2009401a.html	Chen et al. Architecture of the RNA polymerase II-TFIIF complex revealed by cross-linking and mass spectrometry. Embo J (2010) vol. 29 (4) pp. 717-621	# low confident
inter	P08518	P40422	RPB2_YEAST	RPAB4_YEAST	1wcm	PDB	B	L	876	62	876	62	LYS	LYS	CB	CB	1717	18	20.7	BS3	http://www.nature.com/emboj/journal/v29/n4/full/emboj2009401a.html	Chen et al. Architecture of the RNA polymerase II-TFIIF complex revealed by cross-linking and mass spectrometry. Embo J (2010) vol. 29 (4) pp. 717-621	# low confident
inter	P08518	P40422	RPB2_YEAST	RPAB4_YEAST	1wcm	PDB	B	L	962	58	962	58	LYS	LYS	CB	CB	1640	13	15.9	BS3	http://www.nature.com/emboj/journal/v29/n4/full/emboj2009401a.html	Chen et al. Architecture of the RNA polymerase II-TFIIF complex revealed by cross-linking and mass spectrometry. Embo J (2010) vol. 29 (4) pp. 717-621	# low confident
inter	P16370	P22139	RPB3_YEAST	RPAB5_YEAST	1wcm	PDB	C	J	137	42	137	42	LYS	LYS	CB	CB	1071	17.9	21	BS3	http://www.nature.com/emboj/journal/v29/n4/full/emboj2009401a.html	Chen et al. Architecture of the RNA polymerase II-TFIIF complex revealed by cross-linking and mass spectrometry. Embo J (2010) vol. 29 (4) pp. 717-621	# low confident
inter	P16370	P22139	RPB3_YEAST	RPAB5_YEAST	1wcm	PDB	C	J	15	42	15	42	LYS	LYS	CB	CB	1193	16	18.2	BS3	http://www.nature.com/emboj/journal/v29/n4/full/emboj2009401a.html	Chen et al. Architecture of the RNA polymerase II-TFIIF complex revealed by cross-linking and mass spectrometry. Embo J (2010) vol. 29 (4) pp. 717-621	# low confident
inter	P16370	P38902	RPB3_YEAST	RPB11_YEAST	1wcm	PDB	C	K	160	37	160	37	LYS	LYS	CB	CB	1108	19.4	25.6	BS3	http://www.nature.com/emboj/journal/v29/n4/full/emboj2009401a.html	Chen et al. Architecture of the RNA polymerase II-TFIIF complex revealed by cross-linking and mass spectrometry. Embo J (2010) vol. 29 (4) pp. 717-621	# high confident
inter	P16370	P40422	RPB3_YEAST	RPAB4_YEAST	1wcm	PDB	C	L	149	37	149	37	LYS	LYS	CB	CB	1210	15.5	17.6	BS3	http://www.nature.com/emboj/journal/v29/n4/full/emboj2009401a.html	Chen et al. Architecture of the RNA polymerase II-TFIIF complex revealed by cross-linking and mass spectrometry. Embo J (2010) vol. 29 (4) pp. 717-621	# low confident
inter	P16370	P40422	RPB3_YEAST	RPAB4_YEAST	1wcm	PDB	C	L	154	62	154	62	LYS	LYS	CB	CB	1230	11.8	14.6	BS3	http://www.nature.com/emboj/journal/v29/n4/full/emboj2009401a.html	Chen et al. Architecture of the RNA polymerase II-TFIIF complex revealed by cross-linking and mass spectrometry. Embo J (2010) vol. 29 (4) pp. 717-621	# high confident
inter	P20434	P20435	RPAB1_YEAST	RPAB2_YEAST	1wcm	PDB	E	F	171	72	171	72	LYS	LYS	CB	CB	45	14.4	15.6	BS3	http://www.nature.com/emboj/journal/v29/n4/full/emboj2009401a.html	Chen et al. Architecture of the RNA polymerase II-TFIIF complex revealed by cross-linking and mass spectrometry. Embo J (2010) vol. 29 (4) pp. 717-621	# high confident
inter	P20435	P34087	RPAB2_YEAST	RPB7_YEAST	1wcm	PDB	F	G	72	73	72	73	LYS	LYS	CB	CB	156	18.2	23.4	BS3	http://www.nature.com/emboj/journal/v29/n4/full/emboj2009401a.html	Chen et al. Architecture of the RNA polymerase II-TFIIF complex revealed by cross-linking and mass spectrometry. Embo J (2010) vol. 29 (4) pp. 717-621	# high confident
intra	P04050	P04050	RPB1_YEAST	RPB1_YEAST	1wcm	PDB	A	A	101	143	101	143	LYS	LYS	CB	CB	42	7.9	8.6	BS3	http://www.nature.com/emboj/journal/v29/n4/full/emboj2009401a.html	Chen et al. Architecture of the RNA polymerase II-TFIIF complex revealed by cross-linking and mass spectrometry. Embo J (2010) vol. 29 (4) pp. 717-621	# high confident
intra	P04050	P04050	RPB1_YEAST	RPB1_YEAST	1wcm	PDB	A	A	101	176	101	176	LYS	LYS	CB	CB	75	10.4	12.4	BS3	http://www.nature.com/emboj/journal/v29/n4/full/emboj2009401a.html	Chen et al. Architecture of the RNA polymerase II-TFIIF complex revealed by cross-linking and mass spectrometry. Embo J (2010) vol. 29 (4) pp. 717-621	# high confident
intra	P04050	P04050	RPB1_YEAST	RPB1_YEAST	1wcm	PDB	A	A	1093	1102	1093	1102	LYS	LYS	CB	CB	9	18.7	23.3	BS3	http://www.nature.com/emboj/journal/v29/n4/full/emboj2009401a.html	Chen et al. Architecture of the RNA polymerase II-TFIIF complex revealed by cross-linking and mass spectrometry. Embo J (2010) vol. 29 (4) pp. 717-621	# high confident
intra	P04050	P04050	RPB1_YEAST	RPB1_YEAST	1wcm	PDB	A	A	1093	1112	1093	1112	LYS	LYS	CB	CB	19	11.1	13	BS3	http://www.nature.com/emboj/journal/v29/n4/full/emboj2009401a.html	Chen et al. Architecture of the RNA polymerase II-TFIIF complex revealed by cross-linking and mass spectrometry. Embo J (2010) vol. 29 (4) pp. 717-621	# high confident
intra	P04050	P04050	RPB1_YEAST	RPB1_YEAST	1wcm	PDB	A	A	1102	1112	1102	1112	LYS	LYS	CB	CB	10	11	13	BS3	http://www.nature.com/emboj/journal/v29/n4/full/emboj2009401a.html	Chen et al. Architecture of the RNA polymerase II-TFIIF complex revealed by cross-linking and mass spectrometry. Embo J (2010) vol. 29 (4) pp. 717-621	# high confident
intra	P04050	P04050	RPB1_YEAST	RPB1_YEAST	1wcm	PDB	A	A	1132	1205	1132	1205	LYS	LYS	CB	CB	63	10.7	14.5	BS3	http://www.nature.com/emboj/journal/v29/n4/full/emboj2009401a.html	Chen et al. Architecture of the RNA polymerase II-TFIIF complex revealed by cross-linking and mass spectrometry. Embo J (2010) vol. 29 (4) pp. 717-621	# high confident
intra	P04050	P04050	RPB1_YEAST	RPB1_YEAST	1wcm	PDB	A	A	1132	1286	1132	1286	LYS	LYS	CB	CB	134	13.6	15.9	BS3	http://www.nature.com/emboj/journal/v29/n4/full/emboj2009401a.html	Chen et al. Architecture of the RNA polymerase II-TFIIF complex revealed by cross-linking and mass spectrometry. Embo J (2010) vol. 29 (4) pp. 717-621	# high confident
intra	P04050	P04050	RPB1_YEAST	RPB1_YEAST	1wcm	PDB	A	A	1221	1262	1221	1262	LYS	LYS	CB	CB	31	16.5	21	BS3	http://www.nature.com/emboj/journal/v29/n4/full/emboj2009401a.html	Chen et al. Architecture of the RNA polymerase II-TFIIF complex revealed by cross-linking and mass spectrometry. Embo J (2010) vol. 29 (4) pp. 717-621	# high confident
intra	P04050	P04050	RPB1_YEAST	RPB1_YEAST	1wcm	PDB	A	A	1286	1300	1286	1300	LYS	LYS	CB	CB	14	11	13	BS3	http://www.nature.com/emboj/journal/v29/n4/full/emboj2009401a.html	Chen et al. Architecture of the RNA polymerase II-TFIIF complex revealed by cross-linking and mass spectrometry. Embo J (2010) vol. 29 (4) pp. 717-621	# low confident
intra	P04050	P04050	RPB1_YEAST	RPB1_YEAST	1wcm	PDB	A	A	143	176	143	176	LYS	LYS	CB	CB	33	13.6	15	BS3	http://www.nature.com/emboj/journal/v29/n4/full/emboj2009401a.html	Chen et al. Architecture of the RNA polymerase II-TFIIF complex revealed by cross-linking and mass spectrometry. Embo J (2010) vol. 29 (4) pp. 717-621	# low confident
intra	P04050	P04050	RPB1_YEAST	RPB1_YEAST	1wcm	PDB	A	A	145	186	145	186	LYS	LYS	CB	CB	41	14	19.4	BS3	http://www.nature.com/emboj/journal/v29/n4/full/emboj2009401a.html	Chen et al. Architecture of the RNA polymerase II-TFIIF complex revealed by cross-linking and mass spectrometry. Embo J (2010) vol. 29 (4) pp. 717-621	# low confident
intra	P04050	P04050	RPB1_YEAST	RPB1_YEAST	1wcm	PDB	A	A	34	49	34	49	LYS	LYS	CB	CB	15	13.1	20.9	BS3	http://www.nature.com/emboj/journal/v29/n4/full/emboj2009401a.html	Chen et al. Architecture of the RNA polymerase II-TFIIF complex revealed by cross-linking and mass spectrometry. Embo J (2010) vol. 29 (4) pp. 717-621	# high confident
intra	P04050	P04050	RPB1_YEAST	RPB1_YEAST	1wcm	PDB	A	A	368	461	368	461	LYS	LYS	CB	CB	93	10.8	17.7	BS3	http://www.nature.com/emboj/journal/v29/n4/full/emboj2009401a.html	Chen et al. Architecture of the RNA polymerase II-TFIIF complex revealed by cross-linking and mass spectrometry. Embo J (2010) vol. 29 (4) pp. 717-621	# high confident
intra	P04050	P04050	RPB1_YEAST	RPB1_YEAST	1wcm	PDB	A	A	372	403	372	403	LYS	LYS	CB	CB	31	8	13.8	BS3	http://www.nature.com/emboj/journal/v29/n4/full/emboj2009401a.html	Chen et al. Architecture of the RNA polymerase II-TFIIF complex revealed by cross-linking and mass spectrometry. Embo J (2010) vol. 29 (4) pp. 717-621	# high confident
intra	P04050	P04050	RPB1_YEAST	RPB1_YEAST	1wcm	PDB	A	A	372	419	372	419	LYS	LYS	CB	CB	47	22.6	29.5	BS3	http://www.nature.com/emboj/journal/v29/n4/full/emboj2009401a.html	Chen et al. Architecture of the RNA polymerase II-TFIIF complex revealed by cross-linking and mass spectrometry. Embo J (2010) vol. 29 (4) pp. 717-621	# low confident
intra	P04050	P04050	RPB1_YEAST	RPB1_YEAST	1wcm	PDB	A	A	461	637	461	637	LYS	LYS	CB	CB	176	24.1	28.6	BS3	http://www.nature.com/emboj/journal/v29/n4/full/emboj2009401a.html	Chen et al. Architecture of the RNA polymerase II-TFIIF complex revealed by cross-linking and mass spectrometry. Embo J (2010) vol. 29 (4) pp. 717-621	# high confident
intra	P04050	P04050	RPB1_YEAST	RPB1_YEAST	1wcm	PDB	A	A	461	644	461	644	LYS	LYS	CB	CB	183	15.4	17.1	BS3	http://www.nature.com/emboj/journal/v29/n4/full/emboj2009401a.html	Chen et al. Architecture of the RNA polymerase II-TFIIF complex revealed by cross-linking and mass spectrometry. Embo J (2010) vol. 29 (4) pp. 717-621	# high confident
intra	P04050	P04050	RPB1_YEAST	RPB1_YEAST	1wcm	PDB	A	A	688	728	688	728	LYS	LYS	CB	CB	40	15.8	20.8	BS3	http://www.nature.com/emboj/journal/v29/n4/full/emboj2009401a.html	Chen et al. Architecture of the RNA polymerase II-TFIIF complex revealed by cross-linking and mass spectrometry. Embo J (2010) vol. 29 (4) pp. 717-621	# high confident
intra	P04050	P04050	RPB1_YEAST	RPB1_YEAST	1wcm	PDB	A	A	689	705	689	705	LYS	LYS	CB	CB	16	18.2	21.3	BS3	http://www.nature.com/emboj/journal/v29/n4/full/emboj2009401a.html	Chen et al. Architecture of the RNA polymerase II-TFIIF complex revealed by cross-linking and mass spectrometry. Embo J (2010) vol. 29 (4) pp. 717-621	# high confident
intra	P04050	P04050	RPB1_YEAST	RPB1_YEAST	1wcm	PDB	A	A	689	728	689	728	LYS	LYS	CB	CB	39	12.4	13.9	BS3	http://www.nature.com/emboj/journal/v29/n4/full/emboj2009401a.html	Chen et al. Architecture of the RNA polymerase II-TFIIF complex revealed by cross-linking and mass spectrometry. Embo J (2010) vol. 29 (4) pp. 717-621	# high confident
intra	P04050	P04050	RPB1_YEAST	RPB1_YEAST	1wcm	PDB	A	A	705	1093	705	1093	LYS	LYS	CB	CB	378	13.5	14.1	BS3	http://www.nature.com/emboj/journal/v29/n4/full/emboj2009401a.html	Chen et al. Architecture of the RNA polymerase II-TFIIF complex revealed by cross-linking and mass spectrometry. Embo J (2010) vol. 29 (4) pp. 717-621	# high confident
intra	P04050	P04050	RPB1_YEAST	RPB1_YEAST	1wcm	PDB	A	A	705	1132	705	1132	LYS	LYS	CB	CB	417	14.7	16	BS3	http://www.nature.com/emboj/journal/v29/n4/full/emboj2009401a.html	Chen et al. Architecture of the RNA polymerase II-TFIIF complex revealed by cross-linking and mass spectrometry. Embo J (2010) vol. 29 (4) pp. 717-621	# high confident
intra	P04050	P04050	RPB1_YEAST	RPB1_YEAST	1wcm	PDB	A	A	705	1286	705	1286	LYS	LYS	CB	CB	551	15.1	16.1	BS3	http://www.nature.com/emboj/journal/v29/n4/full/emboj2009401a.html	Chen et al. Architecture of the RNA polymerase II-TFIIF complex revealed by cross-linking and mass spectrometry. Embo J (2010) vol. 29 (4) pp. 717-621	# high confident
intra	P04050	P04050	RPB1_YEAST	RPB1_YEAST	1wcm	PDB	A	A	728	738	728	738	LYS	LYS	CB	CB	10	19.7	24.5	BS3	http://www.nature.com/emboj/journal/v29/n4/full/emboj2009401a.html	Chen et al. Architecture of the RNA polymerase II-TFIIF complex revealed by cross-linking and mass spectrometry. Embo J (2010) vol. 29 (4) pp. 717-621	# low confident
intra	P04050	P04050	RPB1_YEAST	RPB1_YEAST	1wcm	PDB	A	A	773	1093	773	1093	LYS	LYS	CB	CB	310	11.9	14.3	BS3	http://www.nature.com/emboj/journal/v29/n4/full/emboj2009401a.html	Chen et al. Architecture of the RNA polymerase II-TFIIF complex revealed by cross-linking and mass spectrometry. Embo J (2010) vol. 29 (4) pp. 717-621	# high confident
intra	P04050	P04050	RPB1_YEAST	RPB1_YEAST	1wcm	PDB	A	A	773	1112	773	1112	LYS	LYS	CB	CB	329	16.6	19.1	BS3	http://www.nature.com/emboj/journal/v29/n4/full/emboj2009401a.html	Chen et al. Architecture of the RNA polymerase II-TFIIF complex revealed by cross-linking and mass spectrometry. Embo J (2010) vol. 29 (4) pp. 717-621	# high confident
intra	P04050	P04050	RPB1_YEAST	RPB1_YEAST	1wcm	PDB	A	A	830	1093	830	1093	LYS	LYS	CB	CB	253	19	21.3	BS3	http://www.nature.com/emboj/journal/v29/n4/full/emboj2009401a.html	Chen et al. Architecture of the RNA polymerase II-TFIIF complex revealed by cross-linking and mass spectrometry. Embo J (2010) vol. 29 (4) pp. 717-621	# high confident
intra	P04050	P04050	RPB1_YEAST	RPB1_YEAST	1wcm	PDB	A	A	830	1102	830	1102	LYS	LYS	CB	CB	262	10.3	14.2	BS3	http://www.nature.com/emboj/journal/v29/n4/full/emboj2009401a.html	Chen et al. Architecture of the RNA polymerase II-TFIIF complex revealed by cross-linking and mass spectrometry. Embo J (2010) vol. 29 (4) pp. 717-621	# high confident
intra	P04050	P04050	RPB1_YEAST	RPB1_YEAST	1wcm	PDB	A	A	830	1112	830	1112	LYS	LYS	CB	CB	272	16.3	18.1	BS3	http://www.nature.com/emboj/journal/v29/n4/full/emboj2009401a.html	Chen et al. Architecture of the RNA polymerase II-TFIIF complex revealed by cross-linking and mass spectrometry. Embo J (2010) vol. 29 (4) pp. 717-621	# high confident
intra	P04050	P04050	RPB1_YEAST	RPB1_YEAST	1wcm	PDB	A	A	934	941	934	941	LYS	LYS	CB	CB	7	11.2	13.4	BS3	http://www.nature.com/emboj/journal/v29/n4/full/emboj2009401a.html	Chen et al. Architecture of the RNA polymerase II-TFIIF complex revealed by cross-linking and mass spectrometry. Embo J (2010) vol. 29 (4) pp. 717-621	# high confident
intra	P04050	P04050	RPB1_YEAST	RPB1_YEAST	1wcm	PDB	A	A	938	991	938	991	LYS	LYS	CB	CB	53	14.6	16	BS3	http://www.nature.com/emboj/journal/v29/n4/full/emboj2009401a.html	Chen et al. Architecture of the RNA polymerase II-TFIIF complex revealed by cross-linking and mass spectrometry. Embo J (2010) vol. 29 (4) pp. 717-621	# high confident
intra	P08518	P08518	RPB2_YEAST	RPB2_YEAST	1wcm	PDB	B	B	228	246	228	246	LYS	LYS	CB	CB	18	33.9	41.2	BS3	http://www.nature.com/emboj/journal/v29/n4/full/emboj2009401a.html	Chen et al. Architecture of the RNA polymerase II-TFIIF complex revealed by cross-linking and mass spectrometry. Embo J (2010) vol. 29 (4) pp. 717-621	# high confident
intra	P08518	P08518	RPB2_YEAST	RPB2_YEAST	1wcm	PDB	B	B	228	257	228	257	LYS	LYS	CB	CB	29	9.3	13.8	BS3	http://www.nature.com/emboj/journal/v29/n4/full/emboj2009401a.html	Chen et al. Architecture of the RNA polymerase II-TFIIF complex revealed by cross-linking and mass spectrometry. Embo J (2010) vol. 29 (4) pp. 717-621	# high confident
intra	P08518	P08518	RPB2_YEAST	RPB2_YEAST	1wcm	PDB	B	B	228	270	228	270	LYS	LYS	CB	CB	42	13.9	17.8	BS3	http://www.nature.com/emboj/journal/v29/n4/full/emboj2009401a.html	Chen et al. Architecture of the RNA polymerase II-TFIIF complex revealed by cross-linking and mass spectrometry. Embo J (2010) vol. 29 (4) pp. 717-621	# high confident
intra	P08518	P08518	RPB2_YEAST	RPB2_YEAST	1wcm	PDB	B	B	228	277	228	277	LYS	LYS	CB	CB	49	21.2	25.1	BS3	http://www.nature.com/emboj/journal/v29/n4/full/emboj2009401a.html	Chen et al. Architecture of the RNA polymerase II-TFIIF complex revealed by cross-linking and mass spectrometry. Embo J (2010) vol. 29 (4) pp. 717-621	# high confident
intra	P08518	P08518	RPB2_YEAST	RPB2_YEAST	1wcm	PDB	B	B	228	510	228	510	LYS	LYS	CB	CB	250	16.9	20.5	BS3	http://www.nature.com/emboj/journal/v29/n4/full/emboj2009401a.html	Chen et al. Architecture of the RNA polymerase II-TFIIF complex revealed by cross-linking and mass spectrometry. Embo J (2010) vol. 29 (4) pp. 717-621	# high confident
intra	P08518	P08518	RPB2_YEAST	RPB2_YEAST	1wcm	PDB	B	B	246	358	246	358	LYS	LYS	CB	CB	103	15.7	19.9	BS3	http://www.nature.com/emboj/journal/v29/n4/full/emboj2009401a.html	Chen et al. Architecture of the RNA polymerase II-TFIIF complex revealed by cross-linking and mass spectrometry. Embo J (2010) vol. 29 (4) pp. 717-621	# high confident
intra	P08518	P08518	RPB2_YEAST	RPB2_YEAST	1wcm	PDB	B	B	246	426	246	426	LYS	LYS	CB	CB	171	19.8	26.1	BS3	http://www.nature.com/emboj/journal/v29/n4/full/emboj2009401a.html	Chen et al. Architecture of the RNA polymerase II-TFIIF complex revealed by cross-linking and mass spectrometry. Embo J (2010) vol. 29 (4) pp. 717-621	# high confident
intra	P08518	P08518	RPB2_YEAST	RPB2_YEAST	1wcm	PDB	B	B	277	345	277	345	LYS	LYS	CB	CB	59	18.2	21.2	BS3	http://www.nature.com/emboj/journal/v29/n4/full/emboj2009401a.html	Chen et al. Architecture of the RNA polymerase II-TFIIF complex revealed by cross-linking and mass spectrometry. Embo J (2010) vol. 29 (4) pp. 717-621	# low confident
intra	P08518	P08518	RPB2_YEAST	RPB2_YEAST	1wcm	PDB	B	B	277	347	277	347	LYS	LYS	CB	CB	61	16.2	17.4	BS3	http://www.nature.com/emboj/journal/v29/n4/full/emboj2009401a.html	Chen et al. Architecture of the RNA polymerase II-TFIIF complex revealed by cross-linking and mass spectrometry. Embo J (2010) vol. 29 (4) pp. 717-621	# low confident
intra	P08518	P08518	RPB2_YEAST	RPB2_YEAST	1wcm	PDB	B	B	345	353	345	353	LYS	LYS	CB	CB	8	13.9	19	BS3	http://www.nature.com/emboj/journal/v29/n4/full/emboj2009401a.html	Chen et al. Architecture of the RNA polymerase II-TFIIF complex revealed by cross-linking and mass spectrometry. Embo J (2010) vol. 29 (4) pp. 717-621	# high confident
intra	P08518	P08518	RPB2_YEAST	RPB2_YEAST	1wcm	PDB	B	B	347	353	347	353	LYS	LYS	CB	CB	6	11.8	19.4	BS3	http://www.nature.com/emboj/journal/v29/n4/full/emboj2009401a.html	Chen et al. Architecture of the RNA polymerase II-TFIIF complex revealed by cross-linking and mass spectrometry. Embo J (2010) vol. 29 (4) pp. 717-621	# low confident
intra	P08518	P08518	RPB2_YEAST	RPB2_YEAST	1wcm	PDB	B	B	347	358	347	358	LYS	LYS	CB	CB	11	17.6	20.9	BS3	http://www.nature.com/emboj/journal/v29/n4/full/emboj2009401a.html	Chen et al. Architecture of the RNA polymerase II-TFIIF complex revealed by cross-linking and mass spectrometry. Embo J (2010) vol. 29 (4) pp. 717-621	# low confident
intra	P08518	P08518	RPB2_YEAST	RPB2_YEAST	1wcm	PDB	B	B	358	422	358	422	LYS	LYS	CB	CB	64	18.6	19.6	BS3	http://www.nature.com/emboj/journal/v29/n4/full/emboj2009401a.html	Chen et al. Architecture of the RNA polymerase II-TFIIF complex revealed by cross-linking and mass spectrometry. Embo J (2010) vol. 29 (4) pp. 717-621	# high confident
intra	P08518	P08518	RPB2_YEAST	RPB2_YEAST	1wcm	PDB	B	B	422	426	422	426	LYS	LYS	CB	CB	4	6.1	7.9	BS3	http://www.nature.com/emboj/journal/v29/n4/full/emboj2009401a.html	Chen et al. Architecture of the RNA polymerase II-TFIIF complex revealed by cross-linking and mass spectrometry. Embo J (2010) vol. 29 (4) pp. 717-621	# high confident
intra	P08518	P08518	RPB2_YEAST	RPB2_YEAST	1wcm	PDB	B	B	606	652	606	652	LYS	LYS	CB	CB	46	13.2	13.8	BS3	http://www.nature.com/emboj/journal/v29/n4/full/emboj2009401a.html	Chen et al. Architecture of the RNA polymerase II-TFIIF complex revealed by cross-linking and mass spectrometry. Embo J (2010) vol. 29 (4) pp. 717-621	# high confident
intra	P08518	P08518	RPB2_YEAST	RPB2_YEAST	1wcm	PDB	B	B	864	886	864	886	LYS	LYS	CB	CB	22	18.1	21.1	BS3	http://www.nature.com/emboj/journal/v29/n4/full/emboj2009401a.html	Chen et al. Architecture of the RNA polymerase II-TFIIF complex revealed by cross-linking and mass spectrometry. Embo J (2010) vol. 29 (4) pp. 717-621	# low confident
intra	P08518	P08518	RPB2_YEAST	RPB2_YEAST	1wcm	PDB	B	B	864	934	864	934	LYS	LYS	CB	CB	57	15.9	34.4	BS3	http://www.nature.com/emboj/journal/v29/n4/full/emboj2009401a.html	Chen et al. Architecture of the RNA polymerase II-TFIIF complex revealed by cross-linking and mass spectrometry. Embo J (2010) vol. 29 (4) pp. 717-621	# high confident
intra	P08518	P08518	RPB2_YEAST	RPB2_YEAST	1wcm	PDB	B	B	876	886	876	886	LYS	LYS	CB	CB	10	12.2	22.5	BS3	http://www.nature.com/emboj/journal/v29/n4/full/emboj2009401a.html	Chen et al. Architecture of the RNA polymerase II-TFIIF complex revealed by cross-linking and mass spectrometry. Embo J (2010) vol. 29 (4) pp. 717-621	# high confident
intra	P08518	P08518	RPB2_YEAST	RPB2_YEAST	1wcm	PDB	B	B	934	962	934	962	LYS	LYS	CB	CB	28	18	24.2	BS3	http://www.nature.com/emboj/journal/v29/n4/full/emboj2009401a.html	Chen et al. Architecture of the RNA polymerase II-TFIIF complex revealed by cross-linking and mass spectrometry. Embo J (2010) vol. 29 (4) pp. 717-621	# low confident
intra	P08518	P08518	RPB2_YEAST	RPB2_YEAST	1wcm	PDB	B	B	934	972	934	972	LYS	LYS	CB	CB	38	37.2	57.9	BS3	http://www.nature.com/emboj/journal/v29/n4/full/emboj2009401a.html	Chen et al. Architecture of the RNA polymerase II-TFIIF complex revealed by cross-linking and mass spectrometry. Embo J (2010) vol. 29 (4) pp. 717-621	# high confident
intra	P08518	P08518	RPB2_YEAST	RPB2_YEAST	1wcm	PDB	B	B	979	1102	979	1102	LYS	LYS	CB	CB	123	10.1	15.5	BS3	http://www.nature.com/emboj/journal/v29/n4/full/emboj2009401a.html	Chen et al. Architecture of the RNA polymerase II-TFIIF complex revealed by cross-linking and mass spectrometry. Embo J (2010) vol. 29 (4) pp. 717-621	# high confident
intra	P08518	P08518	RPB2_YEAST	RPB2_YEAST	1wcm	PDB	B	B	979	987	979	987	LYS	LYS	CB	CB	8	6.7	6.8	BS3	http://www.nature.com/emboj/journal/v29/n4/full/emboj2009401a.html	Chen et al. Architecture of the RNA polymerase II-TFIIF complex revealed by cross-linking and mass spectrometry. Embo J (2010) vol. 29 (4) pp. 717-621	# high confident
intra	P08518	P08518	RPB2_YEAST	RPB2_YEAST	1wcm	PDB	B	B	99	164	99	164	LYS	LYS	CB	CB	36	18	23	BS3	http://www.nature.com/emboj/journal/v29/n4/full/emboj2009401a.html	Chen et al. Architecture of the RNA polymerase II-TFIIF complex revealed by cross-linking and mass spectrometry. Embo J (2010) vol. 29 (4) pp. 717-621	# high confident
intra	P08518	P08518	RPB2_YEAST	RPB2_YEAST	1wcm	PDB	B	B	99	191	99	191	LYS	LYS	CB	CB	63	17.9	19.8	BS3	http://www.nature.com/emboj/journal/v29/n4/full/emboj2009401a.html	Chen et al. Architecture of the RNA polymerase II-TFIIF complex revealed by cross-linking and mass spectrometry. Embo J (2010) vol. 29 (4) pp. 717-621	# high confident
intra	P16370	P16370	RPB3_YEAST	RPB3_YEAST	1wcm	PDB	C	C	15	137	15	137	LYS	LYS	CB	CB	122	14.2	16.3	BS3	http://www.nature.com/emboj/journal/v29/n4/full/emboj2009401a.html	Chen et al. Architecture of the RNA polymerase II-TFIIF complex revealed by cross-linking and mass spectrometry. Embo J (2010) vol. 29 (4) pp. 717-621	# high confident
intra	P20433	P20433	RPB4_YEAST	RPB4_YEAST	1wcm	PDB	D	D	60	121	60	121	LYS	LYS	CB	CB	20	13.7	17.2	BS3	http://www.nature.com/emboj/journal/v29/n4/full/emboj2009401a.html	Chen et al. Architecture of the RNA polymerase II-TFIIF complex revealed by cross-linking and mass spectrometry. Embo J (2010) vol. 29 (4) pp. 717-621	# high confident
intra	P20433	P20433	RPB4_YEAST	RPB4_YEAST	1wcm	PDB	D	D	60	142	60	142	LYS	LYS	CB	CB	41	13.7	37.4	BS3	http://www.nature.com/emboj/journal/v29/n4/full/emboj2009401a.html	Chen et al. Architecture of the RNA polymerase II-TFIIF complex revealed by cross-linking and mass spectrometry. Embo J (2010) vol. 29 (4) pp. 717-621	# high confident
intra	P20433	P20433	RPB4_YEAST	RPB4_YEAST	1wcm	PDB	D	D	60	71	60	71	LYS	LYS	CB	CB	11	17.5	22.5	BS3	http://www.nature.com/emboj/journal/v29/n4/full/emboj2009401a.html	Chen et al. Architecture of the RNA polymerase II-TFIIF complex revealed by cross-linking and mass spectrometry. Embo J (2010) vol. 29 (4) pp. 717-621	# high confident
intra	P20434	P20434	RPAB1_YEAST	RPAB1_YEAST	1wcm	PDB	E	E	161	171	161	171	LYS	LYS	CB	CB	10	12.9	17.1	BS3	http://www.nature.com/emboj/journal/v29/n4/full/emboj2009401a.html	Chen et al. Architecture of the RNA polymerase II-TFIIF complex revealed by cross-linking and mass spectrometry. Embo J (2010) vol. 29 (4) pp. 717-621	# high confident
intra	P20434	P20434	RPAB1_YEAST	RPAB1_YEAST	1wcm	PDB	E	E	161	191	161	191	LYS	LYS	CB	CB	30	11.8	14.3	BS3	http://www.nature.com/emboj/journal/v29/n4/full/emboj2009401a.html	Chen et al. Architecture of the RNA polymerase II-TFIIF complex revealed by cross-linking and mass spectrometry. Embo J (2010) vol. 29 (4) pp. 717-621	# high confident
intra	P20434	P20434	RPAB1_YEAST	RPAB1_YEAST	1wcm	PDB	E	E	166	171	166	171	LYS	LYS	CB	CB	5	11.2	14.4	BS3	http://www.nature.com/emboj/journal/v29/n4/full/emboj2009401a.html	Chen et al. Architecture of the RNA polymerase II-TFIIF complex revealed by cross-linking and mass spectrometry. Embo J (2010) vol. 29 (4) pp. 717-621	# high confident
intra	P20434	P20434	RPAB1_YEAST	RPAB1_YEAST	1wcm	PDB	E	E	191	197	191	197	LYS	LYS	CB	CB	6	15.7	27.5	BS3	http://www.nature.com/emboj/journal/v29/n4/full/emboj2009401a.html	Chen et al. Architecture of the RNA polymerase II-TFIIF complex revealed by cross-linking and mass spectrometry. Embo J (2010) vol. 29 (4) pp. 717-621	# high confident
intra	P20434	P20434	RPAB1_YEAST	RPAB1_YEAST	1wcm	PDB	E	E	20	45	20	45	LYS	LYS	CB	CB	25	14.1	14.8	BS3	http://www.nature.com/emboj/journal/v29/n4/full/emboj2009401a.html	Chen et al. Architecture of the RNA polymerase II-TFIIF complex revealed by cross-linking and mass spectrometry. Embo J (2010) vol. 29 (4) pp. 717-621	# high confident
intra	P20434	P20434	RPAB1_YEAST	RPAB1_YEAST	1wcm	PDB	E	E	45	56	45	56	LYS	LYS	CB	CB	11	13.4	20.9	BS3	http://www.nature.com/emboj/journal/v29/n4/full/emboj2009401a.html	Chen et al. Architecture of the RNA polymerase II-TFIIF complex revealed by cross-linking and mass spectrometry. Embo J (2010) vol. 29 (4) pp. 717-621	# low confident
intra	P20435	P20435	RPAB2_YEAST	RPAB2_YEAST	1wcm	PDB	F	F	123	129	123	129	LYS	LYS	CB	CB	6	8.5	16.9	BS3	http://www.nature.com/emboj/journal/v29/n4/full/emboj2009401a.html	Chen et al. Architecture of the RNA polymerase II-TFIIF complex revealed by cross-linking and mass spectrometry. Embo J (2010) vol. 29 (4) pp. 717-621	# high confident
intra	P38902	P38902	RPB11_YEAST	RPB11_YEAST	1wcm	PDB	K	K	20	37	20	37	LYS	LYS	CB	CB	17	11.9	18.6	BS3	http://www.nature.com/emboj/journal/v29/n4/full/emboj2009401a.html	Chen et al. Architecture of the RNA polymerase II-TFIIF complex revealed by cross-linking and mass spectrometry. Embo J (2010) vol. 29 (4) pp. 717-621	# high confident
intra	P38902	P38902	RPB11_YEAST	RPB11_YEAST	1wcm	PDB	K	K	55	84	55	84	LYS	LYS	CB	CB	29	12.6	22.3	BS3	http://www.nature.com/emboj/journal/v29/n4/full/emboj2009401a.html	Chen et al. Architecture of the RNA polymerase II-TFIIF complex revealed by cross-linking and mass spectrometry. Embo J (2010) vol. 29 (4) pp. 717-621	# high confident
intra	P38902	P38902	RPB11_YEAST	RPB11_YEAST	1wcm	PDB	K	K	55	88	55	88	LYS	LYS	CB	CB	33	12.3	16.2	BS3	http://www.nature.com/emboj/journal/v29/n4/full/emboj2009401a.html	Chen et al. Architecture of the RNA polymerase II-TFIIF complex revealed by cross-linking and mass spectrometry. Embo J (2010) vol. 29 (4) pp. 717-621	# high confident
intra	P40422	P40422	RPAB4_YEAST	RPAB4_YEAST	1wcm	PDB	L	L	28	49	28	49	LYS	LYS	CB	CB	21	13.9	24.1	BS3	http://www.nature.com/emboj/journal/v29/n4/full/emboj2009401a.html	Chen et al. Architecture of the RNA polymerase II-TFIIF complex revealed by cross-linking and mass spectrometry. Embo J (2010) vol. 29 (4) pp. 717-621	# high confident
intra	P40422	P40422	RPAB4_YEAST	RPAB4_YEAST	1wcm	PDB	L	L	28	62	28	62	LYS	LYS	CB	CB	34	12	14.9	BS3	http://www.nature.com/emboj/journal/v29/n4/full/emboj2009401a.html	Chen et al. Architecture of the RNA polymerase II-TFIIF complex revealed by cross-linking and mass spectrometry. Embo J (2010) vol. 29 (4) pp. 717-621	# low confident
intra	P00968	P00968	CARB_ECOLI	CARB_ECOLI	1a9x	PDB	A	A	515	634	515	634	LYS	LYS	CB	CB	119	19.7	21.6	DSS	http://www.nature.com/nmeth/journal/v5/n4/full/nmeth.1192.html	Rinner et al. Identification of cross-linked peptides from large sequence databases. Nat Methods (2008) vol. 5 (4) pp. 315-318
intra	P08200	P08200	IDH_ECOLI	IDH_ECOLI	1ai2	PDB	A	A	12	62	12	62	LYS	LYS	CB	CB	50	10.7	16.3	DSS	http://www.nature.com/nmeth/journal/v5/n4/full/nmeth.1192.html	Rinner et al. Identification of cross-linked peptides from large sequence databases. Nat Methods (2008) vol. 5 (4) pp. 315-318
intra	P09030	P09030	EX3_ECOLI	EX3_ECOLI	1ako	PDB	A	A	176	121	176	121	LYS	LYS	CB	CB	55	11.7	20.2	DSS	http://www.nature.com/nmeth/journal/v5/n4/full/nmeth.1192.html	Rinner et al. Identification of cross-linked peptides from large sequence databases. Nat Methods (2008) vol. 5 (4) pp. 315-318
intra	P0A6F9	P0A6F9	CH10_ECOLI	CH10_ECOLI	1aon	PDB	P	P	34	15	34	15	LYS	LYS	CB	CB	19	10	21.5	DSS	http://www.nature.com/nmeth/journal/v5/n4/full/nmeth.1192.html	Rinner et al. Identification of cross-linked peptides from large sequence databases. Nat Methods (2008) vol. 5 (4) pp. 315-318
inter	P0A825	P0A825	GLYA_ECOLI	GLYA_ECOLI	1dfo	PDB	B	A	62	346	62	346	LYS	LYS	CB	CB	133	12.2	15.2	DSS	http://www.nature.com/nmeth/journal/v5/n4/full/nmeth.1192.html	Rinner et al. Identification of cross-linked peptides from large sequence databases. Nat Methods (2008) vol. 5 (4) pp. 315-318
inter	P0A825	P0A825	GLYA_ECOLI	GLYA_ECOLI	1dfo	PDB	A	B	3	375	3	375	LYS	LYS	CB	CB	789	18.9	20	DSS	http://www.nature.com/nmeth/journal/v5/n4/full/nmeth.1192.html	Rinner et al. Identification of cross-linked peptides from large sequence databases. Nat Methods (2008) vol. 5 (4) pp. 315-318
intra	P62707	P62707	GPMA_ECOLI	GPMA_ECOLI	1e58	PDB	A	A	113	100	112	99	LYS	LYS	CB	CB	13	10.2	12.9	DSS	http://www.nature.com/nmeth/journal/v5/n4/full/nmeth.1192.html	Rinner et al. Identification of cross-linked peptides from large sequence databases. Nat Methods (2008) vol. 5 (4) pp. 315-318
intra	P62707	P62707	GPMA_ECOLI	GPMA_ECOLI	1e58	PDB	A	A	142	86	141	85	LYS	LYS	CB	CB	56	12	12.6	DSS	http://www.nature.com/nmeth/journal/v5/n4/full/nmeth.1192.html	Rinner et al. Identification of cross-linked peptides from large sequence databases. Nat Methods (2008) vol. 5 (4) pp. 315-318
intra	P62707	P62707	GPMA_ECOLI	GPMA_ECOLI	1e58	PDB	A	A	18	33	17	32	LYS	LYS	CB	CB	15	7	8	DSS	http://www.nature.com/nmeth/journal/v5/n4/full/nmeth.1192.html	Rinner et al. Identification of cross-linked peptides from large sequence databases. Nat Methods (2008) vol. 5 (4) pp. 315-318
intra	P0A6P1	P0A6P1	EFTS_ECOLI	EFTS_ECOLI	1efu	PDB	B	B	25	51	24	50	LYS	LYS	CB	CB	26	15.9	18.7	DSS	http://www.nature.com/nmeth/journal/v5/n4/full/nmeth.1192.html	Rinner et al. Identification of cross-linked peptides from large sequence databases. Nat Methods (2008) vol. 5 (4) pp. 315-318
intra	P61889	P61889	MDH_ECOLI	MDH_ECOLI	1emd	PDB	A	A	82	217	82	217	LYS	LYS	CB	CB	135	9.4	23.5	DSS	http://www.nature.com/nmeth/journal/v5/n4/full/nmeth.1192.html	Rinner et al. Identification of cross-linked peptides from large sequence databases. Nat Methods (2008) vol. 5 (4) pp. 315-318
intra	P07012	P07012	RF2_ECOLI	RF2_ECOLI	1gqe	PDB	A	A	30	58	30	58	LYS	LYS	CB	CB	28	14.3	17.8	DSS	http://www.nature.com/nmeth/journal/v5/n4/full/nmeth.1192.html	Rinner et al. Identification of cross-linked peptides from large sequence databases. Nat Methods (2008) vol. 5 (4) pp. 315-318
intra	P0A870	P0A870	TALB_ECOLI	TALB_ECOLI	1i2n	PDB	A	A	4	262	4	262	LYS	LYS	CB	CB	258	13.2	16.2	DSS	http://www.nature.com/nmeth/journal/v5/n4/full/nmeth.1192.html	Rinner et al. Identification of cross-linked peptides from large sequence databases. Nat Methods (2008) vol. 5 (4) pp. 315-318
intra	P0A805	P0A805	RRF_ECOLI	RRF_ECOLI	1ise	PDB	A	A	15	7	15	7	LYS	LYS	CB	CB	8	12.7	17.5	DSS	http://www.nature.com/nmeth/journal/v5/n4/full/nmeth.1192.html	Rinner et al. Identification of cross-linked peptides from large sequence databases. Nat Methods (2008) vol. 5 (4) pp. 315-318
intra	P0A805	P0A805	RRF_ECOLI	RRF_ECOLI	1ise	PDB	A	A	26	15	26	15	LYS	LYS	CB	CB	11	17.4	20.6	DSS	http://www.nature.com/nmeth/journal/v5/n4/full/nmeth.1192.html	Rinner et al. Identification of cross-linked peptides from large sequence databases. Nat Methods (2008) vol. 5 (4) pp. 315-318
intra	P29745	P29745	PEPT_ECOLI	PEPT_ECOLI	1vix	PDB	B	B	161	182	159	180	LYS	LYS	CB	CB	21	37.4	56	DSS	http://www.nature.com/nmeth/journal/v5/n4/full/nmeth.1192.html	Rinner et al. Identification of cross-linked peptides from large sequence databases. Nat Methods (2008) vol. 5 (4) pp. 315-318
intra	P0A7V8	P0A7V8	RS4_ECOLI	RS4_ECOLI	1vs5	PDB	D	D	156	185	155	184	LYS	LYS	CB	CB	29	28.1	47.3	DSS	http://www.nature.com/nmeth/journal/v5/n4/full/nmeth.1192.html	Rinner et al. Identification of cross-linked peptides from large sequence databases. Nat Methods (2008) vol. 5 (4) pp. 315-318
intra	P0A7V8	P0A7V8	RS4_ECOLI	RS4_ECOLI	1vs5	PDB	D	D	183	167	182	166	LYS	LYS	CB	CB	16	11.6	14	DSS	http://www.nature.com/nmeth/journal/v5/n4/full/nmeth.1192.html	Rinner et al. Identification of cross-linked peptides from large sequence databases. Nat Methods (2008) vol. 5 (4) pp. 315-318
intra	P0A7V8	P0A7V8	RS4_ECOLI	RS4_ECOLI	1vs5	PDB	D	D	185	83	184	82	LYS	LYS	CB	CB	102	13.5	15.4	DSS	http://www.nature.com/nmeth/journal/v5/n4/full/nmeth.1192.html	Rinner et al. Identification of cross-linked peptides from large sequence databases. Nat Methods (2008) vol. 5 (4) pp. 315-318
intra	P0A7R5	P0A7R5	RS10_ECOLI	RS10_ECOLI	1vs5	PDB	J	J	11	30	11	30	LYS	LYS	CB	CB	19	19.6	40.7	DSS	http://www.nature.com/nmeth/journal/v5/n4/full/nmeth.1192.html	Rinner et al. Identification of cross-linked peptides from large sequence databases. Nat Methods (2008) vol. 5 (4) pp. 315-318
intra	P0A7R5	P0A7R5	RS10_ECOLI	RS10_ECOLI	1vs5	PDB	J	J	30	46	30	46	LYS	LYS	CB	CB	16	29.5	38.3	DSS	http://www.nature.com/nmeth/journal/v5/n4/full/nmeth.1192.html	Rinner et al. Identification of cross-linked peptides from large sequence databases. Nat Methods (2008) vol. 5 (4) pp. 315-318
intra	P0AG63	P0AG63	RS17_ECOLI	RS17_ECOLI	1vs5	PDB	Q	Q	16	43	15	42	LYS	LYS	CB	CB	27	14	15.3	DSS	http://www.nature.com/nmeth/journal/v5/n4/full/nmeth.1192.html	Rinner et al. Identification of cross-linked peptides from large sequence databases. Nat Methods (2008) vol. 5 (4) pp. 315-318
intra	P0A851	P0A851	TIG_ECO57	TIG_ECO57	1w26	PDB	B	B	152	239	152	239	LYS	LYS	CB	CB	85	11.4	18.1	DSS	http://www.nature.com/nmeth/journal/v5/n4/full/nmeth.1192.html	Rinner et al. Identification of cross-linked peptides from large sequence databases. Nat Methods (2008) vol. 5 (4) pp. 315-318
intra	P0A851	P0A851	TIG_ECO57	TIG_ECO57	1w26	PDB	A	A	287	361	287	361	LYS	LYS	CB	CB	74	20	26.4	DSS	http://www.nature.com/nmeth/journal/v5/n4/full/nmeth.1192.html	Rinner et al. Identification of cross-linked peptides from large sequence databases. Nat Methods (2008) vol. 5 (4) pp. 315-318
intra	P0A851	P0A851	TIG_ECO57	TIG_ECO57	1w26	PDB	A	A	361	392	361	392	LYS	LYS	CB	CB	30	16.5	17.6	DSS	http://www.nature.com/nmeth/journal/v5/n4/full/nmeth.1192.html	Rinner et al. Identification of cross-linked peptides from large sequence databases. Nat Methods (2008) vol. 5 (4) pp. 315-318
intra	P0A8T7	P0A8T7	RPOC_ECOLI	RPOC_ECOLI	2auk	PDB	C	C	44	20	44	20	LYS	LYS	CB	CB	24	4.1	4.5	DSS	http://www.nature.com/nmeth/journal/v5/n4/full/nmeth.1192.html	Rinner et al. Identification of cross-linked peptides from large sequence databases. Nat Methods (2008) vol. 5 (4) pp. 315-318
intra	P60422	P60422	RL2_ECOLI	RL2_ECOLI	2awb	PDB	C	C	183	68	182	67	LYS	LYS	CB	CB	115	21	32.6	DSS	http://www.nature.com/nmeth/journal/v5/n4/full/nmeth.1192.html	Rinner et al. Identification of cross-linked peptides from large sequence databases. Nat Methods (2008) vol. 5 (4) pp. 315-318
intra	P60422	P60422	RL2_ECOLI	RL2_ECOLI	2awb	PDB	C	C	207	183	206	182	LYS	LYS	CB	CB	24	44.6	57	DSS	http://www.nature.com/nmeth/journal/v5/n4/full/nmeth.1192.html	Rinner et al. Identification of cross-linked peptides from large sequence databases. Nat Methods (2008) vol. 5 (4) pp. 315-318
intra	P60422	P60422	RL2_ECOLI	RL2_ECOLI	2awb	PDB	C	C	207	71	206	70	LYS	LYS	CB	CB	136	44.1	57.9	DSS	http://www.nature.com/nmeth/journal/v5/n4/full/nmeth.1192.html	Rinner et al. Identification of cross-linked peptides from large sequence databases. Nat Methods (2008) vol. 5 (4) pp. 315-318
intra	P60422	P60422	RL2_ECOLI	RL2_ECOLI	2awb	PDB	C	C	97	183	96	182	LYS	LYS	CB	CB	86	37	51.5	DSS	http://www.nature.com/nmeth/journal/v5/n4/full/nmeth.1192.html	Rinner et al. Identification of cross-linked peptides from large sequence databases. Nat Methods (2008) vol. 5 (4) pp. 315-318
intra	P02413	P02413	RL15_ECOLI	RL15_ECOLI	2awb	PDB	L	L	129	141	129	141	LYS	LYS	CB	CB	12	17.4	25	DSS	http://www.nature.com/nmeth/journal/v5/n4/full/nmeth.1192.html	Rinner et al. Identification of cross-linked peptides from large sequence databases. Nat Methods (2008) vol. 5 (4) pp. 315-318
intra	0A7K6	0A7K6	RL19_ECOLI	RL19_ECOLI	2awb	PDB	P	P	87	63	86	62	LYS	LYS	CB	CB	24	16.7	38	DSS	http://www.nature.com/nmeth/journal/v5/n4/full/nmeth.1192.html	Rinner et al. Identification of cross-linked peptides from large sequence databases. Nat Methods (2008) vol. 5 (4) pp. 315-318
intra	P0A853	P0A853	TNAA_ECOLI	TNAA_ECOLI	2c44	PDB	A	A	219	121	219	121	LYS	LYS	CB	CB	98	13.7	17.7	DSS	http://www.nature.com/nmeth/journal/v5/n4/full/nmeth.1192.html	Rinner et al. Identification of cross-linked peptides from large sequence databases. Nat Methods (2008) vol. 5 (4) pp. 315-318
intra	P0A853	P0A853	TNAA_ECOLI	TNAA_ECOLI	2c44	PDB	A	A	239	246	239	246	LYS	LYS	CB	CB	7	6.6	8.2	DSS	http://www.nature.com/nmeth/journal/v5/n4/full/nmeth.1192.html	Rinner et al. Identification of cross-linked peptides from large sequence databases. Nat Methods (2008) vol. 5 (4) pp. 315-318	# Side chain atoms are missing
inter	P0A853	P0A853	TNAA_ECOLI	TNAA_ECOLI	2c44	PDB	C	D	459	115	459	115	LYS	LYS	CB	CB	123	11.2	11.6	DSS	http://www.nature.com/nmeth/journal/v5/n4/full/nmeth.1192.html	Rinner et al. Identification of cross-linked peptides from large sequence databases. Nat Methods (2008) vol. 5 (4) pp. 315-318	# Side chain atoms are missing
intra	P09038	P09038	FGF2_HUMAN	FGF2_HUMAN	4fgf	PDB	A	A	110	119	110	119	LYS	LYS	CB	CB	9	22.5	36.8	BS3	http://www.pnas.org/content/97/11/5802.full	Young et al. High throughput protein fold identification by using experimental constraints derived from intraecular cross-links and mass spectrometry. P Natl Acad Sci Usa (2000) vol. 97 (11) pp. 5802-5806
intra	P09038	P09038	FGF2_HUMAN	FGF2_HUMAN	4fgf	PDB	A	A	110	135	110	135	LYS	LYS	CB	CB	25	24.1	40.8	BS3	http://www.pnas.org/content/97/11/5802.full	Young et al. High throughput protein fold identification by using experimental constraints derived from intraecular cross-links and mass spectrometry. P Natl Acad Sci Usa (2000) vol. 97 (11) pp. 5802-5806
intra	P09038	P09038	FGF2_HUMAN	FGF2_HUMAN	4fgf	PDB	A	A	119	125	119	125	LYS	LYS	CB	CB	6	5	5.7	BS3	http://www.pnas.org/content/97/11/5802.full	Young et al. High throughput protein fold identification by using experimental constraints derived from intraecular cross-links and mass spectrometry. P Natl Acad Sci Usa (2000) vol. 97 (11) pp. 5802-5806
intra	P09038	P09038	FGF2_HUMAN	FGF2_HUMAN	4fgf	PDB	A	A	119	129	119	129	LYS	LYS	CB	CB	10	9.5	11.8	BS3	http://www.pnas.org/content/97/11/5802.full	Young et al. High throughput protein fold identification by using experimental constraints derived from intraecular cross-links and mass spectrometry. P Natl Acad Sci Usa (2000) vol. 97 (11) pp. 5802-5806
intra	P09038	P09038	FGF2_HUMAN	FGF2_HUMAN	4fgf	PDB	A	A	125	129	125	129	LYS	LYS	CB	CB	4	6	7.7	BS3	http://www.pnas.org/content/97/11/5802.full	Young et al. High throughput protein fold identification by using experimental constraints derived from intraecular cross-links and mass spectrometry. P Natl Acad Sci Usa (2000) vol. 97 (11) pp. 5802-5806
intra	P09038	P09038	FGF2_HUMAN	FGF2_HUMAN	4fgf	PDB	A	A	21	125	21	125	LYS	LYS	CB	CB	104	20.5	45.5	BS3	http://www.pnas.org/content/97/11/5802.full	Young et al. High throughput protein fold identification by using experimental constraints derived from intraecular cross-links and mass spectrometry. P Natl Acad Sci Usa (2000) vol. 97 (11) pp. 5802-5806
intra	P09038	P09038	FGF2_HUMAN	FGF2_HUMAN	4fgf	PDB	A	A	21	135	21	135	LYS	LYS	CB	CB	114	19.9	32.5	BS3	http://www.pnas.org/content/97/11/5802.full	Young et al. High throughput protein fold identification by using experimental constraints derived from intraecular cross-links and mass spectrometry. P Natl Acad Sci Usa (2000) vol. 97 (11) pp. 5802-5806
intra	P09038	P09038	FGF2_HUMAN	FGF2_HUMAN	4fgf	PDB	A	A	21	26	21	26	LYS	LYS	CB	CB	5	15.6	27	BS3	http://www.pnas.org/content/97/11/5802.full	Young et al. High throughput protein fold identification by using experimental constraints derived from intraecular cross-links and mass spectrometry. P Natl Acad Sci Usa (2000) vol. 97 (11) pp. 5802-5806
intra	P09038	P09038	FGF2_HUMAN	FGF2_HUMAN	4fgf	PDB	A	A	26	46	26	46	LYS	LYS	CB	CB	20	15.6	19.7	BS3	http://www.pnas.org/content/97/11/5802.full	Young et al. High throughput protein fold identification by using experimental constraints derived from intraecular cross-links and mass spectrometry. P Natl Acad Sci Usa (2000) vol. 97 (11) pp. 5802-5806
intra	P09038	P09038	FGF2_HUMAN	FGF2_HUMAN	4fgf	PDB	A	A	46	119	46	119	LYS	LYS	CB	CB	73	19.4	35.1	BS3	http://www.pnas.org/content/97/11/5802.full	Young et al. High throughput protein fold identification by using experimental constraints derived from intraecular cross-links and mass spectrometry. P Natl Acad Sci Usa (2000) vol. 97 (11) pp. 5802-5806
intra	P09038	P09038	FGF2_HUMAN	FGF2_HUMAN	4fgf	PDB	A	A	46	125	46	125	LYS	LYS	CB	CB	79	21.4	37.9	BS3	http://www.pnas.org/content/97/11/5802.full	Young et al. High throughput protein fold identification by using experimental constraints derived from intraecular cross-links and mass spectrometry. P Natl Acad Sci Usa (2000) vol. 97 (11) pp. 5802-5806
intra	P09038	P09038	FGF2_HUMAN	FGF2_HUMAN	4fgf	PDB	A	A	46	52	46	52	LYS	LYS	CB	CB	6	10.3	12.8	BS3	http://www.pnas.org/content/97/11/5802.full	Young et al. High throughput protein fold identification by using experimental constraints derived from intraecular cross-links and mass spectrometry. P Natl Acad Sci Usa (2000) vol. 97 (11) pp. 5802-5806
intra	P09038	P09038	FGF2_HUMAN	FGF2_HUMAN	4fgf	PDB	A	A	77	110	77	110	LYS	LYS	CB	CB	33	9.4	14.7	BS3	http://www.pnas.org/content/97/11/5802.full	Young et al. High throughput protein fold identification by using experimental constraints derived from intraecular cross-links and mass spectrometry. P Natl Acad Sci Usa (2000) vol. 97 (11) pp. 5802-5806
intra	P09038	P09038	FGF2_HUMAN	FGF2_HUMAN	4fgf	PDB	A	A	77	119	77	119	LYS	LYS	CB	CB	42	17.6	25.5	BS3	http://www.pnas.org/content/97/11/5802.full	Young et al. High throughput protein fold identification by using experimental constraints derived from intraecular cross-links and mass spectrometry. P Natl Acad Sci Usa (2000) vol. 97 (11) pp. 5802-5806
intra	P09038	P09038	FGF2_HUMAN	FGF2_HUMAN	4fgf	PDB	A	A	77	125	77	125	LYS	LYS	CB	CB	48	13.7	25.8	BS3	http://www.pnas.org/content/97/11/5802.full	Young et al. High throughput protein fold identification by using experimental constraints derived from intraecular cross-links and mass spectrometry. P Natl Acad Sci Usa (2000) vol. 97 (11) pp. 5802-5806
intra	P09038	P09038	FGF2_HUMAN	FGF2_HUMAN	4fgf	PDB	A	A	77	135	77	135	LYS	LYS	CB	CB	58	23	36.5	BS3	http://www.pnas.org/content/97/11/5802.full	Young et al. High throughput protein fold identification by using experimental constraints derived from intraecular cross-links and mass spectrometry. P Natl Acad Sci Usa (2000) vol. 97 (11) pp. 5802-5806
intra	P09038	P09038	FGF2_HUMAN	FGF2_HUMAN	4fgf	PDB	A	A	77	86	77	86	LYS	LYS	CB	CB	9	14.9	16.5	BS3	http://www.pnas.org/content/97/11/5802.full	Young et al. High throughput protein fold identification by using experimental constraints derived from intraecular cross-links and mass spectrometry. P Natl Acad Sci Usa (2000) vol. 97 (11) pp. 5802-5806
intra	P11182	P11182	ODB2_HUMAN	ODB2_HUMAN	1zwv	PDB	A	A	196	33	170	7	LYS	LYS	CB	CB	234	4.1	4.4	DSS	http://www.sciencemag.org/content/337/6100/1348.long	Herzog, F. et al. Structural probing of a protein phosphatase 2A network by chemical cross-linking and mass spectrometry. Science (2012) vol. 337, pp. 1348-1352
intra	P08107	P08107	HSP71_HUMAN	HSP71_HUMAN	1hjo	PDB	A	A	100	100	77	77	LYS	LYS	CB	CB	23	6.8	6.8	DSS	http://www.sciencemag.org/content/337/6100/1348.long	Herzog, F. et al. Structural probing of a protein phosphatase 2A network by chemical cross-linking and mass spectrometry. Science (2012) vol. 337, pp. 1348-1352
intra	P11142	P11142	HSP7C_HUMAN	HSP7C_HUMAN	3fzf	PDB	A	A	246	246	251	251	LYS	LYS	CB	CB	5	6.8	7.2	DSS	http://www.sciencemag.org/content/337/6100/1348.long	Herzog, F. et al. Structural probing of a protein phosphatase 2A network by chemical cross-linking and mass spectrometry. Science (2012) vol. 337, pp. 1348-1352
intra	Q13362	Q13362	2A5G_HUMAN	2A5G_HUMAN	3fga	PISA	B	B	424	414	420	410	LYS	LYS	CB	CB	4	6.2	7.5	DSS	http://www.sciencemag.org/content/337/6100/1348.long	Herzog, F. et al. Structural probing of a protein phosphatase 2A network by chemical cross-linking and mass spectrometry. Science (2012) vol. 337, pp. 1348-1352
intra	P08107	P08107	HSP71_HUMAN	HSP71_HUMAN	1hjo	PDB	A	A	246	246	251	251	LYS	LYS	CB	CB	5	6.5	7.6	DSS	http://www.sciencemag.org/content/337/6100/1348.long	Herzog, F. et al. Structural probing of a protein phosphatase 2A network by chemical cross-linking and mass spectrometry. Science (2012) vol. 337, pp. 1348-1352
intra	P63151	P63151	2ABA_HUMAN	2ABA_HUMAN	3dw8	PISA	A	A	404	404	402	402	LYS	LYS	CB	CB	2	6.6	7.7	DSS	http://www.sciencemag.org/content/337/6100/1348.long	Herzog, F. et al. Structural probing of a protein phosphatase 2A network by chemical cross-linking and mass spectrometry. Science (2012) vol. 337, pp. 1348-1352
intra	P67775	P67775	PP2AA_HUMAN	PP2AA_HUMAN	3fga	PISA	C	C	144	144	29	29	LYS	LYS	CB	CB	115	9.1	9.3	DSS	http://www.sciencemag.org/content/337/6100/1348.long	Herzog, F. et al. Structural probing of a protein phosphatase 2A network by chemical cross-linking and mass spectrometry. Science (2012) vol. 337, pp. 1348-1352
intra	Q13362	Q13362	2A5G_HUMAN	2A5G_HUMAN	3fga	PISA	B	B	156	146	192	182	LYS	LYS	CB	CB	36	9	11.3	DSS	http://www.sciencemag.org/content/337/6100/1348.long	Herzog, F. et al. Structural probing of a protein phosphatase 2A network by chemical cross-linking and mass spectrometry. Science (2012) vol. 337, pp. 1348-1352
intra	Q13362	Q13362	2A5G_HUMAN	2A5G_HUMAN	3fga	PISA	B	B	413	403	420	410	LYS	LYS	CB	CB	7	10.6	11.9	DSS	http://www.sciencemag.org/content/337/6100/1348.long	Herzog, F. et al. Structural probing of a protein phosphatase 2A network by chemical cross-linking and mass spectrometry. Science (2012) vol. 337, pp. 1348-1352
intra	P63151	P63151	2ABA_HUMAN	2ABA_HUMAN	3dw8	PISA	A	A	387	387	393	393	LYS	LYS	CB	CB	6	11.9	12.9	DSS	http://www.sciencemag.org/content/337/6100/1348.long	Herzog, F. et al. Structural probing of a protein phosphatase 2A network by chemical cross-linking and mass spectrometry. Science (2012) vol. 337, pp. 1348-1352
inter	P30153	P67775	2AAA_HUMAN	PP2AA_HUMAN	3fga	PISA	A	C	542	542	74	74	LYS	LYS	CB	CB	523	11.7	13.2	DSS	http://www.sciencemag.org/content/337/6100/1348.long	Herzog, F. et al. Structural probing of a protein phosphatase 2A network by chemical cross-linking and mass spectrometry. Science (2012) vol. 337, pp. 1348-1352
intra	Q01105	Q01105	SET_HUMAN	SET_HUMAN	2e50	PDB	Q	Q	150	137	172	159	LYS	LYS	CB	CB	15	10.1	13.4	DSS	http://www.sciencemag.org/content/337/6100/1348.long	Herzog, F. et al. Structural probing of a protein phosphatase 2A network by chemical cross-linking and mass spectrometry. Science (2012) vol. 337, pp. 1348-1352
intra	P11498	P11498	PYC_HUMAN	PYC_HUMAN	3bg3	PDB	D	D	1106	1106	1159	1159	LYS	LYS	CB	CB	53	12	13.4	DSS	http://www.sciencemag.org/content/337/6100/1348.long	Herzog, F. et al. Structural probing of a protein phosphatase 2A network by chemical cross-linking and mass spectrometry. Science (2012) vol. 337, pp. 1348-1352
intra	P63151	P63151	2ABA_HUMAN	2ABA_HUMAN	3dw8	PISA	A	A	396	396	393	393	LYS	LYS	CB	CB	3	9.8	13.4	DSS	http://www.sciencemag.org/content/337/6100/1348.long	Herzog, F. et al. Structural probing of a protein phosphatase 2A network by chemical cross-linking and mass spectrometry. Science (2012) vol. 337, pp. 1348-1352
intra	P67775	P67775	PP2AA_HUMAN	PP2AA_HUMAN	3fga	PISA	C	C	29	29	36	36	LYS	LYS	CB	CB	7	11	13.9	DSS	http://www.sciencemag.org/content/337/6100/1348.long	Herzog, F. et al. Structural probing of a protein phosphatase 2A network by chemical cross-linking and mass spectrometry. Science (2012) vol. 337, pp. 1348-1352
intra	Q13362	Q13362	2A5G_HUMAN	2A5G_HUMAN	3fga	PISA	B	B	249	239	202	192	LYS	LYS	CB	CB	47	12.8	13.9	DSS	http://www.sciencemag.org/content/337/6100/1348.long	Herzog, F. et al. Structural probing of a protein phosphatase 2A network by chemical cross-linking and mass spectrometry. Science (2012) vol. 337, pp. 1348-1352
intra	P63151	P63151	2ABA_HUMAN	2ABA_HUMAN	3dw8	PISA	A	A	105	105	123	123	LYS	LYS	CB	CB	18	9.6	14.1	DSS	http://www.sciencemag.org/content/337/6100/1348.long	Herzog, F. et al. Structural probing of a protein phosphatase 2A network by chemical cross-linking and mass spectrometry. Science (2012) vol. 337, pp. 1348-1352
intra	P63151	P63151	2ABA_HUMAN	2ABA_HUMAN	3dw8	PISA	A	A	405	405	402	402	LYS	LYS	CB	CB	3	11.2	14.4	DSS	http://www.sciencemag.org/content/337/6100/1348.long	Herzog, F. et al. Structural probing of a protein phosphatase 2A network by chemical cross-linking and mass spectrometry. Science (2012) vol. 337, pp. 1348-1352
intra	P11021	P11021	GRP78_HUMAN	GRP78_HUMAN	3iuc	PDB	A	A	287	287	294	294	LYS	LYS	CB	CB	7	11	14.8	DSS	http://www.sciencemag.org/content/337/6100/1348.long	Herzog, F. et al. Structural probing of a protein phosphatase 2A network by chemical cross-linking and mass spectrometry. Science (2012) vol. 337, pp. 1348-1352
intra	P63151	P63151	2ABA_HUMAN	2ABA_HUMAN	3dw8	PISA	A	A	405	405	393	393	LYS	LYS	CB	CB	12	12.9	14.9	DSS	http://www.sciencemag.org/content/337/6100/1348.long	Herzog, F. et al. Structural probing of a protein phosphatase 2A network by chemical cross-linking and mass spectrometry. Science (2012) vol. 337, pp. 1348-1352
intra	Q13362	Q13362	2A5G_HUMAN	2A5G_HUMAN	3fga	PISA	B	B	424	414	416	406	LYS	LYS	CB	CB	8	12.8	15	DSS	http://www.sciencemag.org/content/337/6100/1348.long	Herzog, F. et al. Structural probing of a protein phosphatase 2A network by chemical cross-linking and mass spectrometry. Science (2012) vol. 337, pp. 1348-1352
intra	P67775	P67775	PP2AA_HUMAN	PP2AA_HUMAN	3fga	PISA	C	C	41	41	34	34	LYS	LYS	CB	CB	7	12.8	15.3	DSS	http://www.sciencemag.org/content/337/6100/1348.long	Herzog, F. et al. Structural probing of a protein phosphatase 2A network by chemical cross-linking and mass spectrometry. Science (2012) vol. 337, pp. 1348-1352
intra	P30153	P30153	2AAA_HUMAN	2AAA_HUMAN	3dw8	PISA	B	B	331	331	292	292	LYS	LYS	CB	CB	39	11.3	15.3	DSS	http://www.sciencemag.org/content/337/6100/1348.long	Herzog, F. et al. Structural probing of a protein phosphatase 2A network by chemical cross-linking and mass spectrometry. Science (2012) vol. 337, pp. 1348-1352
intra	P30153	P30153	2AAA_HUMAN	2AAA_HUMAN	3fga	PISA	A	A	546	546	467	467	LYS	LYS	CB	CB	79	12.6	15.3	DSS	http://www.sciencemag.org/content/337/6100/1348.long	Herzog, F. et al. Structural probing of a protein phosphatase 2A network by chemical cross-linking and mass spectrometry. Science (2012) vol. 337, pp. 1348-1352
intra	Q13557	Q13557	KCC2D_HUMAN	KCC2D_HUMAN	2vn9	PDB	A	A	43	43	57	57	LYS	LYS	CB	CB	14	13.4	15.8	DSS	http://www.sciencemag.org/content/337/6100/1348.long	Herzog, F. et al. Structural probing of a protein phosphatase 2A network by chemical cross-linking and mass spectrometry. Science (2012) vol. 337, pp. 1348-1352
intra	P11498	P11498	PYC_HUMAN	PYC_HUMAN	3bg3	PDB	D	D	1103	1103	1159	1159	LYS	LYS	CB	CB	56	13.2	15.8	DSS	http://www.sciencemag.org/content/337/6100/1348.long	Herzog, F. et al. Structural probing of a protein phosphatase 2A network by chemical cross-linking and mass spectrometry. Science (2012) vol. 337, pp. 1348-1352
intra	P30153	P30153	2AAA_HUMAN	2AAA_HUMAN	3fga	PISA	A	A	519	519	475	475	LYS	LYS	CB	CB	44	11.7	15.8	DSS	http://www.sciencemag.org/content/337/6100/1348.long	Herzog, F. et al. Structural probing of a protein phosphatase 2A network by chemical cross-linking and mass spectrometry. Science (2012) vol. 337, pp. 1348-1352
intra	P30153	P30153	2AAA_HUMAN	2AAA_HUMAN	3fga	PISA	A	A	266	266	305	305	LYS	LYS	CB	CB	39	9.3	16	DSS	http://www.sciencemag.org/content/337/6100/1348.long	Herzog, F. et al. Structural probing of a protein phosphatase 2A network by chemical cross-linking and mass spectrometry. Science (2012) vol. 337, pp. 1348-1352
intra	P30153	P30153	2AAA_HUMAN	2AAA_HUMAN	3dw8	PISA	B	B	467	467	472	472	LYS	LYS	CB	CB	5	9.7	16	DSS	http://www.sciencemag.org/content/337/6100/1348.long	Herzog, F. et al. Structural probing of a protein phosphatase 2A network by chemical cross-linking and mass spectrometry. Science (2012) vol. 337, pp. 1348-1352
intra	P63167	P63167	DYL1_HUMAN	DYL1_HUMAN	1cmi	PDB	A	A	36	36	44	44	LYS	LYS	CB	CB	8	12.4	16.3	DSS	http://www.sciencemag.org/content/337/6100/1348.long	Herzog, F. et al. Structural probing of a protein phosphatase 2A network by chemical cross-linking and mass spectrometry. Science (2012) vol. 337, pp. 1348-1352
intra	Q13362	Q13362	2A5G_HUMAN	2A5G_HUMAN	3fga	PISA	B	B	45	35	69	59	LYS	LYS	CB	CB	24	9.8	16.3	DSS	http://www.sciencemag.org/content/337/6100/1348.long	Herzog, F. et al. Structural probing of a protein phosphatase 2A network by chemical cross-linking and mass spectrometry. Science (2012) vol. 337, pp. 1348-1352
intra	P30153	P30153	2AAA_HUMAN	2AAA_HUMAN	3fga	PISA	A	A	107	107	33	33	LYS	LYS	CB	CB	74	14.1	16.5	DSS	http://www.sciencemag.org/content/337/6100/1348.long	Herzog, F. et al. Structural probing of a protein phosphatase 2A network by chemical cross-linking and mass spectrometry. Science (2012) vol. 337, pp. 1348-1352
inter	P30155	P67775	2AAA_HUMAN	PP2AA_HUMAN	3dw8	PISA	B	C	546	546	74	74	LYS	LYS	CB	CB	112	15.8	16.6	DSS	http://www.sciencemag.org/content/337/6100/1348.long	Herzog, F. et al. Structural probing of a protein phosphatase 2A network by chemical cross-linking and mass spectrometry. Science (2012) vol. 337, pp. 1348-1352
intra	P08107	P08107	HSP71_HUMAN	HSP71_HUMAN	1hjo	PDB	A	A	319	319	325	325	LYS	LYS	CB	CB	6	12	16.8	DSS	http://www.sciencemag.org/content/337/6100/1348.long	Herzog, F. et al. Structural probing of a protein phosphatase 2A network by chemical cross-linking and mass spectrometry. Science (2012) vol. 337, pp. 1348-1352
intra	Q13362	Q13362	2A5G_HUMAN	2A5G_HUMAN	3fga	PISA	B	B	162	152	202	192	LYS	LYS	CB	CB	40	14.3	16.8	DSS	http://www.sciencemag.org/content/337/6100/1348.long	Herzog, F. et al. Structural probing of a protein phosphatase 2A network by chemical cross-linking and mass spectrometry. Science (2012) vol. 337, pp. 1348-1352
inter	P30156	P63151	2AAA_HUMAN	2ABA_HUMAN	3dw8	PISA	B	A	255	255	267	267	LYS	LYS	CB	CB	422	15.4	17.1	DSS	http://www.sciencemag.org/content/337/6100/1348.long	Herzog, F. et al. Structural probing of a protein phosphatase 2A network by chemical cross-linking and mass spectrometry. Science (2012) vol. 337, pp. 1348-1352
intra	Q13362	Q13362	2A5G_HUMAN	2A5G_HUMAN	3fga	PISA	B	B	291	281	333	323	LYS	LYS	CB	CB	42	14.3	17.1	DSS	http://www.sciencemag.org/content/337/6100/1348.long	Herzog, F. et al. Structural probing of a protein phosphatase 2A network by chemical cross-linking and mass spectrometry. Science (2012) vol. 337, pp. 1348-1352
intra	P63151	P63151	2ABA_HUMAN	2ABA_HUMAN	3dw8	PISA	A	A	404	404	393	393	LYS	LYS	CB	CB	11	14.7	17.1	DSS	http://www.sciencemag.org/content/337/6100/1348.long	Herzog, F. et al. Structural probing of a protein phosphatase 2A network by chemical cross-linking and mass spectrometry. Science (2012) vol. 337, pp. 1348-1352
intra	P11498	P11498	PYC_HUMAN	PYC_HUMAN	3bg3	PDB	D	D	1090	1090	1106	1106	LYS	LYS	CB	CB	11	15.6	17.5	DSS	http://www.sciencemag.org/content/337/6100/1348.long	Herzog, F. et al. Structural probing of a protein phosphatase 2A network by chemical cross-linking and mass spectrometry. Science (2012) vol. 337, pp. 1348-1352
intra	Q9Y570	Q9Y570	PPME1_HUMAN	PPME1_HUMAN	3c5w	PDB	P	P	293	293	203	203	LYS	LYS	CB	CB	46	13.9	17.5	DSS	http://www.sciencemag.org/content/337/6100/1348.long	Herzog, F. et al. Structural probing of a protein phosphatase 2A network by chemical cross-linking and mass spectrometry. Science (2012) vol. 337, pp. 1348-1352
intra	Q13362	Q13362	2A5G_HUMAN	2A5G_HUMAN	3fga	PISA	B	B	162	152	156	146	LYS	LYS	CB	CB	6	12.2	17.5	DSS	http://www.sciencemag.org/content/337/6100/1348.long	Herzog, F. et al. Structural probing of a protein phosphatase 2A network by chemical cross-linking and mass spectrometry. Science (2012) vol. 337, pp. 1348-1352
intra	Q13362	Q13362	2A5G_HUMAN	2A5G_HUMAN	3fga	PISA	B	B	413	403	418	408	LYS	LYS	CB	CB	5	9.5	17.5	DSS	http://www.sciencemag.org/content/337/6100/1348.long	Herzog, F. et al. Structural probing of a protein phosphatase 2A network by chemical cross-linking and mass spectrometry. Science (2012) vol. 337, pp. 1348-1352
intra	P30153	P30153	2AAA_HUMAN	2AAA_HUMAN	3fga	PISA	A	A	272	272	194	194	LYS	LYS	CB	CB	78	15.8	17.6	DSS	http://www.sciencemag.org/content/337/6100/1348.long	Herzog, F. et al. Structural probing of a protein phosphatase 2A network by chemical cross-linking and mass spectrometry. Science (2012) vol. 337, pp. 1348-1352
intra	Q9Y570	Q9Y570	PPME1_HUMAN	PPME1_HUMAN	3c5w	PDB	P	P	236	236	293	293	LYS	LYS	CB	CB	13	15.6	17.8	DSS	http://www.sciencemag.org/content/337/6100/1348.long	Herzog, F. et al. Structural probing of a protein phosphatase 2A network by chemical cross-linking and mass spectrometry. Science (2012) vol. 337, pp. 1348-1352
intra	P30153	P30153	2AAA_HUMAN	2AAA_HUMAN	3fga	PISA	A	A	194	194	266	266	LYS	LYS	CB	CB	72	16.3	17.9	DSS	http://www.sciencemag.org/content/337/6100/1348.long	Herzog, F. et al. Structural probing of a protein phosphatase 2A network by chemical cross-linking and mass spectrometry. Science (2012) vol. 337, pp. 1348-1352
intra	P11498	P11498	PYC_HUMAN	PYC_HUMAN	3bg3	PDB	A	A	499	499	1090	1090	LYS	LYS	CB	CB	590	15.1	18.3	DSS	http://www.sciencemag.org/content/337/6100/1348.long	Herzog, F. et al. Structural probing of a protein phosphatase 2A network by chemical cross-linking and mass spectrometry. Science (2012) vol. 337, pp. 1348-1352
intra	P30153	P30153	2AAA_HUMAN	2AAA_HUMAN	3dw8	PISA	B	B	331	331	374	374	LYS	LYS	CB	CB	43	14.3	18.3	DSS	http://www.sciencemag.org/content/337/6100/1348.long	Herzog, F. et al. Structural probing of a protein phosphatase 2A network by chemical cross-linking and mass spectrometry. Science (2012) vol. 337, pp. 1348-1352
intra	P08107	P08107	HSP71_HUMAN	HSP71_HUMAN	1hjo	PDB	A	A	56	56	257	257	LYS	LYS	CB	CB	201	16	18.7	DSS	http://www.sciencemag.org/content/337/6100/1348.long	Herzog, F. et al. Structural probing of a protein phosphatase 2A network by chemical cross-linking and mass spectrometry. Science (2012) vol. 337, pp. 1348-1352
intra	Q96RQ3	Q96RQ3	MCCA_HUMAN	MCCA_HUMAN	2ejm	PDB	A	A	721	89	667	35	LYS	LYS	CB	CB	342	13	18.7	DSS	http://www.sciencemag.org/content/337/6100/1348.long	Herzog, F. et al. Structural probing of a protein phosphatase 2A network by chemical cross-linking and mass spectrometry. Science (2012) vol. 337, pp. 1348-1352
intra	P30153	P30153	2AAA_HUMAN	2AAA_HUMAN	3fga	PISA	A	A	272	272	307	307	LYS	LYS	CB	CB	35	15.1	18.8	DSS	http://www.sciencemag.org/content/337/6100/1348.long	Herzog, F. et al. Structural probing of a protein phosphatase 2A network by chemical cross-linking and mass spectrometry. Science (2012) vol. 337, pp. 1348-1352
intra	P30153	P30153	2AAA_HUMAN	2AAA_HUMAN	3dw8	PISA	B	B	475	475	467	467	LYS	LYS	CB	CB	8	10.6	18.9	DSS	http://www.sciencemag.org/content/337/6100/1348.long	Herzog, F. et al. Structural probing of a protein phosphatase 2A network by chemical cross-linking and mass spectrometry. Science (2012) vol. 337, pp. 1348-1352
intra	P30153	P30153	2AAA_HUMAN	2AAA_HUMAN	3dw8	PISA	B	B	475	475	468	468	LYS	LYS	CB	CB	7	12.5	19	DSS	http://www.sciencemag.org/content/337/6100/1348.long	Herzog, F. et al. Structural probing of a protein phosphatase 2A network by chemical cross-linking and mass spectrometry. Science (2012) vol. 337, pp. 1348-1352
intra	P11142	P11142	HSP7C_HUMAN	HSP7C_HUMAN	3fzf	PDB	A	A	319	319	325	325	LYS	LYS	CB	CB	6	12.1	19	DSS	http://www.sciencemag.org/content/337/6100/1348.long	Herzog, F. et al. Structural probing of a protein phosphatase 2A network by chemical cross-linking and mass spectrometry. Science (2012) vol. 337, pp. 1348-1352
intra	P67775	P67775	PP2AA_HUMAN	PP2AA_HUMAN	3dw8	PISA	C	C	8	8	34	34	LYS	LYS	CB	CB	26	13.9	19.1	DSS	http://www.sciencemag.org/content/337/6100/1348.long	Herzog, F. et al. Structural probing of a protein phosphatase 2A network by chemical cross-linking and mass spectrometry. Science (2012) vol. 337, pp. 1348-1352	# Side chain atoms are missing
intra	P11498	P11498	PYC_HUMAN	PYC_HUMAN	3bg3	PDB	D	D	499	499	1056	1056	LYS	LYS	CB	CB	556	12.9	20.5	DSS	http://www.sciencemag.org/content/337/6100/1348.long	Herzog, F. et al. Structural probing of a protein phosphatase 2A network by chemical cross-linking and mass spectrometry. Science (2012) vol. 337, pp. 1348-1352
intra	Q13362	Q13362	2A5G_HUMAN	2A5G_HUMAN	3fga	PISA	B	B	45	35	66	56	LYS	LYS	CB	CB	21	15.5	20.5	DSS	http://www.sciencemag.org/content/337/6100/1348.long	Herzog, F. et al. Structural probing of a protein phosphatase 2A network by chemical cross-linking and mass spectrometry. Science (2012) vol. 337, pp. 1348-1352
intra	Q13362	Q13362	2A5G_HUMAN	2A5G_HUMAN	3fga	PISA	B	B	156	146	202	192	LYS	LYS	CB	CB	46	17.6	20.7	DSS	http://www.sciencemag.org/content/337/6100/1348.long	Herzog, F. et al. Structural probing of a protein phosphatase 2A network by chemical cross-linking and mass spectrometry. Science (2012) vol. 337, pp. 1348-1352
intra	Q13554	Q13554	KCC2B_HUMAN	KCC2B_HUMAN	3bhh	PDB	A	A	57	57	48	48	LYS	LYS	CB	CB	9	15.6	21.1	DSS	http://www.sciencemag.org/content/337/6100/1348.long	Herzog, F. et al. Structural probing of a protein phosphatase 2A network by chemical cross-linking and mass spectrometry. Science (2012) vol. 337, pp. 1348-1352
intra	Q13362	Q13362	2A5G_HUMAN	2A5G_HUMAN	3fga	PISA	B	B	64	54	45	35	LYS	LYS	CB	CB	19	17.2	21.1	DSS	http://www.sciencemag.org/content/337/6100/1348.long	Herzog, F. et al. Structural probing of a protein phosphatase 2A network by chemical cross-linking and mass spectrometry. Science (2012) vol. 337, pp. 1348-1352
intra	P63151	P63151	2ABA_HUMAN	2ABA_HUMAN	3dw8	PISA	A	A	129	129	123	123	LYS	LYS	CB	CB	6	18	21.3	DSS	http://www.sciencemag.org/content/337/6100/1348.long	Herzog, F. et al. Structural probing of a protein phosphatase 2A network by chemical cross-linking and mass spectrometry. Science (2012) vol. 337, pp. 1348-1352
inter	P30153	P67775	2AAA_HUMAN	PP2AA_HUMAN	3fga	PISA	A	C	546	546	8	8	LYS	LYS	CB	CB	453	19.8	21.3	DSS	http://www.sciencemag.org/content/337/6100/1348.long	Herzog, F. et al. Structural probing of a protein phosphatase 2A network by chemical cross-linking and mass spectrometry. Science (2012) vol. 337, pp. 1348-1352	# Side chain atoms are missing
intra	P30153	P30153	2AAA_HUMAN	2AAA_HUMAN	3dw8	PISA	B	B	188	188	163	163	LYS	LYS	CB	CB	25	15.9	21.6	DSS	http://www.sciencemag.org/content/337/6100/1348.long	Herzog, F. et al. Structural probing of a protein phosphatase 2A network by chemical cross-linking and mass spectrometry. Science (2012) vol. 337, pp. 1348-1352
intra	P30153	P30153	2AAA_HUMAN	2AAA_HUMAN	3fga	PISA	A	A	188	188	107	107	LYS	LYS	CB	CB	81	17	21.9	DSS	http://www.sciencemag.org/content/337/6100/1348.long	Herzog, F. et al. Structural probing of a protein phosphatase 2A network by chemical cross-linking and mass spectrometry. Science (2012) vol. 337, pp. 1348-1352
intra	P11142	P11142	HSP7C_HUMAN	HSP7C_HUMAN	3fzf	PDB	A	A	56	56	257	257	LYS	LYS	CB	CB	201	18.9	22	DSS	http://www.sciencemag.org/content/337/6100/1348.long	Herzog, F. et al. Structural probing of a protein phosphatase 2A network by chemical cross-linking and mass spectrometry. Science (2012) vol. 337, pp. 1348-1352
inter	P30153	Q13362	2AAA_HUMAN	2A5G_HUMAN	3fga	PISA	A	B	34	34	424	414	LYS	LYS	CB	CB	946	15.2	22.2	DSS	http://www.sciencemag.org/content/337/6100/1348.long	Herzog, F. et al. Structural probing of a protein phosphatase 2A network by chemical cross-linking and mass spectrometry. Science (2012) vol. 337, pp. 1348-1352
intra	Q13362	Q13362	2A5G_HUMAN	2A5G_HUMAN	3fga	PISA	B	B	413	403	379	369	LYS	LYS	CB	CB	34	19.8	22.3	DSS	http://www.sciencemag.org/content/337/6100/1348.long	Herzog, F. et al. Structural probing of a protein phosphatase 2A network by chemical cross-linking and mass spectrometry. Science (2012) vol. 337, pp. 1348-1352
intra	P11498	P11498	PYC_HUMAN	PYC_HUMAN	3bg3	PDB	D	D	1096	1096	1159	1159	LYS	LYS	CB	CB	58	19.5	22.4	DSS	http://www.sciencemag.org/content/337/6100/1348.long	Herzog, F. et al. Structural probing of a protein phosphatase 2A network by chemical cross-linking and mass spectrometry. Science (2012) vol. 337, pp. 1348-1352
intra	P11498	P11498	PYC_HUMAN	PYC_HUMAN	3bg3	PDB	D	D	1090	1090	1159	1159	LYS	LYS	CB	CB	64	21.2	22.4	DSS	http://www.sciencemag.org/content/337/6100/1348.long	Herzog, F. et al. Structural probing of a protein phosphatase 2A network by chemical cross-linking and mass spectrometry. Science (2012) vol. 337, pp. 1348-1352
intra	Q13362	Q13362	2A5G_HUMAN	2A5G_HUMAN	3fga	PISA	B	B	333	323	379	369	LYS	LYS	CB	CB	46	18.5	22.9	DSS	http://www.sciencemag.org/content/337/6100/1348.long	Herzog, F. et al. Structural probing of a protein phosphatase 2A network by chemical cross-linking and mass spectrometry. Science (2012) vol. 337, pp. 1348-1352
inter	P11499	P11499	PYC_HUMAN	PYC_HUMAN	3bg3	PDB	A	B	1124	1124	969	969	LYS	LYS	CB	CB	529	17.3	23	DSS	http://www.sciencemag.org/content/337/6100/1348.long	Herzog, F. et al. Structural probing of a protein phosphatase 2A network by chemical cross-linking and mass spectrometry. Science (2012) vol. 337, pp. 1348-1352
intra	Q13362	Q13362	2A5G_HUMAN	2A5G_HUMAN	3fga	PISA	B	B	416	406	379	369	LYS	LYS	CB	CB	37	20.9	23.1	DSS	http://www.sciencemag.org/content/337/6100/1348.long	Herzog, F. et al. Structural probing of a protein phosphatase 2A network by chemical cross-linking and mass spectrometry. Science (2012) vol. 337, pp. 1348-1352
intra	Q13362	Q13362	2A5G_HUMAN	2A5G_HUMAN	3fga	PISA	B	B	183	173	192	182	LYS	LYS	CB	CB	9	15.5	23.2	DSS	http://www.sciencemag.org/content/337/6100/1348.long	Herzog, F. et al. Structural probing of a protein phosphatase 2A network by chemical cross-linking and mass spectrometry. Science (2012) vol. 337, pp. 1348-1352
intra	P11498	P11498	PYC_HUMAN	PYC_HUMAN	3bg3	PDB	D	D	1130	1130	1159	1159	LYS	LYS	CB	CB	29	14.8	23.7	DSS	http://www.sciencemag.org/content/337/6100/1348.long	Herzog, F. et al. Structural probing of a protein phosphatase 2A network by chemical cross-linking and mass spectrometry. Science (2012) vol. 337, pp. 1348-1352
intra	P63151	P63151	2ABA_HUMAN	2ABA_HUMAN	3dw8	PISA	A	A	402	402	393	393	LYS	LYS	CB	CB	9	20.7	24.7	DSS	http://www.sciencemag.org/content/337/6100/1348.long	Herzog, F. et al. Structural probing of a protein phosphatase 2A network by chemical cross-linking and mass spectrometry. Science (2012) vol. 337, pp. 1348-1352
intra	P63151	P63151	2ABA_HUMAN	2ABA_HUMAN	3dw8	PISA	A	A	387	387	396	396	LYS	LYS	CB	CB	9	21.1	26.8	DSS	http://www.sciencemag.org/content/337/6100/1348.long	Herzog, F. et al. Structural probing of a protein phosphatase 2A network by chemical cross-linking and mass spectrometry. Science (2012) vol. 337, pp. 1348-1352
intra	Q13362	Q13362	2A5G_HUMAN	2A5G_HUMAN	3fga	PISA	B	B	192	182	157	147	LYS	LYS	CB	CB	35	13.9	27.1	DSS	http://www.sciencemag.org/content/337/6100/1348.long	Herzog, F. et al. Structural probing of a protein phosphatase 2A network by chemical cross-linking and mass spectrometry. Science (2012) vol. 337, pp. 1348-1352
intra	P63151	P63151	2ABA_HUMAN	2ABA_HUMAN	3dw8	PISA	A	A	374	374	393	393	LYS	LYS	CB	CB	19	21.3	27.7	DSS	http://www.sciencemag.org/content/337/6100/1348.long	Herzog, F. et al. Structural probing of a protein phosphatase 2A network by chemical cross-linking and mass spectrometry. Science (2012) vol. 337, pp. 1348-1352
intra	P30153	P30153	2AAA_HUMAN	2AAA_HUMAN	3dw8	PISA	B	B	133	133	163	163	LYS	LYS	CB	CB	30	13.4	28	DSS	http://www.sciencemag.org/content/337/6100/1348.long	Herzog, F. et al. Structural probing of a protein phosphatase 2A network by chemical cross-linking and mass spectrometry. Science (2012) vol. 337, pp. 1348-1352
intra	P11182	P11182	ODB2_HUMAN	ODB2_HUMAN	1zwv	PDB	A	A	202	39	170	7	LYS	LYS	CB	CB	176	16.6	28.2	DSS	http://www.sciencemag.org/content/337/6100/1348.long	Herzog, F. et al. Structural probing of a protein phosphatase 2A network by chemical cross-linking and mass spectrometry. Science (2012) vol. 337, pp. 1348-1352
intra	P11498	P11498	PYC_HUMAN	PYC_HUMAN	3bg3	PDB	A	A	1109	1109	1130	1130	LYS	LYS	CB	CB	21	20.3	30.4	DSS	http://www.sciencemag.org/content/337/6100/1348.long	Herzog, F. et al. Structural probing of a protein phosphatase 2A network by chemical cross-linking and mass spectrometry. Science (2012) vol. 337, pp. 1348-1352
intra	P05165	P05165	PCCA_HUMAN	PCCA_HUMAN	2cqy	PDB	A	A	177	9	227	59	LYS	LYS	CB	CB	922	29.2	31.6	DSS	http://www.sciencemag.org/content/337/6100/1348.long	Herzog, F. et al. Structural probing of a protein phosphatase 2A network by chemical cross-linking and mass spectrometry. Science (2012) vol. 337, pp. 1348-1352
intra	P30153	P30153	2AAA_HUMAN	2AAA_HUMAN	3dw8	PISA	B	B	188	188	305	305	LYS	LYS	CB	CB	117	26.7	32.4	DSS	http://www.sciencemag.org/content/337/6100/1348.long	Herzog, F. et al. Structural probing of a protein phosphatase 2A network by chemical cross-linking and mass spectrometry. Science (2012) vol. 337, pp. 1348-1352
intra	P08670	P08670	VIME_HUMAN	VIME_HUMAN	3g1e	PDB	B	B	104	104	120	120	LYS	LYS	CB	CB	16	25.1	33.6	DSS	http://www.sciencemag.org/content/337/6100/1348.long	Herzog, F. et al. Structural probing of a protein phosphatase 2A network by chemical cross-linking and mass spectrometry. Science (2012) vol. 337, pp. 1348-1352
intra	Q13362	Q13362	2A5G_HUMAN	2A5G_HUMAN	3fga	PISA	B	B	192	182	202	192	LYS	LYS	CB	CB	10	18.5	33.8	DSS	http://www.sciencemag.org/content/337/6100/1348.long	Herzog, F. et al. Structural probing of a protein phosphatase 2A network by chemical cross-linking and mass spectrometry. Science (2012) vol. 337, pp. 1348-1352
intra	P30153	P30153	2AAA_HUMAN	2AAA_HUMAN	3fga	PISA	A	A	266	266	255	255	LYS	LYS	CB	CB	11	18.7	33.9	DSS	http://www.sciencemag.org/content/337/6100/1348.long	Herzog, F. et al. Structural probing of a protein phosphatase 2A network by chemical cross-linking and mass spectrometry. Science (2012) vol. 337, pp. 1348-1352
intra	P30153	P30153	2AAA_HUMAN	2AAA_HUMAN	3dw8	PISA	B	B	188	188	33	33	LYS	LYS	CB	CB	155	29.4	34	DSS	http://www.sciencemag.org/content/337/6100/1348.long	Herzog, F. et al. Structural probing of a protein phosphatase 2A network by chemical cross-linking and mass spectrometry. Science (2012) vol. 337, pp. 1348-1352
intra	P11498	P11498	PYC_HUMAN	PYC_HUMAN	3bg3	PDB	A	A	1130	1130	1106	1106	LYS	LYS	CB	CB	24	21.3	34.2	DSS	http://www.sciencemag.org/content/337/6100/1348.long	Herzog, F. et al. Structural probing of a protein phosphatase 2A network by chemical cross-linking and mass spectrometry. Science (2012) vol. 337, pp. 1348-1352
intra	Q13555	Q13555	KCC2G_HUMAN	KCC2G_HUMAN	2v7o	PDB	A	A	69	69	57	57	LYS	LYS	CB	CB	12	21.9	34.3	DSS	http://www.sciencemag.org/content/337/6100/1348.long	Herzog, F. et al. Structural probing of a protein phosphatase 2A network by chemical cross-linking and mass spectrometry. Science (2012) vol. 337, pp. 1348-1352
intra	P63151	P63151	2ABA_HUMAN	2ABA_HUMAN	3dw8	PISA	A	A	137	137	123	123	LYS	LYS	CB	CB	14	32	35.7	DSS	http://www.sciencemag.org/content/337/6100/1348.long	Herzog, F. et al. Structural probing of a protein phosphatase 2A network by chemical cross-linking and mass spectrometry. Science (2012) vol. 337, pp. 1348-1352	# Side chain atoms are missing
intra	P30153	P30153	2AAA_HUMAN	2AAA_HUMAN	3fga	PISA	A	A	485	485	416	416	LYS	LYS	CB	CB	69	25.7	35.8	DSS	http://www.sciencemag.org/content/337/6100/1348.long	Herzog, F. et al. Structural probing of a protein phosphatase 2A network by chemical cross-linking and mass spectrometry. Science (2012) vol. 337, pp. 1348-1352
intra	Q13362	Q13362	2A5G_HUMAN	2A5G_HUMAN	3fga	PISA	B	B	192	182	45	35	LYS	LYS	CB	CB	147	25	36.6	DSS	http://www.sciencemag.org/content/337/6100/1348.long	Herzog, F. et al. Structural probing of a protein phosphatase 2A network by chemical cross-linking and mass spectrometry. Science (2012) vol. 337, pp. 1348-1352
intra	P11498	P11498	PYC_HUMAN	PYC_HUMAN	3bg3	PDB	D	D	717	717	969	969	LYS	LYS	CB	CB	251	27.3	36.7	DSS	http://www.sciencemag.org/content/337/6100/1348.long	Herzog, F. et al. Structural probing of a protein phosphatase 2A network by chemical cross-linking and mass spectrometry. Science (2012) vol. 337, pp. 1348-1352
intra	Q13362	Q13362	2A5G_HUMAN	2A5G_HUMAN	3fga	PISA	B	B	424	414	379	369	LYS	LYS	CB	CB	45	33.2	37.7	DSS	http://www.sciencemag.org/content/337/6100/1348.long	Herzog, F. et al. Structural probing of a protein phosphatase 2A network by chemical cross-linking and mass spectrometry. Science (2012) vol. 337, pp. 1348-1352
intra	P63151	P63151	2ABA_HUMAN	2ABA_HUMAN	3dw8	PISA	A	A	387	387	402	402	LYS	LYS	CB	CB	15	30.5	38.4	DSS	http://www.sciencemag.org/content/337/6100/1348.long	Herzog, F. et al. Structural probing of a protein phosphatase 2A network by chemical cross-linking and mass spectrometry. Science (2012) vol. 337, pp. 1348-1352
intra	P30153	P30153	2AAA_HUMAN	2AAA_HUMAN	3fga	PISA	A	A	188	188	255	255	LYS	LYS	CB	CB	67	25.5	38.7	DSS	http://www.sciencemag.org/content/337/6100/1348.long	Herzog, F. et al. Structural probing of a protein phosphatase 2A network by chemical cross-linking and mass spectrometry. Science (2012) vol. 337, pp. 1348-1352
intra	P63151	P63151	2ABA_HUMAN	2ABA_HUMAN	3dw8	PISA	A	A	387	387	374	374	LYS	LYS	CB	CB	13	31.1	39	DSS	http://www.sciencemag.org/content/337/6100/1348.long	Herzog, F. et al. Structural probing of a protein phosphatase 2A network by chemical cross-linking and mass spectrometry. Science (2012) vol. 337, pp. 1348-1352
intra	P30153	P30153	2AAA_HUMAN	2AAA_HUMAN	3fga	PISA	A	A	255	255	305	305	LYS	LYS	CB	CB	50	22.2	42.3	DSS	http://www.sciencemag.org/content/337/6100/1348.long	Herzog, F. et al. Structural probing of a protein phosphatase 2A network by chemical cross-linking and mass spectrometry. Science (2012) vol. 337, pp. 1348-1352
inter	P11500	P11500	PYC_HUMAN	PYC_HUMAN	3bg3	PDB	B	A	969	969	1159	1159	LYS	LYS	CB	CB	494	27.1	43.4	DSS	http://www.sciencemag.org/content/337/6100/1348.long	Herzog, F. et al. Structural probing of a protein phosphatase 2A network by chemical cross-linking and mass spectrometry. Science (2012) vol. 337, pp. 1348-1352
intra	P30153	P30153	2AAA_HUMAN	2AAA_HUMAN	3dw8	PISA	B	B	163	163	107	107	LYS	LYS	CB	CB	56	27.1	43.8	DSS	http://www.sciencemag.org/content/337/6100/1348.long	Herzog, F. et al. Structural probing of a protein phosphatase 2A network by chemical cross-linking and mass spectrometry. Science (2012) vol. 337, pp. 1348-1352
intra	P30153	P30153	2AAA_HUMAN	2AAA_HUMAN	3dw8	PISA	B	B	163	163	255	255	LYS	LYS	CB	CB	92	36.7	44.9	DSS	http://www.sciencemag.org/content/337/6100/1348.long	Herzog, F. et al. Structural probing of a protein phosphatase 2A network by chemical cross-linking and mass spectrometry. Science (2012) vol. 337, pp. 1348-1352
intra	P30153	P30153	2AAA_HUMAN	2AAA_HUMAN	3dw8	PISA	B	B	133	133	188	188	LYS	LYS	CB	CB	55	15.9	45.3	DSS	http://www.sciencemag.org/content/337/6100/1348.long	Herzog, F. et al. Structural probing of a protein phosphatase 2A network by chemical cross-linking and mass spectrometry. Science (2012) vol. 337, pp. 1348-1352
intra	P30153	P30153	2AAA_HUMAN	2AAA_HUMAN	3fga	PISA	A	A	133	133	255	255	LYS	LYS	CB	CB	122	36.6	45.6	DSS	http://www.sciencemag.org/content/337/6100/1348.long	Herzog, F. et al. Structural probing of a protein phosphatase 2A network by chemical cross-linking and mass spectrometry. Science (2012) vol. 337, pp. 1348-1352
intra	P30153	P30153	2AAA_HUMAN	2AAA_HUMAN	3dw8	PISA	B	B	133	133	194	194	LYS	LYS	CB	CB	61	21.6	46.4	DSS	http://www.sciencemag.org/content/337/6100/1348.long	Herzog, F. et al. Structural probing of a protein phosphatase 2A network by chemical cross-linking and mass spectrometry. Science (2012) vol. 337, pp. 1348-1352
intra	Q13362	Q13362	2A5G_HUMAN	2A5G_HUMAN	3fga	PISA	B	B	395	385	379	369	LYS	LYS	CB	CB	16	15.8	47.5	DSS	http://www.sciencemag.org/content/337/6100/1348.long	Herzog, F. et al. Structural probing of a protein phosphatase 2A network by chemical cross-linking and mass spectrometry. Science (2012) vol. 337, pp. 1348-1352
intra	P30153	P30153	2AAA_HUMAN	2AAA_HUMAN	3dw8	PISA	B	B	163	163	305	305	LYS	LYS	CB	CB	142	38.6	47.9	DSS	http://www.sciencemag.org/content/337/6100/1348.long	Herzog, F. et al. Structural probing of a protein phosphatase 2A network by chemical cross-linking and mass spectrometry. Science (2012) vol. 337, pp. 1348-1352
inter	P11502	P11502	PYC_HUMAN	PYC_HUMAN	3bg3	PDB	C	D	888	888	1159	1159	LYS	LYS	CB	CB	869	36.2	53.2	DSS	http://www.sciencemag.org/content/337/6100/1348.long	Herzog, F. et al. Structural probing of a protein phosphatase 2A network by chemical cross-linking and mass spectrometry. Science (2012) vol. 337, pp. 1348-1352
intra	P30153	P30153	2AAA_HUMAN	2AAA_HUMAN	3dw8	PISA	B	B	133	133	107	107	LYS	LYS	CB	CB	26	21.4	57.4	DSS	http://www.sciencemag.org/content/337/6100/1348.long	Herzog, F. et al. Structural probing of a protein phosphatase 2A network by chemical cross-linking and mass spectrometry. Science (2012) vol. 337, pp. 1348-1352
intra	P30153	P30153	2AAA_HUMAN	2AAA_HUMAN	3dw8	PISA	B	B	133	133	33	33	LYS	LYS	CB	CB	100	32.2	61.9	DSS	http://www.sciencemag.org/content/337/6100/1348.long	Herzog, F. et al. Structural probing of a protein phosphatase 2A network by chemical cross-linking and mass spectrometry. Science (2012) vol. 337, pp. 1348-1352
intra	P30153	P30153	2AAA_HUMAN	2AAA_HUMAN	3dw8	PISA	B	B	133	133	305	305	LYS	LYS	CB	CB	172	42.5	70.9	DSS	http://www.sciencemag.org/content/337/6100/1348.long	Herzog, F. et al. Structural probing of a protein phosphatase 2A network by chemical cross-linking and mass spectrometry. Science (2012) vol. 337, pp. 1348-1352
